# Supplementary material for: Bromine radical-enhanced HAT activity leading to stoichiometric couplings of methylarenes with acid chlorides
Source: Royal Society of Chemistry journal article supplement (doi:10.1039/d2gc02972c), 2022-01-01

# Supporting Information

## Bromine Radical-Enhanced HAT Activity Leading to Stoichiometric Couplings of Methylarenes with Acid Chlorides

Qiao-Lin Wang<sup>a</sup>, Huawen Huang<sup>\*a</sup>, Guojiang Mao<sup>b</sup>, and Guo-Jun Deng<sup>\*a</sup>

<sup>a</sup> Key Laboratory for Green Organic Synthesis and Application of Hunan Province, Key Laboratory of Environmentally Friendly Chemistry and Application of Ministry of Education, College of Chemistry, Xiangtan University, Xiangtan 411105, China.

E-mail: hwhuang@xtu.edu.cn; [gjdeng@xtu.edu.cn](mailto:gjdeng@xtu.edu.cn).

<sup>b</sup> School of Chemistry and Chemical Engineering, Henan Normal University, Xinxiang, 453007, P. R. China.

### List of Contents

|                                                             |            |
|-------------------------------------------------------------|------------|
| <b>1. General information</b>                               | <b>S2</b>  |
| <b>2. Experimental section</b>                              | <b>S3</b>  |
| <b>2.1 Typical experimental procedure for the acylation</b> | <b>S3</b>  |
| <b>2.2 Optimization of reaction conditions</b>              | <b>S3</b>  |
| <b>2.3 Scale-up experiment</b>                              | <b>S4</b>  |
| <b>3. Mechanistic studies</b>                               | <b>S6</b>  |
| <b>3.1 Radical trapping experiments</b>                     | <b>S6</b>  |
| <b>3.2 Benzyl radical trapping experiments</b>              | <b>S7</b>  |
| <b>3.3 Kinetic isotope effect</b>                           | <b>S8</b>  |
| <b>3.4 Light on/off experiment</b>                          | <b>S8</b>  |
| <b>3.5 Stern–Volmer quenching</b>                           | <b>S8</b>  |
| <b>4. Analytical data</b>                                   | <b>S12</b> |
| <b>5. Reference</b>                                         | <b>S26</b> |
| <b>6. Copies of NMR spectra</b>                             | <b>S27</b> |

## 1. General information

All reactions were carried out with magnetic stirring and in dried glassware. Standard syringe techniques were applied for transfer of dry solvents. All reagents and solvents were commercially available and used without any further purification unless specified. The reactions via general procedure was carried out under an atmosphere of argon unless otherwise noted. Column chromatography was performed using silica gel (200-300 mesh) or thin layer chromatography was performed using silica gel (GF254).  $^1\text{H}$  NMR and  $^{13}\text{C}$  NMR spectra were recorded on Bruker-AV (400 and 100 MHz, respectively) instrument using  $\text{CDCl}_3$  as solvent. Mass spectra were measured on Agilent 5975 GC-MS instrument (EI). High-resolution mass spectra (ESI) were obtained with the Thermo Scientific LTQ Orbitrap XL mass spectrometer. The structures of known compounds were further corroborated by comparing their  $^1\text{H}$  NMR,  $^{13}\text{C}$  NMR data and HRMS data with those in literature. Melting points were measured with a YUHUA X-5 melting point instrument and were uncorrected.

## 2. Experiment section

### 2.1 Typical experimental procedure for the acylation

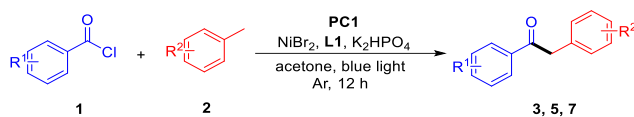

To a Schlenk tube was added **1** (0.2 mmol), **2** (0.4 mmol, 2.0 equiv), **PC1** (0.004 mmol, 2 mol%), NiBr<sub>2</sub> (0.01 mmol, 5 mol%), **L1** (0.01 mmol, 5 mol%), K<sub>2</sub>HPO<sub>4</sub> (0.4 mmol, 2.0 equiv), acetone (3 mL). Then the mixture was stirred at room temperature in argon atmosphere (1 atm) under 35 W blue LED light for 12 h until complete consumption of starting material as monitored by TLC and GC-MS analysis. After the reaction was finished, the reaction mixture was washed with brine. The aqueous phase was re-extracted with EtOAc (3×10 mL). The combined organic extracts were dried over Na<sub>2</sub>SO<sub>4</sub> and concentrated in vacuum. The residue was purified by silica gel flash column chromatography (hexane/ethyl acetate = 100 : 1 to 20 : 1) to afford the desired products **3**, **5** and **7**.

### 2.2 Optimization of reaction conditions

Table S1.

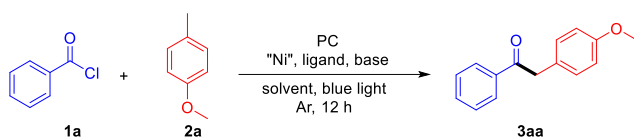

| Entry          | [PC]       | [Ni]                                               | Ligand    | Base                            | Additive | Solvent | Yield (%) <sup>b</sup> |
|----------------|------------|----------------------------------------------------|-----------|---------------------------------|----------|---------|------------------------|
| 1              | <b>PC1</b> | NiBr <sub>2</sub>                                  | <b>L1</b> | K <sub>2</sub> HPO <sub>4</sub> | —        | acetone | 83                     |
| 2              | —          | NiBr <sub>2</sub>                                  | <b>L1</b> | K <sub>2</sub> HPO <sub>4</sub> | —        | acetone | 0                      |
| 3 <sup>c</sup> | <b>PC1</b> | NiBr <sub>2</sub>                                  | <b>L1</b> | K <sub>2</sub> HPO <sub>4</sub> | —        | acetone | 0                      |
| 4              | <b>PC1</b> | —                                                  | <b>L1</b> | K <sub>2</sub> HPO <sub>4</sub> | —        | acetone | 42                     |
| 5              | <b>PC1</b> | NiBr <sub>2</sub>                                  | —         | K <sub>2</sub> HPO <sub>4</sub> | —        | acetone | 43                     |
| 6              | <b>PC2</b> | NiBr <sub>2</sub>                                  | <b>L1</b> | K <sub>2</sub> HPO <sub>4</sub> | —        | acetone | 0                      |
| 7              | <b>PC3</b> | NiBr <sub>2</sub>                                  | <b>L1</b> | K <sub>2</sub> HPO <sub>4</sub> | —        | acetone | 0                      |
| 8              | <b>PC4</b> | NiBr <sub>2</sub>                                  | <b>L1</b> | K <sub>2</sub> HPO <sub>4</sub> | —        | acetone | 0                      |
| 9              | <b>PC5</b> | NiBr <sub>2</sub>                                  | <b>L1</b> | K <sub>2</sub> HPO <sub>4</sub> | —        | acetone | 0                      |
| 10             | <b>PC6</b> | NiBr <sub>2</sub>                                  | <b>L1</b> | K <sub>2</sub> HPO <sub>4</sub> | —        | acetone | 43                     |
| 11             | <b>PC1</b> | NiCl <sub>2</sub>                                  | <b>L1</b> | K <sub>2</sub> HPO <sub>4</sub> | —        | acetone | 49                     |
| 12             | <b>PC1</b> | Ni(PPh <sub>3</sub> ) <sub>3</sub> Cl <sub>2</sub> | <b>L1</b> | K <sub>2</sub> HPO <sub>4</sub> | —        | acetone | 35                     |
| 13             | <b>PC1</b> | Ni(acac) <sub>2</sub>                              | <b>L1</b> | K <sub>2</sub> HPO <sub>4</sub> | —        | acetone | 42                     |
| 14             | <b>PC1</b> | NiI <sub>2</sub>                                   | <b>L1</b> | K <sub>2</sub> HPO <sub>4</sub> | —        | acetone | 28                     |
| 15             | <b>PC1</b> | Ni(OTf) <sub>2</sub>                               | <b>L1</b> | K <sub>2</sub> HPO <sub>4</sub> | —        | acetone | 37                     |
| 16             | <b>PC1</b> | Ni(OAc) <sub>2</sub>                               | <b>L1</b> | K <sub>2</sub> HPO <sub>4</sub> | —        | acetone | 40                     |
| 17             | <b>PC1</b> | NiF <sub>2</sub>                                   | <b>L1</b> | K <sub>2</sub> HPO <sub>4</sub> | —        | acetone | 31                     |
| 18             | <b>PC1</b> | Ni(COD) <sub>2</sub>                               | <b>L1</b> | K <sub>2</sub> HPO <sub>4</sub> | —        | acetone | 38                     |

|    |     |                      |    |                                 |                    |                    |       |
|----|-----|----------------------|----|---------------------------------|--------------------|--------------------|-------|
| 19 | PC1 | NiBr <sub>2</sub>    | L2 | K <sub>2</sub> HPO <sub>4</sub> | —                  | acetone            | 61    |
| 20 | PC1 | NiBr <sub>2</sub>    | L3 | K <sub>2</sub> HPO <sub>4</sub> | —                  | acetone            | 55    |
| 21 | PC1 | NiBr <sub>2</sub>    | L4 | K <sub>2</sub> HPO <sub>4</sub> | —                  | acetone            | 79    |
| 22 | PC1 | NiBr <sub>2</sub>    | L1 | <sup>t</sup> BuONa              | —                  | acetone            | trace |
| 23 | PC1 | NiBr <sub>2</sub>    | L1 | Cs <sub>2</sub> CO <sub>3</sub> | —                  | acetone            | trace |
| 24 | PC1 | NiBr <sub>2</sub>    | L1 | pyridine                        | —                  | acetone            | 51    |
| 25 | PC1 | NiBr <sub>2</sub>    | L1 | KH <sub>2</sub> PO <sub>4</sub> | —                  | acetone            | 62    |
| 26 | PC1 | NiBr <sub>2</sub>    | L1 | K <sub>2</sub> HPO <sub>4</sub> | —                  | CH <sub>3</sub> CN | 66    |
| 27 | PC1 | NiBr <sub>2</sub>    | L1 | K <sub>2</sub> HPO <sub>4</sub> | —                  | THF                | trace |
| 28 | PC1 | NiBr <sub>2</sub>    | L1 | K <sub>2</sub> HPO <sub>4</sub> | —                  | DMF                | 0     |
| 29 | PC1 | NiBr <sub>2</sub>    | L1 | K <sub>2</sub> HPO <sub>4</sub> | —                  | DMSO               | 0     |
| 30 | PC1 | NiBr <sub>2</sub>    | L1 | K <sub>2</sub> HPO <sub>4</sub> | —                  | DCE                | 50    |
| 31 | PC1 | NiBr <sub>2</sub>    | L1 | K <sub>2</sub> HPO <sub>4</sub> | NH <sub>4</sub> Br | acetone            | 74    |
| 32 | PC1 | NiCl <sub>2</sub>    | L1 | K <sub>2</sub> HPO <sub>4</sub> | NH <sub>4</sub> Br | acetone            | 84    |
| 33 | PC1 | Ni(COD) <sub>2</sub> | L1 | K <sub>2</sub> HPO <sub>4</sub> | NH <sub>4</sub> Br | acetone            | 59    |
| 34 | PC1 | NiCl <sub>2</sub>    | L1 | K <sub>2</sub> HPO <sub>4</sub> | LiBr               | acetone            | 65    |
| 35 | PC1 | NiCl <sub>2</sub>    | L1 | K <sub>2</sub> HPO <sub>4</sub> | TBAB               | acetone            | 58    |
| 36 | PC1 | NiCl <sub>2</sub>    | L1 | K <sub>2</sub> HPO <sub>4</sub> | NaBr               | acetone            | 75    |
| 37 | PC1 | NiCl <sub>2</sub>    | L1 | K <sub>2</sub> HPO <sub>4</sub> | LiCl               | acetone            | 55    |
| 38 | PC1 | NiCl <sub>2</sub>    | L1 | K <sub>2</sub> HPO <sub>4</sub> | NH <sub>4</sub> I  | acetone            | 0     |

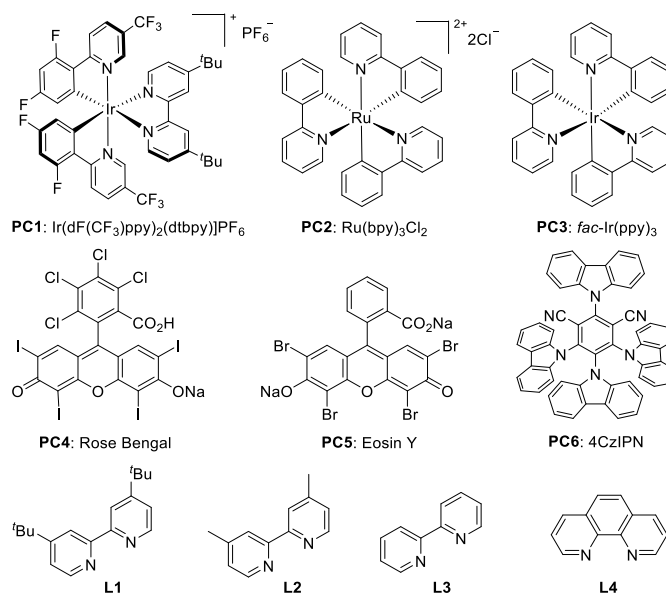

<sup>a</sup> Reaction conditions: **1a** (0.2 mmol), **2a** (0.4 mmol, 2.0 equiv), photocatalyst (0.004 mmol, 2 mol%), “Ni” catalysts (0.01 mmol, 5 mol%), ligand (0.01 mmol, 5 mol%), base (0.4 mmol, 2.0 equiv), additive (0.1 mmol, 50 mol%), solvent (3 mL). Then the mixture was stirred at room temperature in Ar atmosphere (1 atm) under 35 W blue LED light for 12 h at room temperature. <sup>b</sup> Isolated yields. <sup>c</sup> Without additional light.

### 2.3 Scale-up experiment

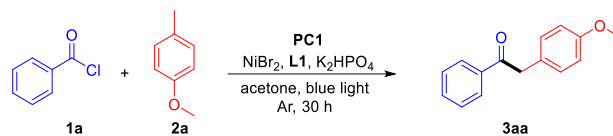

A 50 mL Schlenk tube was added **1a** (2.0 mmol), **2a** (4 mmol, 2.0 equiv), **PC1** (0.04 mmol, 2 mol%), NiBr<sub>2</sub> (0.1 mmol, 5 mol%), **L1** (0.1 mmol, 5 mol%), K<sub>2</sub>HPO<sub>4</sub> (4 mmol, 2.0 equiv), acetone (20 mL). Then the mixture was stirred at room temperature in argon atmosphere (1 atm) under 35 W blue LED light for 30 h. After the reaction was finished, the reaction mixture was washed with brine. The aqueous phase was re-extracted with EtOAc (3×10 mL). The combined organic extracts were dried over Na<sub>2</sub>SO<sub>4</sub> and concentrated in vacuum. The residue was purified by silica gel flash column chromatography (hexane/ethyl acetate = 10 : 1) to afford the desired products **3aa** in 69% yield.

### 3. Mechanistic studies

#### 3.1 Radical trapping experiments

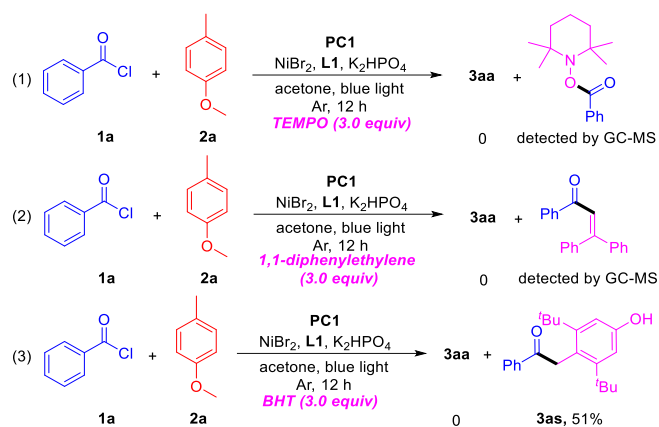

Three reactions of radical trapping experiments were performed. A solution of TEMPO (3.0 equiv, 0.6 mmol), BHT (3 equiv, 0.6 mmol) or 1,1-diphenylethene (3 equiv, 0.6 mmol), **1a** (0.2 mmol), **2a** (0.4 mmol, 2.0 equiv), **PC1** (0.004 mmol, 2 mol%), NiBr<sub>2</sub> (0.01 mmol, 5 mol%), **L1** (0.01 mmol, 5 mol%), K<sub>2</sub>HPO<sub>4</sub> (0.4 mmol, 2.0 equiv), acetone (3 mL). Then the mixture was stirred at room temperature in argon atmosphere (1 atm) under 35 W blue LED light for 12 h. The benzylations were completely quenched and no benzylation products were detected.

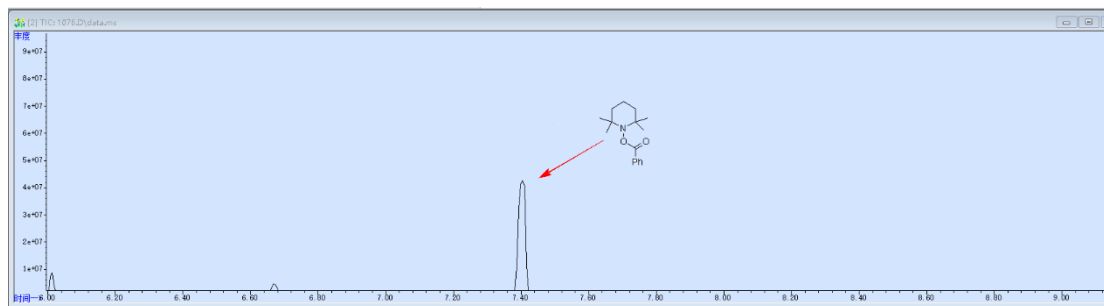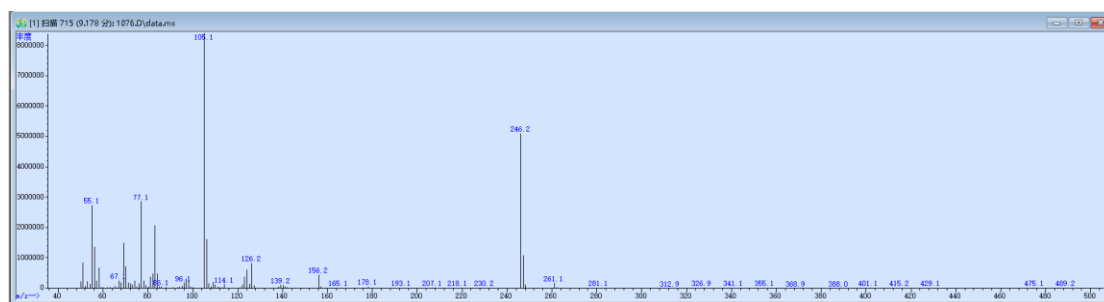

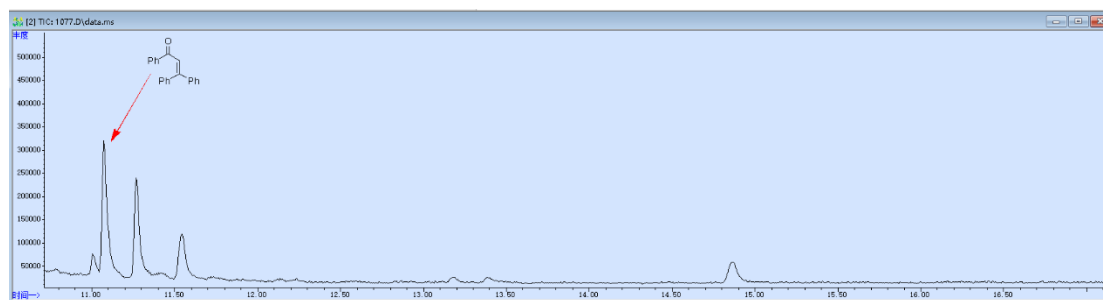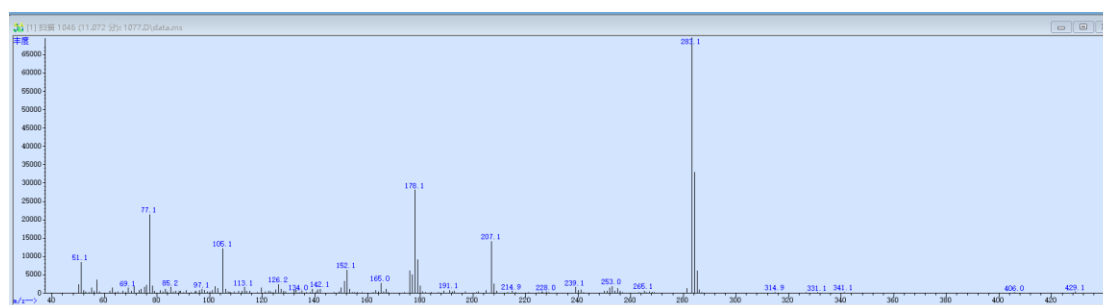

### 3.2 Benzyl radical trapping experiments

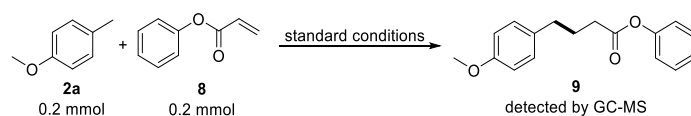

To a Schlenk tube was added **1a** (0.2 mmol), **8** (0.2 mmol, 1.0 equiv), **PC1** (0.004 mmol, 2 mol%), NiBr<sub>2</sub> (0.01 mmol, 5 mol%), **L1** (0.01 mmol, 5 mol%), K<sub>2</sub>HPO<sub>4</sub> (0.4 mmol, 2.0 equiv), acetone (3 mL). Then the mixture was stirred at room temperature in argon atmosphere (1 atm) under 35 W blue LED light for 12 h. Phenyl 4-(4-methoxyphenyl)butanoate (**9**) could be detected by GC-MS.

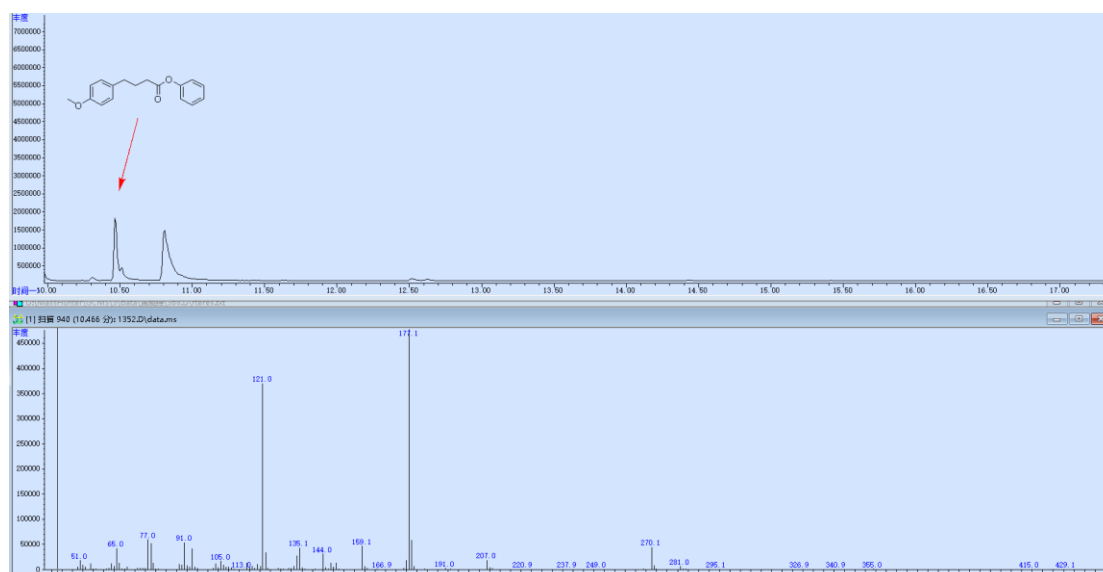

### 3.3 Kinetic isotope effect

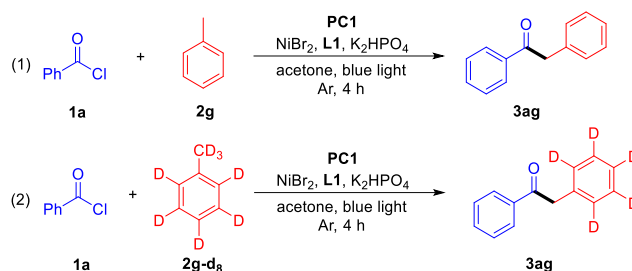

Two parallel reactions of toluene (**2g**) or toluene- $d_8$  (**2g-d<sub>8</sub>**) were performed. A solution of toluene (**2g**, 2.0 equiv), or toluene- $d_8$  (**2g-d<sub>8</sub>**, 2.0 equiv), **1a** (0.2 mmol), **PC1** (0.004 mmol, 2 mol%),  $\text{NiBr}_2$  (0.01 mmol, 5 mol%), **L1** (0.01 mmol, 5 mol%),  $\text{K}_2\text{HPO}_4$  (0.4 mmol, 2.0 equiv), acetone (3 mL). Then the mixture was stirred at room temperature in Ar atmosphere (1 atm) under 35 W blue LED light for 4 h. The aqueous phase was re-extracted with EtOAc (3×10 mL). The combined organic extracts were dried over  $\text{Na}_2\text{SO}_4$  and concentrated in vacuum. The solvent was removed on a rotary evaporator under reduced pressure. The residue was measured by GC, and the product **3ag** in 26% yield and **3ag-d<sub>7</sub>** in 4% yield by using dodecane as the internal standard.

### 3.4 Light on/off experiment

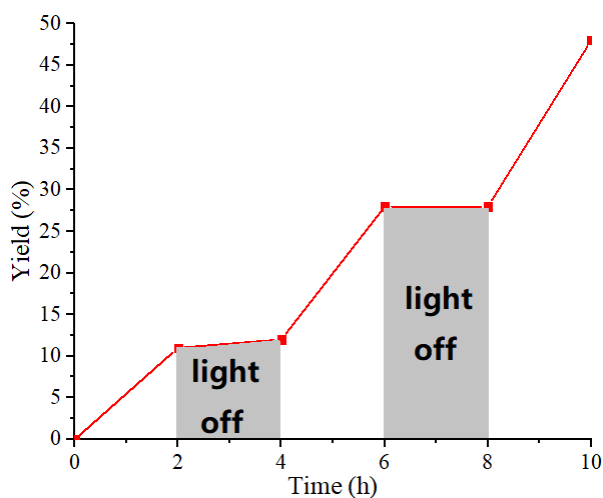

### 3.5 Stern–Volmer quenching<sup>1</sup>

**Formulation solution:** Benzoyl chloride (**1a**, 351.4 mg) was dissolved in acetone in a 25 mL volumetric flask to set the concentration to be 0.1 M. 1-methoxy-4-methylbenzene (**2a**, 315  $\mu\text{L}$ ) was dissolved in acetone in a 25 mL volumetric flask to set the concentration to be 0.5 M.  $\text{NiBr}_2$  (13.6 mg) was dissolved in acetone in a 10 mL volumetric flask to set the concentration to be 0.005 M. **L1** (6.7 mg) was dissolved in acetone in a 5 mL volumetric flask to set the concentration to be 0.005 M. Photocatalyst  $\text{Ir}[\text{dF}(\text{CF}_3)\text{ppy}]_2(\text{dtbbpy})\text{PF}_6$  (2.8 mg) was dissolved in acetone (25.0 mL) to set the concentration to be



0.1 mM.

**Experimental procedure:** The resulting 0.1 M solution (50  $\mu\text{L}$ ) was added to cuvette to obtain different concentrations of catalyst solution. This solution was then diluted to a volume of 2.0 mL by adding further solvent (acetone) to prepare a 2.5  $\mu\text{M}$  solution. The resulting mixture was sparged with nitrogen for 3 minutes and then irradiated at 425 nm. Fluorescence emission spectra were recorded (3 trials per sample). Into this solution, 20.0  $\mu\text{L}$  of a benzoyl chloride solution was successively added and uniformly stirred, and the resulting mixture was bubbled with nitrogen for 3 minutes and irradiated at 425 nm. Fluorescence emission spectra of 0  $\mu\text{L}$ , 20.0  $\mu\text{L}$ , 40.0  $\mu\text{L}$ , 60.0  $\mu\text{L}$ , 80.0  $\mu\text{L}$ , 100.0  $\mu\text{L}$ , fluorescence intensity. Follow this method and make changes to the amount to obtain the Stern–Volmer relationship in turn.

(a)  $\text{Ir}[\text{dF}(\text{CF}_3)\text{ppy}]_2(\text{dtbbpy})\text{PF}_6$  quenched by **1a** in acetone.

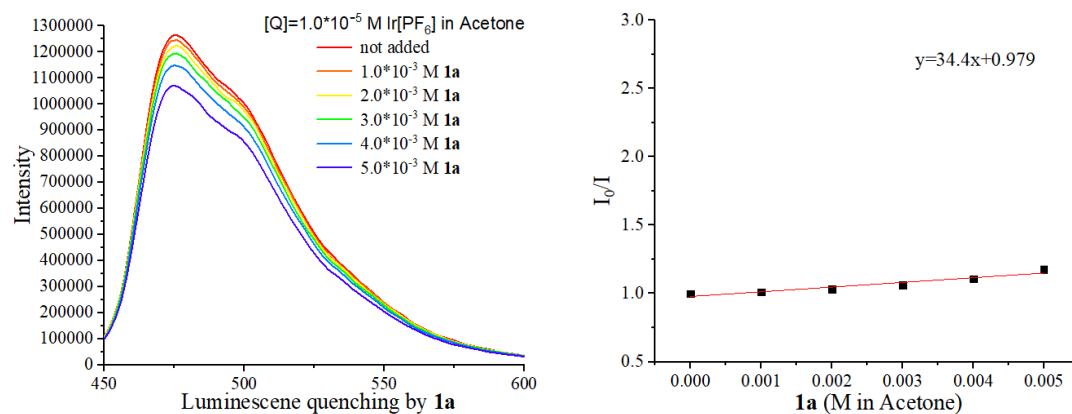

The emission intensity of the  $\text{Ir}[\text{dF}(\text{CF}_3)\text{ppy}]_2(\text{dtbbpy})\text{PF}_6$  catalyst solution slightly affected by the gradual increase of the amount of **1a**.

(b)  $\text{Ir}[\text{dF}(\text{CF}_3)\text{ppy}]_2(\text{dtbbpy})\text{PF}_6$  quenched by **2a** in acetone. Linear quenching is not observed.

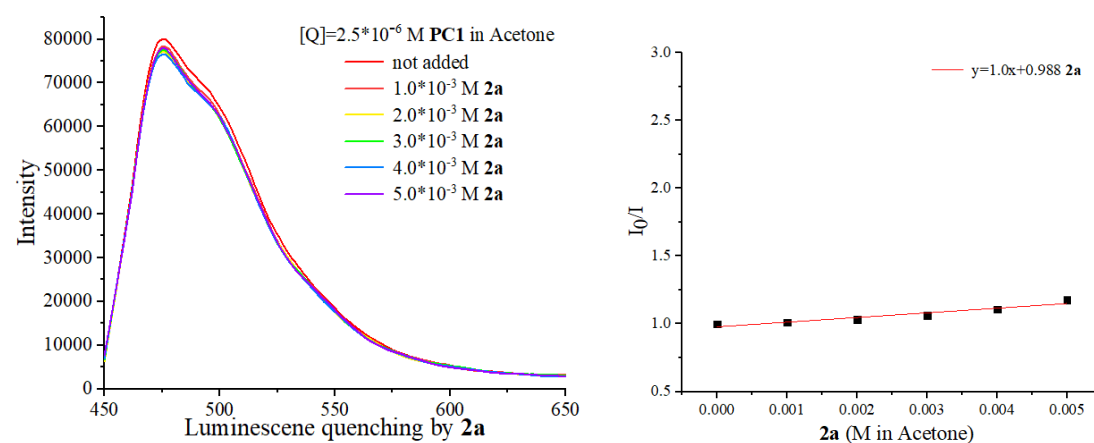

(c) Ir[dF(CF<sub>3</sub>)ppy]<sub>2</sub>(dtbbpy)PF<sub>6</sub> quenched by NiBr<sub>2</sub> in acetone.

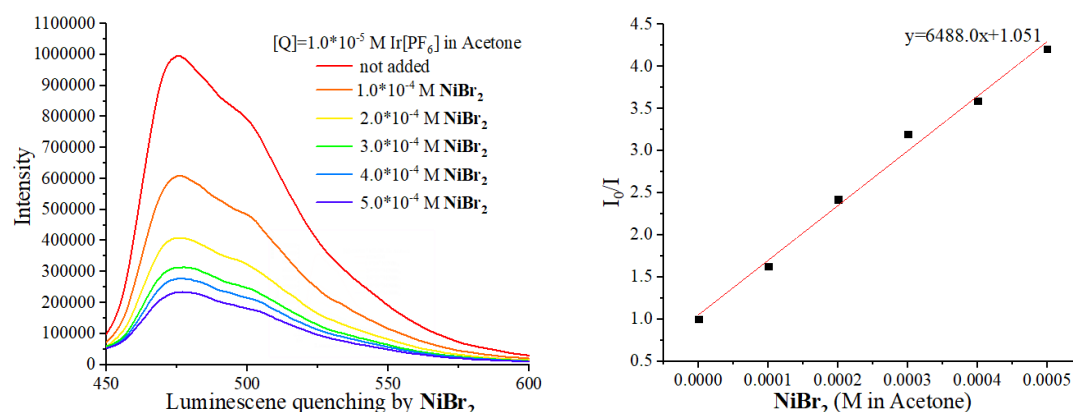

The emission intensity of the Ir[dF(CF<sub>3</sub>)ppy]<sub>2</sub>(dtbbpy)PF<sub>6</sub> catalyst solution strongly affected by the gradual increase of the amount of NiBr<sub>2</sub>.

(d) Ir[dF(CF<sub>3</sub>)ppy]<sub>2</sub>(dtbbpy)PF<sub>6</sub> quenched by NiBr<sub>2</sub>•dtbbpy in acetone.

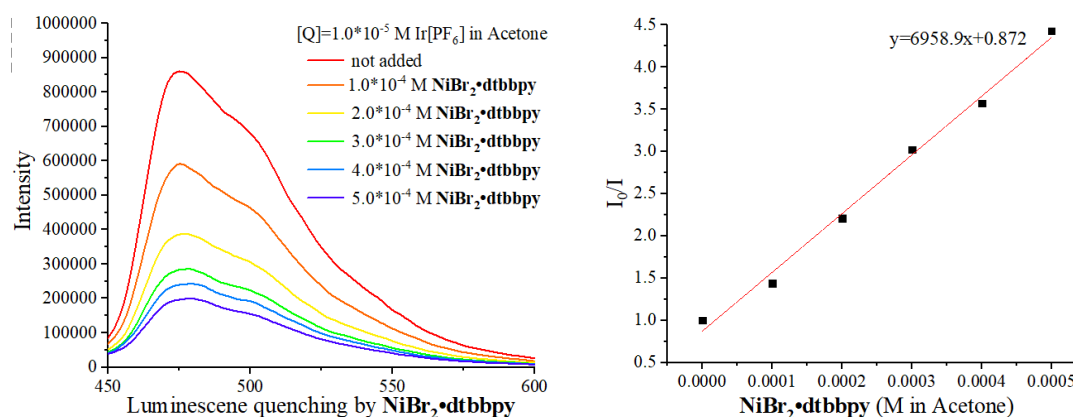

The emission intensity of the Ir[dF(CF<sub>3</sub>)ppy]<sub>2</sub>(dtbbpy)PF<sub>6</sub> catalyst solution strongly affected by the gradual increase of the amount of NiBr<sub>2</sub>•dtbbpy.

(e) Ir[dF(CF<sub>3</sub>)ppy]<sub>2</sub>(dtbbpy)PF<sub>6</sub> quenched by NiBr<sub>2</sub>•dtbbpy+1a+2a in acetone.

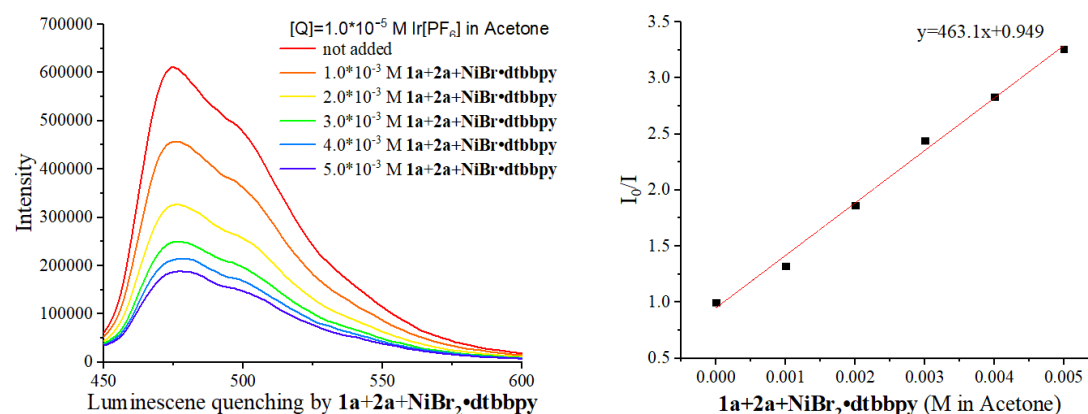

(f) Ir[dF(CF<sub>3</sub>)ppy]<sub>2</sub>(dtbbpy)PF<sub>6</sub> quenched by NH<sub>4</sub>Br in acetone

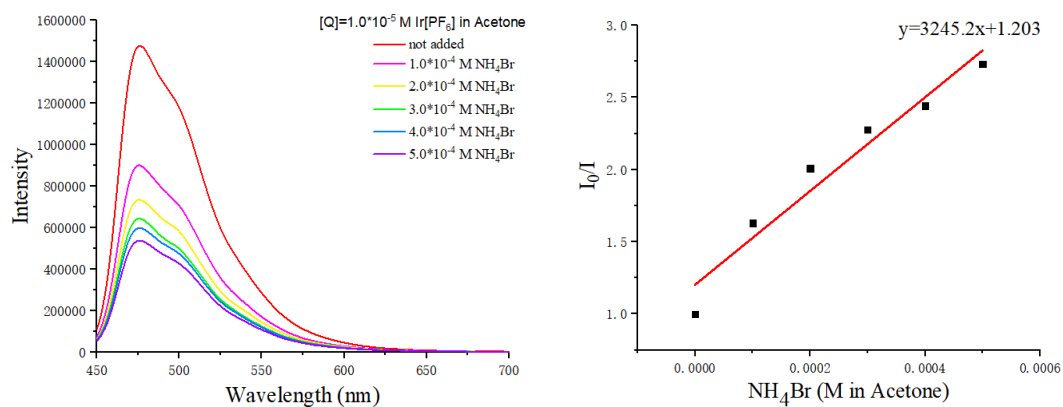

The emission intensity of the Ir[dF(CF<sub>3</sub>)ppy]<sub>2</sub>(dtbbpy)PF<sub>6</sub> catalyst solution strongly affected by the gradual increase of the amount of NH<sub>4</sub>Br.

#### 4. Analytical data

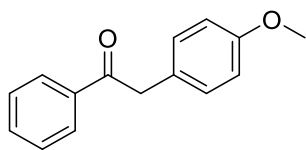

##### 2-(4-Methoxyphenyl)-1-phenylethan-1-one (3aa)

Yield: 37.5 mg, 83%; colorless oil;  $^1\text{H NMR}$  (400 MHz,  $\text{CDCl}_3$ )  $\delta$ : 8.01 (d,  $J = 7.5$  Hz, 2H), 7.55 (t,  $J = 7.4$  Hz, 1H), 7.45 (t,  $J = 7.6$  Hz, 2H), 7.18 (d,  $J = 8.5$  Hz, 2H), 6.87 (d,  $J = 8.6$  Hz, 2H), 4.23 (s, 2H), 3.78 (s, 3H);  $^{13}\text{C NMR}$  (100 MHz,  $\text{CDCl}_3$ )  $\delta$ : 197.9, 158.5, 136.5, 133.1, 130.4, 128.6, 128.6, 126.4, 114.1, 55.2, 44.6.

These spectroscopic data correspond to reported data.<sup>[2]</sup>

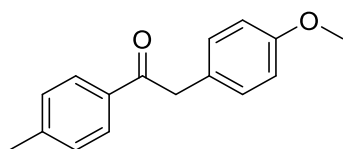

##### 2-(4-Methoxyphenyl)-1-(p-tolyl)ethan-1-one (3ba)

Yield: 40.3 mg, 84%; colorless oil;  $^1\text{H NMR}$  (400 MHz,  $\text{CDCl}_3$ )  $\delta$ : 7.91 (d,  $J = 8.0$  Hz, 2H), 7.24 (d,  $J = 8.1$  Hz, 2H), 7.18 (d,  $J = 8.6$  Hz, 2H), 6.86 (d,  $J = 8.6$  Hz, 2H), 4.19 (s, 2H), 3.77 (s, 3H), 2.39 (s, 3H);  $^{13}\text{C NMR}$  (100 MHz,  $\text{CDCl}_3$ )  $\delta$ : 197.6, 158.4, 143.9, 134.0, 130.4, 129.3, 128.7, 126.7, 114.0, 55.2, 44.5, 21.6.

These spectroscopic data correspond to reported data.<sup>[3]</sup>

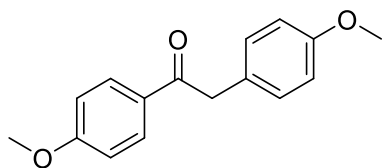

##### 1,2-Bis(4-methoxyphenyl)ethan-1-one (3ca)

Yield: 45.1 mg, 88%; colorless oil;  $^1\text{H NMR}$  (400 MHz,  $\text{CDCl}_3$ )  $\delta$ : 7.99 (d,  $J = 8.9$  Hz, 2H), 7.18 (d,  $J = 8.6$  Hz, 2H), 6.92 (d,  $J = 8.9$  Hz, 2H), 6.86 (d,  $J = 8.6$  Hz, 2H), 4.17 (s, 2H), 3.85 (s, 3H), 3.78 (s, 3H);  $^{13}\text{C NMR}$  (100 MHz,  $\text{CDCl}_3$ )  $\delta$ : 196.5, 163.4, 158.4, 130.9, 130.3, 129.5, 126.9, 114.0, 113.7, 55.4, 55.2, 44.3.

These spectroscopic data correspond to reported data.<sup>[3]</sup>

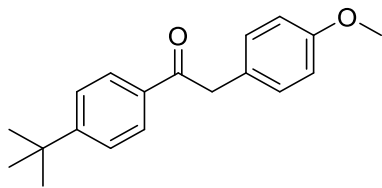

**1-(4-(*tert*-Butyl)phenyl)-2-(4-methoxyphenyl)ethan-1-one (3da)**

Yield: 49.1 mg, 87%; colorless oil;  $^1\text{H NMR}$  (400 MHz,  $\text{CDCl}_3$ )  $\delta$ : 7.96 (d,  $J = 8.2$  Hz, 2H), 7.47 (d,  $J = 8.1$  Hz, 2H), 7.19 (d,  $J = 8.2$  Hz, 2H), 6.87 (d,  $J = 8.2$  Hz, 2H), 4.21 (s, 2H), 3.79 (s, 3H), 1.33 (s, 9H);  $^{13}\text{C NMR}$  (100 MHz,  $\text{CDCl}_3$ )  $\delta$ : 197.5, 158.4, 156.8, 134.0, 130.4, 128.6, 126.7, 125.5, 114.1, 55.2, 44.5, 35.1, 31.0.

These spectroscopic data correspond to reported data.<sup>[4]</sup>

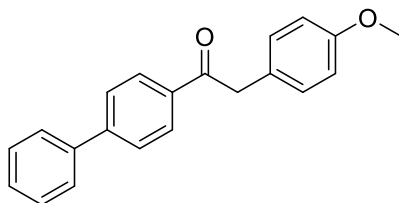

**1-([1,1'-Biphenyl]-4-yl)-2-(4-methoxyphenyl)ethan-1-one (3ea)**

Yield: 48.9 mg, 81%; colorless oil;  $^1\text{H NMR}$  (400 MHz,  $\text{CDCl}_3$ )  $\delta$ : 8.08 (d,  $J = 7.9$  Hz, 2H), 7.67 (d,  $J = 7.8$  Hz, 2H), 7.62 (d,  $J = 7.1$  Hz, 2H), 7.47 (t,  $J = 7.2$  Hz, 2H), 7.43 – 7.36 (m, 1H), 7.21 (d,  $J = 7.8$  Hz, 2H), 6.88 (d,  $J = 7.6$  Hz, 2H), 4.26 (s, 2H), 3.79 (s, 3H);  $^{13}\text{C NMR}$  (100 MHz,  $\text{CDCl}_3$ )  $\delta$ : 197.5, 158.5, 145.7, 139.8, 135.2, 130.4, 129.2, 128.9, 128.2, 127.2, 127.2, 126.5, 114.1, 55.2, 44.7. HRMS (ESI)  $m/z$  calcd for  $\text{C}_{21}\text{H}_{18}\text{O}_2\text{Na}$  ( $\text{M}+\text{Na}$ ) $^+$  325.1199, found 325.1208.

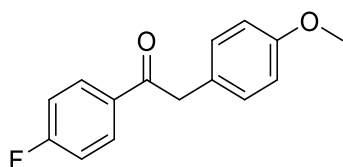

**1-(4-Fluorophenyl)-2-(4-methoxyphenyl)ethan-1-one (3fa)**

Yield: 37.6 mg, 77%; colorless oil;  $^1\text{H NMR}$  (400 MHz,  $\text{CDCl}_3$ )  $\delta$ : 8.08 – 7.99 (m, 2H), 7.17 (d,  $J = 8.6$  Hz, 2H), 7.12 (t,  $J = 8.6$  Hz, 2H), 6.87 (d,  $J = 8.6$  Hz, 2H), 4.20 (s, 2H), 3.78 (s, 3H);  $^{13}\text{C NMR}$  (100 MHz,  $\text{CDCl}_3$ )  $\delta$ : 196.3, 165.7 (d,  $J = 253.3$  Hz), 158.5, 132.9 (d,  $J = 3.0$  Hz), 131.2 (d,  $J = 9.2$  Hz), 130.4, 126.2, 115.7 (d,  $J = 21.7$  Hz), 114.2, 55.2, 44.6.

These spectroscopic data correspond to reported data.<sup>[5]</sup>

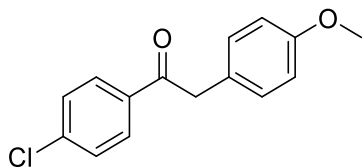

**1-(4-Chlorophenyl)-2-(4-methoxyphenyl)ethan-1-one (3ga)**

Yield: 37.4 mg, 72%; colorless oil;  $^1\text{H NMR}$  (400 MHz,  $\text{CDCl}_3$ )  $\delta$ : 7.94 (d,  $J = 8.6$  Hz, 2H), 7.42 (d,  $J = 8.6$  Hz, 2H), 7.16 (d,  $J = 8.6$  Hz, 2H), 6.87 (d,  $J = 8.6$  Hz, 2H), 4.19 (s, 2H), 3.78 (s, 3H);  $^{13}\text{C NMR}$  (100 MHz,  $\text{CDCl}_3$ )  $\delta$ : 196.7, 158.6, 139.5, 134.8, 130.4, 130.0, 128.9, 126.0, 114.2, 55.2, 44.6.

These spectroscopic data correspond to reported data.<sup>[6]</sup>

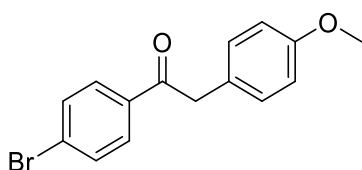

**1-(4-Bromophenyl)-2-(4-methoxyphenyl)ethan-1-one**

Yield: 40.1 mg, 66%; colorless oil;  $^1\text{H NMR}$  (400 MHz,  $\text{CDCl}_3$ )  $\delta$ : 7.94 (d,  $J = 8.6$  Hz, 1H), 7.86 (d,  $J = 8.6$  Hz, 1H), 7.59 (d,  $J = 8.6$  Hz, 1H), 7.42 (d,  $J = 8.6$  Hz, 1H), 7.16 (d,  $J = 7.8$  Hz, 2H), 6.87 (d,  $J = 8.6$  Hz, 2H), 4.19 (s, 2H), 3.79 (s, 3H);  $^{13}\text{C NMR}$  (100 MHz,  $\text{CDCl}_3$ )  $\delta$ : 196.7, 158.6, 139.5, 134.8, 130.4, 130.0, 128.9, 126.0, 114.2, 55.2, 44.6.

These spectroscopic data correspond to reported data.<sup>[5]</sup>

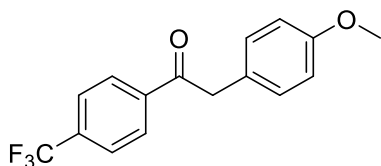

**2-(4-Methoxyphenyl)-1-(4-(trifluoromethyl)phenyl)ethan-1-one (3ia)**

Yield: 30.0 mg, 51%; colorless oil;  $^1\text{H NMR}$  (400 MHz,  $\text{CDCl}_3$ )  $\delta$ : 8.10 (d,  $J = 7.5$  Hz, 2H), 7.72 (d,  $J = 7.6$  Hz, 2H), 7.17 (d,  $J = 7.2$  Hz, 2H), 6.88 (d,  $J = 6.7$  Hz, 2H), 4.25 (s, 2H), 3.79 (s, 3H);  $^{13}\text{C NMR}$  (100 MHz,  $\text{CDCl}_3$ )  $\delta$ : 196.9, 158.7, 139.15, 134.3 (q,  $J = 32.5$  Hz), 130.4, 128.9, 125.6 (d,  $J = 11.2$  Hz), 125.6 (d,  $J = 3.6$  Hz), 123.5 (d,  $J = 270.9$  Hz), 114.24, 55.19, 44.92.

These spectroscopic data correspond to reported data.<sup>[5]</sup>

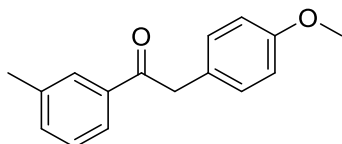

### 2-(4-Methoxyphenyl)-1-(m-tolyl)ethan-1-one (3ja)

Yield: 35.5 mg, 74%; colorless oil;  $^1\text{H}$  NMR (400 MHz,  $\text{CDCl}_3$ )  $\delta$ : 7.80 (d,  $J = 8.4$  Hz, 2H), 7.37-7.31 (m, 2H), 7.18 (d,  $J = 8.1$  Hz, 2H), 6.86 (d,  $J = 8.1$  Hz, 2H), 4.21 (s, 2H), 3.78 (s, 3H), 2.40 (s, 3H);  $^{13}\text{C}$  NMR (100 MHz,  $\text{CDCl}_3$ )  $\delta$ : 198.1, 158.4, 138.4, 136.6, 133.8, 130.6, 129.0, 128.4, 126.5, 125.8, 114.1, 55.2, 44.6, 21.4.

These spectroscopic data correspond to reported data.<sup>[3]</sup>

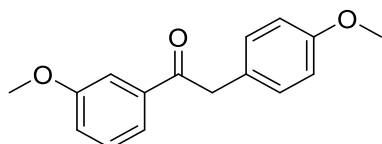

### 1-(3-Methoxyphenyl)-2-(4-methoxyphenyl)ethan-1-one (3ka)

Yield: 39.4 mg, 77%; colorless oil;  $^1\text{H}$  NMR (400 MHz,  $\text{CDCl}_3$ )  $\delta$ : 7.60 (d,  $J = 7.7$  Hz, 1H), 7.52 (s, 1H), 7.36 (t,  $J = 7.9$  Hz, 1H), 7.18 (d,  $J = 8.5$  Hz, 2H), 7.10 (d,  $J = 7.5$  Hz, 1H), 6.86 (d,  $J = 8.6$  Hz, 2H), 4.21 (s, 2H), 3.83 (s, 3H), 3.78 (s, 3H);  $^{13}\text{C}$  NMR (100 MHz,  $\text{CDCl}_3$ )  $\delta$ : 197.7, 159.8, 158.5, 137.9, 130.4, 129.5, 126.4, 121.2, 119.5, 114.1, 112.8, 55.4, 55.2, 44.7. HRMS (ESI)  $m/z$  calcd for  $\text{C}_{16}\text{H}_{16}\text{O}_3\text{Na}$  ( $\text{M}+\text{Na}$ ) $^+$  279.0992, found 279.0999.

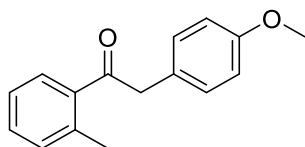

### 2-(4-Methoxyphenyl)-1-(o-tolyl)ethan-1-one (3la)

Yield: 32.2 mg, 67%; colorless oil;  $^1\text{H}$  NMR (400 MHz,  $\text{CDCl}_3$ )  $\delta$ : 7.71 (d,  $J = 7.6$  Hz, 1H), 7.36 (t,  $J = 7.4$  Hz, 1H), 7.24 (q,  $J = 7.7, 7.3$  Hz, 2H), 7.14 (d,  $J = 8.5$  Hz, 2H), 6.86 (d,  $J = 8.6$  Hz, 2H), 4.15 (s, 2H), 3.78 (s, 3H), 2.43 (s, 3H);  $^{13}\text{C}$  NMR (100 MHz,  $\text{CDCl}_3$ )  $\delta$ : 201.8, 158.5, 138.4, 137.6, 131.9, 131.2, 130.5, 128.5, 126.4, 125.6, 114.0, 55.2, 47.5, 21.2.

These spectroscopic data correspond to reported data.<sup>[7]</sup>

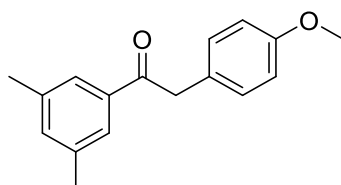

### 1-(3,5-Dimethylphenyl)-2-(4-methoxyphenyl)ethan-1-one (3ma)

Yield: 36.1 mg, 71%; colorless oil;  $^1\text{H}$  NMR (400 MHz,  $\text{CDCl}_3$ )  $\delta$ : 7.61 (s, 2H), 7.17 (d,  $J = 8.7$  Hz, 3H), 6.86 (d,  $J = 8.6$  Hz, 2H), 4.20 (s, 2H), 3.78 (s, 3H), 2.36 (s, 6H);  $^{13}\text{C}$  NMR (100 MHz,  $\text{CDCl}_3$ )  $\delta$ : 198.3,

158.4, 138.2, 136.7, 134.7, 130.4, 126.6, 126.3, 114.0, 55.2, 44.6, 21.2. HRMS (ESI)  $m/z$  calcd for  $C_{17}H_{18}O_2Na$  ( $M+Na$ )<sup>+</sup> 277.1199, found 277.1206.

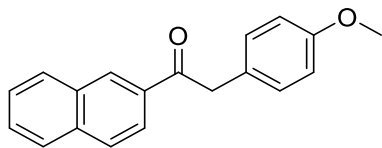

### 2-(4-Methoxyphenyl)-1-(naphthalen-2-yl)ethan-1-one (3na)

Yield: 36.4 mg, 66%; colorless oil; <sup>1</sup>H NMR (400 MHz, CDCl<sub>3</sub>) δ: 8.55 (s, 1H), 8.06 (dd,  $J = 8.7, 1.8$  Hz, 1H), 7.97 (d,  $J = 8.4$  Hz, 1H), 7.88 (t,  $J = 8.4$  Hz, 2H), 7.62 – 7.53 (m, 2H), 7.24 (d,  $J = 8.6$  Hz, 2H), 6.88 (d,  $J = 8.6$  Hz, 2H), 4.36 (s, 2H), 3.78 (s, 3H); <sup>13</sup>C NMR (100 MHz, CDCl<sub>3</sub>) δ: 197.9, 158.5, 135.5, 133.9, 132.5, 130.5, 130.3, 129.6, 128.5, 128.5, 127.7, 126.8, 126.6, 124.3, 114.1, 55.2, 44.7.

These spectroscopic data correspond to reported data.<sup>[5]</sup>

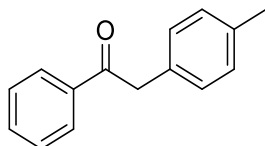

### 1-Phenyl-2-(*p*-tolyl)ethan-1-one (3ab)

Yield: 32.8 mg, 78%; colorless oil; <sup>1</sup>H NMR (400 MHz, CDCl<sub>3</sub>) δ: 8.01 (d,  $J = 7.0$  Hz, 2H), 7.59 – 7.51 (m, 1H), 7.45 (t,  $J = 7.6$  Hz, 2H), 7.21 – 7.07 (m, 4H), 4.25 (s, 2H), 2.32 (s, 3H); <sup>13</sup>C NMR (100 MHz, CDCl<sub>3</sub>) δ: 197.8, 136.6, 136.5, 133.1, 131.4, 129.4, 129.3, 128.6, 128.6, 45.1, 21.1.

These spectroscopic data correspond to reported data.<sup>[2]</sup>

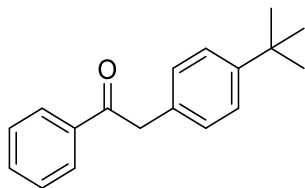

### 2-(4-*tert*-Butylphenyl)-1-phenylethan-1-one (3ac)

Yield: 42.4 mg, 84%; colorless oil; <sup>1</sup>H NMR (400 MHz, CDCl<sub>3</sub>) δ: 8.03 (d,  $J = 8.2$  Hz, 2H), 7.55 (t,  $J = 7.3$  Hz, 1H), 7.46 (t,  $J = 7.6$  Hz, 2H), 7.35 (d,  $J = 8.3$  Hz, 2H), 7.20 (d,  $J = 8.3$  Hz, 2H), 4.26 (s, 2H), 1.30 (s, 9H); <sup>13</sup>C NMR (100 MHz, CDCl<sub>3</sub>) δ: 197.8, 149.6, 136.6, 133.1, 131.3, 129.1, 128.6, 128.6, 125.6, 44.9, 34.4, 31.3.

These spectroscopic data correspond to reported data.<sup>[8]</sup>



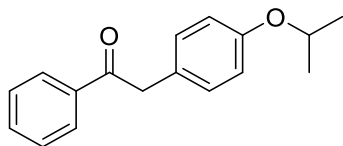

**2-(4-Isopropoxyphenyl)-1-phenylethan-1-one (3ad)**

Yield: 44.2 mg, 87%; colorless oil;  $^1\text{H NMR}$  (400 MHz,  $\text{CDCl}_3$ )  $\delta$ : 8.01 (d,  $J = 7.3$  Hz, 2H), 7.55 (t,  $J = 7.3$  Hz, 1H), 7.45 (t,  $J = 7.6$  Hz, 2H), 7.16 (d,  $J = 8.5$  Hz, 2H), 6.84 (d,  $J = 8.6$  Hz, 2H), 4.50 (p,  $J = 6.1$  Hz, 1H), 4.21 (s, 2H), 1.32 (s, 3H), 1.30 (s, 3H);  $^{13}\text{C NMR}$  (100 MHz,  $\text{CDCl}_3$ )  $\delta$ : 198.0, 156.8, 136.5, 133.0, 130.4, 128.6, 128.6, 126.2, 116.0, 69.8, 44.6, 22.0.

These spectroscopic data correspond to reported data.<sup>[5]</sup>

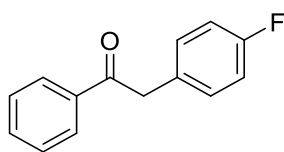

**2-(4-Fluorophenyl)-1-phenylethan-1-one (3ae)**

Yield: 28.7 mg, 67%; colorless oil;  $^1\text{H NMR}$  (400 MHz,  $\text{CDCl}_3$ )  $\delta$ :  $^1\text{H NMR}$  (400 MHz, Chloroform-*d*)  $\delta$  8.01 (d,  $J = 8.1$  Hz, 2H), 7.58 (t,  $J = 7.4$  Hz, 1H), 7.48 (t,  $J = 7.6$  Hz, 2H), 7.2 – 7.21 (m, 2H), 7.02 (t,  $J = 8.7$  Hz, 2H), 4.27 (s, 2H);  $^{13}\text{C NMR}$  (100 MHz,  $\text{CDCl}_3$ )  $\delta$ : 197.4, 161.7 (d,  $J = 243.9$  Hz), 136.4, 133.3, 131.0 (d,  $J = 8.0$  Hz), 130.1 (d,  $J = 3.2$  Hz), 128.7, 128.5, 115.5 (d,  $J = 21.2$  Hz), 44.5.

These spectroscopic data correspond to reported data.<sup>[8]</sup>

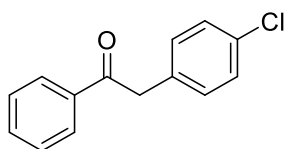

**2-(4-Chlorophenyl)-1-phenylethan-1-one (3af)**

Yield: 29.9 mg, 65%; colorless oil;  $^1\text{H NMR}$  (400 MHz,  $\text{CDCl}_3$ )  $\delta$ : 8.00 (d,  $J = 8.3$  Hz, 2H), 7.58 (t,  $J = 7.4$  Hz, 1H), 7.47 (t,  $J = 7.7$  Hz, 2H), 7.30 (d,  $J = 8.4$  Hz, 2H), 7.19 (d,  $J = 8.3$  Hz, 2H), 4.26 (s, 2H);  $^{13}\text{C NMR}$  (100 MHz,  $\text{CDCl}_3$ )  $\delta$ : 197.1, 136.3, 133.3, 132.9, 132.8, 130.9, 128.8, 128.7, 128.5, 44.7.

These spectroscopic data correspond to reported data.<sup>[2]</sup>

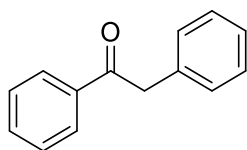

**1,2-Diphenylethan-1-one (3ag)**

Yield: 27.5 mg, 70%; colorless oil;  $^1\text{H}$  NMR (400 MHz,  $\text{CDCl}_3$ )  $\delta$ : 8.01 (d,  $J = 7.0$  Hz, 2H), 7.55 (t,  $J = 7.4$  Hz, 1H), 7.45 (t,  $J = 7.6$  Hz, 2H), 7.37 – 7.29 (m, 2H), 7.29 – 7.21 (m, 3H), 4.29 (s, 2H).  $^{13}\text{C}$  NMR (100 MHz,  $\text{CDCl}_3$ )  $\delta$ : 197.6, 136.5, 134.5, 133.1, 129.4, 128.6, 128.6, 128.6, 126.9, 45.5.

These spectroscopic data correspond to reported data.<sup>[2]</sup>

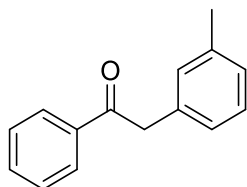

### 1-Phenyl-2-(*m*-tolyl)ethan-1-one (3ah)

Yield: 26.9 mg, 64%; colorless oil;  $^1\text{H}$  NMR (400 MHz,  $\text{CDCl}_3$ )  $\delta$ : 8.01 (d,  $J = 7.0$  Hz, 2H), 7.55 (t,  $J = 7.3$  Hz, 1H), 7.45 (t,  $J = 7.6$  Hz, 2H), 7.21 (t,  $J = 7.5$  Hz, 1H), 7.08 (s, 1H), 7.06 (d,  $J = 9.2$  Hz, 2H), 4.24 (s, 2H), 2.32 (s, 3H);  $^{13}\text{C}$  NMR (100 MHz,  $\text{CDCl}_3$ )  $\delta$ : 197.5, 136.9, 136.8, 133.4, 133.1, 130.3, 130.3, 128.6, 128.3, 127.2, 126.1, 43.5, 19.8.

These spectroscopic data correspond to reported data.<sup>[2]</sup>

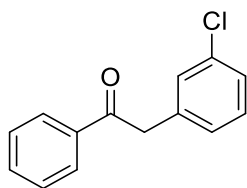

### 2-(3-Chlorophenyl)-1-phenylethan-1-one (3ai)

Yield: 25.3 mg, 55%; colorless oil;  $^1\text{H}$  NMR (400 MHz,  $\text{CDCl}_3$ )  $\delta$ : 8.01 (d,  $J = 7.4$  Hz, 2H), 7.58 (t,  $J = 7.3$  Hz, 1H), 7.48 (t,  $J = 7.7$  Hz, 2H), 7.30 – 7.21 (m, 3H), 7.18 – 7.11 (m, 1H), 4.27 (s, 2H);  $^{13}\text{C}$  NMR (100 MHz,  $\text{CDCl}_3$ )  $\delta$ : 196.8, 136.3, 136.3, 134.4, 133.4, 129.8, 129.6, 128.7, 128.5, 127.7, 127.1, 44.9.

These spectroscopic data correspond to reported data.<sup>[9]</sup>

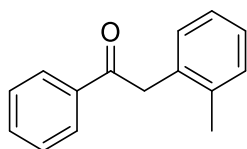

### 1-Phenyl-2-(*o*-tolyl)ethan-1-one (3aj)

Yield: 21.9 mg, 52%; colorless oil;  $^1\text{H}$  NMR (400 MHz,  $\text{CDCl}_3$ )  $\delta$ : 8.03 (d,  $J = 8.1$  Hz, 2H), 7.58 (t,  $J = 7.4$  Hz, 1H), 7.48 (t,  $J = 7.6$  Hz, 2H), 7.23 – 7.09 (m, 4H), 4.31 (s, 2H), 2.26 (s, 3H);  $^{13}\text{C}$  NMR (100 MHz,  $\text{CDCl}_3$ )  $\delta$ : 197.5, 136.9, 136.8, 133.4, 133.1, 130.3, 130.3, 128.6, 128.3, 127.2, 126.1, 43.5, 19.8.

These spectroscopic data correspond to reported data.<sup>[10]</sup>

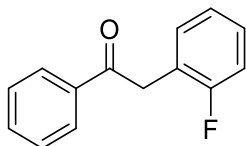

### 2-(2-Fluorophenyl)-1-phenylethan-1-one (3ak)

Yield: 19.7 mg, 46%; colorless oil;  $^1\text{H NMR}$  (400 MHz,  $\text{CDCl}_3$ )  $\delta$ : 8.05 (d,  $J = 7.8$  Hz, 2H), 7.59 (t,  $J = 7.4$  Hz, 1H), 7.49 (t,  $J = 7.6$  Hz, 2H), 7.32 – 7.20 (m, 2H), 7.16 – 7.03 (m, 2H), 4.34 (s, 2H);  $^{13}\text{C NMR}$  (100 MHz,  $\text{CDCl}_3$ )  $\delta$ : 196.3, 160.9 (d,  $J = 243.9$  Hz), 136.4, 133.3, 131.6 (d,  $J = 4.3$  Hz), 128.9 (d,  $J = 8.1$  Hz), 128.5 (d,  $J = 28.1$  Hz), 124.1, 124.1, 121.8 (d,  $J = 1.6$  Hz), 115.4 (d,  $J = 21.9$  Hz), 38.6.

These spectroscopic data correspond to reported data.<sup>[8]</sup>

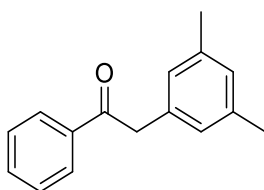

### 2-(3,5-Dimethylphenyl)-1-phenylethan-1-one (3al)

Yield: 34.5 mg, 77%; colorless oil;  $^1\text{H NMR}$  (400 MHz,  $\text{CDCl}_3$ )  $\delta$ : 8.02 (d,  $J = 7.5$  Hz, 2H), 7.55 (t,  $J = 7.4$  Hz, 1H), 7.45 (t,  $J = 7.6$  Hz, 2H), 6.88 (s, 3H), 4.20 (s, 2H), 2.28 (s, 7H);  $^{13}\text{C NMR}$  (100 MHz,  $\text{CDCl}_3$ )  $\delta$ : 197.9, 138.2, 136.6, 134.3, 133.1, 128.6, 128.6, 128.6, 127.2, 45.4, 21.2.

These spectroscopic data correspond to reported data.<sup>[2]</sup>

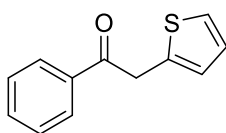

### 1-Phenyl-2-(thiophen-2-yl)ethan-1-one (3am)

Yield: 26.3 mg, 65%; colorless oil;  $^1\text{H NMR}$  (400 MHz,  $\text{CDCl}_3$ )  $\delta$ : 8.02 (d,  $J = 7.0$  Hz, 2H), 7.57 (t,  $J = 7.4$  Hz, 1H), 7.47 (t,  $J = 7.6$  Hz, 2H), 7.22 (dd,  $J = 5.1, 1.3$  Hz, 1H), 6.97 (dd,  $J = 5.1, 3.5$  Hz, 1H), 6.93 (dt,  $J = 3.6, 1.1$  Hz, 1H), 4.48 (s, 2H);  $^{13}\text{C NMR}$  (100 MHz,  $\text{CDCl}_3$ )  $\delta$ : 195.9, 136.0, 135.4, 133.4, 128.7, 128.5, 126.8, 126.8, 125.1, 39.3.

These spectroscopic data correspond to reported data.<sup>[11]</sup>

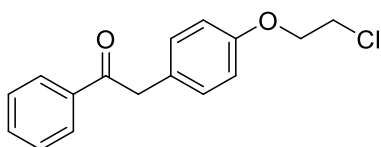

### 2-(4-(2-Chloroethoxy)phenyl)-1-phenylethan-1-one (3an)

Yield: 46.0 mg, 84%; colorless oil;  $^1\text{H NMR}$  (400 MHz,  $\text{CDCl}_3$ )  $\delta$ : 8.00 (d,  $J = 7.4$  Hz, 2H), 7.55 (t,  $J = 7.4$  Hz, 1H), 7.45 (t,  $J = 7.7$  Hz, 2H), 7.18 (d,  $J = 8.5$  Hz, 2H), 6.87 (d,  $J = 8.6$  Hz, 2H), 4.23 (s, 2H), 4.19 (t,  $J = 5.9$  Hz, 2H), 3.79 (t,  $J = 5.9$  Hz, 2H);  $^{13}\text{C NMR}$  (100 MHz,  $\text{CDCl}_3$ )  $\delta$ : 197.8, 157.1, 136.5, 133.1, 130.6, 128.6, 128.5, 127.2, 114.9, 68.0, 44.5, 41.9. HRMS (ESI)  $m/z$  calcd for  $\text{C}_{16}\text{H}_{15}\text{O}_2\text{ClNa}$  ( $\text{M}+\text{Na}$ ) $^+$  297.0653, found 297.0665.

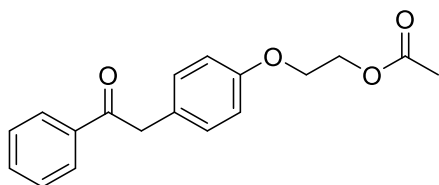

**2-(4-(2-Oxo-2-phenylethyl)phenoxy)ethyl acetate (3ao)**

Yield: 44.7 mg, 75%; colorless oil;  $^1\text{H NMR}$  (400 MHz,  $\text{CDCl}_3$ )  $\delta$ : 8.01 (d,  $J = 6.7$  Hz, 2H), 7.64 – 7.51 (m, 1H), 7.48 – 7.44 (m, 2H), 7.19 (d,  $J = 7.4$  Hz, 2H), 6.88 (d,  $J = 7.8$  Hz, 2H), 4.40 (s, 2H), 4.23 (s, 2H), 4.15 (s, 2H), 2.09 (s, 3H);  $^{13}\text{C NMR}$  (100 MHz,  $\text{CDCl}_3$ )  $\delta$ : 197.8, 171.0, 157.4, 136.5, 133.1, 130.5, 128.6, 128.5, 127.0, 114.8, 65.9, 62.81, 44.6, 20.9. HRMS (ESI)  $m/z$  calcd for  $\text{C}_{18}\text{H}_{18}\text{O}_4\text{Na}$  ( $\text{M}+\text{Na}$ ) $^+$  321.1097, found 321.1114.

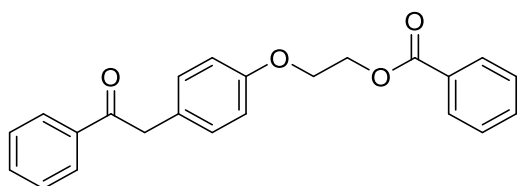

**2-(4-(2-Oxo-2-phenylethyl)phenoxy)ethyl benzoate (3ap)**

Yield: 53.3 mg, 74%; colorless oil;  $^1\text{H NMR}$  (400 MHz,  $\text{CDCl}_3$ )  $\delta$ : 8.05 (d,  $J = 7.0$  Hz, 2H), 8.01 (d,  $J = 6.9$  Hz, 2H), 7.58 – 7.54 (m, 2H), 7.48 – 7.41 (m, 4H), 7.19 (d,  $J = 7.5$  Hz, 2H), 6.91 (d,  $J = 7.5$  Hz, 2H), 4.65 (s, 2H), 4.28 (s, 2H), 4.23 (s, 2H);  $^{13}\text{C NMR}$  (100 MHz,  $\text{CDCl}_3$ )  $\delta$ : 197.8, 166.5, 157.5, 136.5, 133.1, 133.1, 130.5, 129.8, 129.7, 128.6, 128.5, 128.3, 127.0, 114.9, 66.0, 63.3, 44.6. HRMS (ESI)  $m/z$  calcd for  $\text{C}_{23}\text{H}_{20}\text{O}_4\text{Na}$  ( $\text{M}+\text{Na}$ ) $^+$  383.1254, found 383.1272.

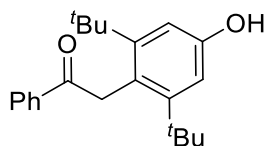

**2-(2,6-Di-tert-butyl-4-hydroxyphenyl)-1-phenylethan-1-one (3ar)**

Yield: 33.1 mg, 51%; colorless oil;  $^1\text{H NMR}$  (400 MHz,  $\text{CDCl}_3$ )  $\delta$ : 8.04 (d,  $J = 7.4$  Hz, 2H), 7.56 (t,  $J = 7.3$  Hz, 1H), 7.46 (t,  $J = 7.6$  Hz, 2H), 7.05 (s, 2H), 5.13 (s, 1H), 4.20 (s, 2H), 1.42 (s, 18H);  $^{13}\text{C NMR}$

(100 MHz, CDCl<sub>3</sub>)  $\delta$ : 198.3, 152.7, 136.9, 135.9, 133.0, 128.6, 128.5, 126.2, 124.9, 45.2, 34.3, 30.2.

HRMS (ESI)  $m/z$  calcd for C<sub>22</sub>H<sub>28</sub>O<sub>2</sub>Na (M+Na)<sup>+</sup> 347.1982, found 347.1991.

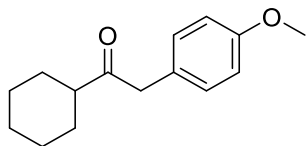

#### 1-Cyclohexyl-2-(4-methoxyphenyl)ethan-1-one (5aa)

Yield: 30.2 mg, 65%; colorless oil; <sup>1</sup>H NMR (400 MHz, CDCl<sub>3</sub>)  $\delta$ : <sup>1</sup>H NMR (400 MHz, Chloroform-*d*)  $\delta$  7.10 (d,  $J$  = 8.6 Hz, 2H), 6.86 (d,  $J$  = 8.6 Hz, 2H), 3.79 (s, 3H), 3.66 (s, 2H), 2.45 (tt,  $J$  = 11.6, 3.4 Hz, 1H), 1.87 – 1.70 (m, 4H), 1.69 – 1.64 (m, 1H), 1.41 – 1.17 (m, 5H); <sup>13</sup>C NMR (100 MHz, CDCl<sub>3</sub>)  $\delta$ : 211.7, 158.4, 130.4, 126.4, 114.0, 55.2, 49.9, 47.0, 28.5, 25.8, 25.6. HRMS (ESI)  $m/z$  calcd for C<sub>15</sub>H<sub>20</sub>O<sub>2</sub>Na (M+Na)<sup>+</sup> 255.1356, found 255.1451.

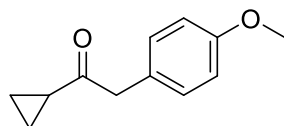

#### 1-Cyclopropyl-2-(4-methoxyphenyl)ethan-1-one (5ba)

Yield: 25.1 mg, 66%; colorless oil; <sup>1</sup>H NMR (400 MHz, CDCl<sub>3</sub>)  $\delta$ : 7.14 (d,  $J$  = 8.6 Hz, 2H), 6.87 (d,  $J$  = 8.6 Hz, 2H), 3.79 (s, 3H), 3.76 (s, 2H), 1.96 (tt,  $J$  = 7.8, 4.5 Hz, 1H), 1.07 – 0.98 (m, 2H), 0.86 – 0.86 (m, 2H); <sup>13</sup>C NMR (100 MHz, CDCl<sub>3</sub>)  $\delta$ : 208.8, 158.5, 130.5, 126.4, 114.0, 55.2, 49.8, 19.9, 11.3. HRMS (ESI)  $m/z$  calcd for C<sub>12</sub>H<sub>14</sub>O<sub>2</sub>Na (M+Na)<sup>+</sup> 213.0886, found 213.0894.

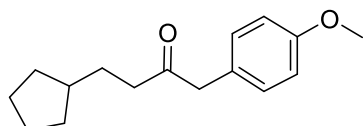

#### 4-Cyclopentyl-1-(4-methoxyphenyl)butan-2-one (5ca)

Yield: 22.6 mg, 46%; colorless oil; <sup>1</sup>H NMR (400 MHz, CDCl<sub>3</sub>)  $\delta$ : 7.12 (d,  $J$  = 8.6 Hz, 2H), 6.86 (d,  $J$  = 8.6 Hz, 2H), 3.80 (s, 3H), 3.62 (s, 2H), 2.44 (t,  $J$  = 7.2 Hz, 2H), 1.75 – 1.64 (m, 3H), 1.58 – 1.52 (m, 4H), 1.50 – 1.45 (m, 2H), 1.09 – 0.96 (m, 2H); <sup>13</sup>C NMR (100 MHz, CDCl<sub>3</sub>)  $\delta$ : 209.2, 158.5, 130.4, 126.4, 114.1, 55.2, 49.2, 41.1, 39.6, 32.4, 29.9, 25.1. HRMS (ESI)  $m/z$  calcd for C<sub>16</sub>H<sub>22</sub>O<sub>2</sub>Na (M+Na)<sup>+</sup> 269.1512, found 269.1523.

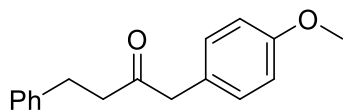

#### 1-(4-Methoxyphenyl)-4-phenylbutan-2-one (5da)

Yield: 40.2 mg, 79%; colorless oil;  $^1\text{H}$  NMR (400 MHz,  $\text{CDCl}_3$ )  $\delta$ : 7.25 (t,  $J = 7.1$  Hz, 2H), 7.17 (t,  $J = 7.3$  Hz, 1H), 7.12 (d,  $J = 6.7$  Hz, 2H), 7.06 (d,  $J = 8.6$  Hz, 2H), 6.84 (d,  $J = 8.6$  Hz, 2H), 3.77 (s, 3H), 3.58 (s, 2H), 2.85 (t,  $J = 7.1$  Hz, 2H), 2.79 – 2.70 (t,  $J = 7.1$  Hz, 2H);  $^{13}\text{C}$  NMR (100 MHz,  $\text{CDCl}_3$ )  $\delta$ : 207.8, 158.5, 140.9, 130.3, 128.4, 128.2, 126.0, 126.0, 114.1, 55.2, 49.4, 43.2, 29.7. HRMS (ESI)  $m/z$  calcd for  $\text{C}_{17}\text{H}_{18}\text{O}_2\text{Na}$  ( $\text{M}+\text{Na}$ ) $^+$  277.1199, found 277.1209.

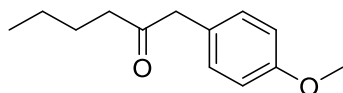

#### 1-(4-Methoxyphenyl)hexan-2-one (5ea)

Yield: 21.0 mg, 51%; colorless oil;  $^1\text{H}$  NMR (400 MHz,  $\text{CDCl}_3$ )  $\delta$ : 7.11 (d,  $J = 8.6$  Hz, 2H), 6.86 (d,  $J = 8.6$  Hz, 2H), 3.79 (s, 3H), 3.61 (s, 2H), 2.43 (t,  $J = 7.4$  Hz, 2H), 1.52 (p,  $J = 7.5$  Hz, 2H), 1.25 (p,  $J = 7.4$  Hz, 2H), 0.86 (t,  $J = 7.3$  Hz, 3H);  $^{13}\text{C}$  NMR (100 MHz,  $\text{CDCl}_3$ )  $\delta$ : 209.1, 158.5, 130.3, 126.4, 114.1, 55.2, 49.2, 41.5, 25.8, 22.2, 13.8. HRMS (ESI)  $m/z$  calcd for  $\text{C}_{13}\text{H}_{18}\text{O}_2\text{Na}$  ( $\text{M}+\text{Na}$ ) $^+$  229.1199, found 229.1208.

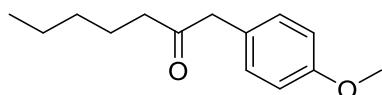

#### 1-(4-Methoxyphenyl)heptan-2-one (5fa)

Yield: 23.3 mg, 53%; colorless oil;  $^1\text{H}$  NMR (400 MHz,  $\text{CDCl}_3$ )  $\delta$ : 7.11 (d,  $J = 8.5$  Hz, 2H), 6.86 (d,  $J = 8.6$  Hz, 2H), 3.79 (s, 3H), 3.61 (s, 2H), 2.42 (t,  $J = 7.4$  Hz, 2H), 1.54 (p,  $J = 7.5$  Hz, 2H), 1.30 – 1.19 (m, 4H), 0.86 (t,  $J = 7.0$  Hz, 3H);  $^{13}\text{C}$  NMR (100 MHz,  $\text{CDCl}_3$ )  $\delta$ : 209.1, 158.5, 130.3, 126.4, 114.1, 55.2, 49.2, 41.8, 31.3, 23.4, 22.4, 13.9. HRMS (ESI)  $m/z$  calcd for  $\text{C}_{14}\text{H}_{20}\text{O}_2\text{Na}$  ( $\text{M}+\text{Na}$ ) $^+$  243.1356, found 243.1363.

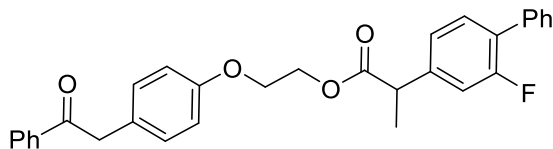

#### 2-(4-(2-Oxo-2-phenylethyl)phenoxy)ethyl 2-(2-fluoro-[1,1'-biphenyl]-4-yl)propanoate (7aa)

Yield: 58.8 mg, 61%; colorless oil;  $^1\text{H}$  NMR (400 MHz,  $\text{CDCl}_3$ )  $\delta$ : 7.99 (d,  $J = 7.3$  Hz, 2H), 7.55 (d,  $J = 7.6$  Hz, 1H), 7.51 (d,  $J = 8.2$  Hz, 2H), 7.44 (q,  $J = 7.7$  Hz, 4H), 7.35 (d,  $J = 7.3$  Hz, 2H), 7.20 – 7.09 (m, 4H), 6.83 (d,  $J = 8.6$  Hz, 2H), 4.48 – 4.38 (m, 2H), 4.20 (s, 2H), 4.12 (t,  $J = 4.7$  Hz, 2H), 3.79 (q,  $J = 7.1$  Hz, 1H), 1.53 (d,  $J = 7.2$  Hz, 3H);  $^{13}\text{C}$  NMR (100 MHz,  $\text{CDCl}_3$ )  $\delta$ : 197.8, 173.9, 159.6 (d,  $J = 246.8$  Hz), 157.4, 141.5 (d,  $J = 7.7$  Hz), 136.5, 135.4, 133.1, 130.7 (d,  $J = 3.9$  Hz), 130.5, 128.9 (d,  $J = 2.9$  Hz),

128.6, 128.5, 128.4, 127.8 (d,  $J = 13.5$  Hz), 127.6, 127.0, 123.5 (d,  $J = 3.4$  Hz), 115.2 (d,  $J = 23.5$  Hz), 114.8, 65.8, 63.3, 44.8, 44.5, 18.3. HRMS (ESI)  $m/z$  calcd for  $C_{31}H_{27}O_4FNa$  ( $M+Na$ )<sup>+</sup> 505.1786, found 505.1799.

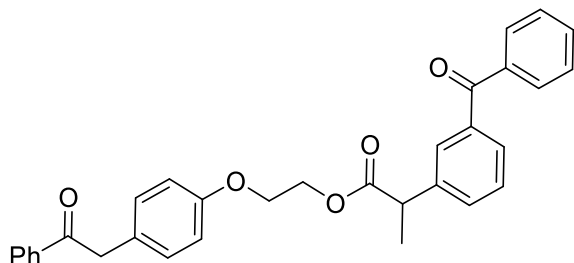

**2-(4-(2-Oxo-2-phenylethyl)phenoxy)ethyl 2-(3-benzoylphenyl)propanoate (7ab)**

Yield: 54.1 mg, 55%; colorless oil; <sup>1</sup>H NMR (400 MHz, CDCl<sub>3</sub>)  $\delta$ : 8.00 (d,  $J = 7.0$  Hz, 2H), 7.77 (t,  $J = 7.8$  Hz, 3H), 7.65 (d,  $J = 7.7$  Hz, 1H), 7.60 – 7.53 (m, 3H), 7.48 – 7.43 (m, 4H), 7.39 (t,  $J = 7.7$  Hz, 1H), 7.15 (d,  $J = 8.5$  Hz, 2H), 6.80 (d,  $J = 8.6$  Hz, 2H), 4.49 – 4.35 (m, 2H), 4.21 (s, 2H), 4.10 (d,  $J = 4.8$  Hz, 2H), 3.83 (q,  $J = 7.2$  Hz, 1H), 1.53 (d,  $J = 7.2$  Hz, 3H); <sup>13</sup>C NMR (100 MHz, CDCl<sub>3</sub>)  $\delta$ : 197.8, 196.4, 174.0, 157.3, 140.5, 137.8, 137.4, 136.4, 133.1, 132.5, 131.5, 130.5, 130.0, 129.2, 129.0, 128.6, 128.5, 128.5, 128.2, 127.0, 114.8, 65.7, 63.2, 45.2, 44.5, 18.4. HRMS (ESI)  $m/z$  calcd for  $C_{32}H_{28}O_5Na$  ( $M+Na$ )<sup>+</sup> 515.1829, found 515.1836.

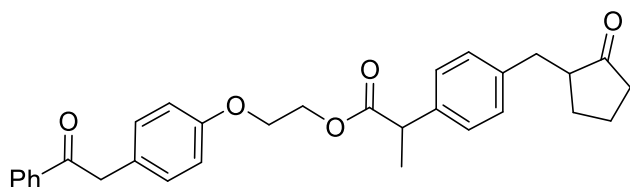

**2-(4-(2-Oxo-2-phenylethyl)phenoxy)ethyl 2-(4-((2-oxocyclopentyl)methyl)phenyl)propanoate (7ac)**

Yield: 60.0 mg, 62%; colorless oil; <sup>1</sup>H NMR (400 MHz, CDCl<sub>3</sub>)  $\delta$ : 8.01 (d,  $J = 7.0$  Hz, 2H), 7.56 (t,  $J = 7.3$  Hz, 1H), 7.46 (t,  $J = 7.7$  Hz, 2H), 7.21 (d,  $J = 8.1$  Hz, 2H), 7.17 (d,  $J = 8.6$  Hz, 2H), 7.09 (d,  $J = 8.1$  Hz, 2H), 6.83 (d,  $J = 8.6$  Hz, 2H), 4.46 – 4.41 (m, 1H), 4.39 – 4.33 (m, 1H), 4.23 (s, 2H), 4.10 (t,  $J = 4.8$  Hz, 2H), 3.73 (q,  $J = 7.1$  Hz, 1H), 3.11 (dd,  $J = 13.9, 4.0$  Hz, 1H), 2.47 (dd,  $J = 13.9, 9.7$  Hz, 1H), 2.39 – 2.26 (m, 2H), 2.16 – 2.00 (m, 2H), 1.98 – 1.91 (m, 1H), 1.78 – 1.64 (m, 2H), 1.58 – 1.50 (m, 1H), 1.48 (d,  $J = 7.2$  Hz, 3H); <sup>13</sup>C NMR (100 MHz, CDCl<sub>3</sub>)  $\delta$ : 220.2, 197.8, 174.5, 157.4, 138.8, 138.1, 136.5, 133.1, 130.5, 129.0, 128.6, 128.5, 127.5, 127.0, 114.8, 65.8, 63.0, 50.9, 44.9, 44.5, 38.1, 35.1, 29.2, 20.5, 18.5. HRMS (ESI)  $m/z$  calcd for  $C_{31}H_{32}O_5Na$  ( $M+Na$ )<sup>+</sup> 507.2142, found 507.2149.

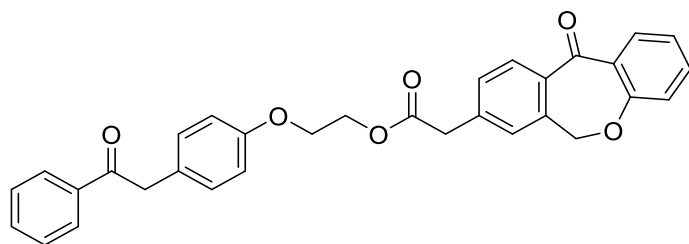

**2-(4-(2-Oxo-2-phenylethyl)phenoxy)ethyl 2-(11-oxo-6,11-dihydrodibenzo[b,e]oxepin-8-yl)acetate (7ad)**

Yield: 67.8 mg, 67%; colorless oil;  $^1\text{H NMR}$  (400 MHz,  $\text{CDCl}_3$ )  $\delta$ : 8.11 (d,  $J = 2.4$  Hz, 1H), 8.06 – 7.95 (m, 2H), 7.92 – 7.84 (m, 1H), 7.59 – 7.52 (m, 2H), 7.51 – 7.39 (m, 4H), 7.36 (d,  $J = 7.4$  Hz, 1H), 7.17 (d,  $J = 8.5$  Hz, 2H), 7.01 (d,  $J = 8.4$  Hz, 1H), 6.86 (d,  $J = 8.6$  Hz, 2H), 5.17 (s, 2H), 4.45 (t,  $J = 4.7$  Hz, 2H), 4.22 (s, 2H), 4.15 (t,  $J = 4.7$  Hz, 2H), 3.68 (s, 2H);  $^{13}\text{C NMR}$  (100 MHz,  $\text{CDCl}_3$ )  $\delta$ : 197.8, 190.8, 171.4, 160.5, 157.4, 140.4, 136.5, 136.3, 135.5, 133.1, 132.7, 132.5, 130.5, 129.5, 129.2, 128.6, 128.6, 127.8, 127.5, 127.0, 125.1, 121.1, 114.8, 73.6, 65.8, 63.3, 44.6, 40.0. HRMS (ESI)  $m/z$  calcd for  $\text{C}_{32}\text{H}_{26}\text{O}_6\text{Na}$  ( $\text{M}+\text{Na}$ ) $^+$  529.1622, found 529.1629.

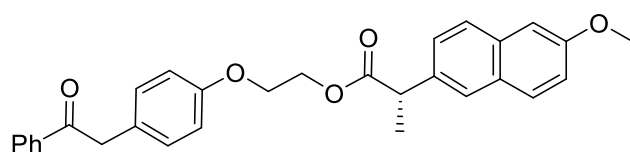

**2-(4-(2-Oxo-2-phenylethyl)phenoxy)ethyl (S)-2-(6-methoxynaphthalen-2-yl)propanoate (7ae)**

Yield: 67.4 mg, 72%; colorless oil;  $^1\text{H NMR}$  (400 MHz,  $\text{CDCl}_3$ )  $\delta$ : 8.01 (d,  $J = 7.2$  Hz, 2H), 7.69 – 7.63 (m, 3H), 7.56 (t,  $J = 7.4$  Hz, 1H), 7.46 (t,  $J = 7.6$  Hz, 2H), 7.39 (d,  $J = 8.6$  Hz, 1H), 7.16 – 7.07 (m, 4H), 6.78 (d,  $J = 8.5$  Hz, 2H), 4.44 (dt,  $J = 12.1, 4.8$  Hz, 1H), 4.36 (dt,  $J = 12.1, 4.6$  Hz, 1H), 4.21 (s, 2H), 4.09 (t,  $J = 4.8$  Hz, 2H), 3.90 (s, 3H), 3.90 – 3.85 (m, 1H), 1.57 (d,  $J = 7.1$  Hz, 3H);  $^{13}\text{C NMR}$  (100 MHz,  $\text{CDCl}_3$ )  $\delta$ : 197.8, 174.6, 157.6, 157.4, 136.5, 135.4, 133.7, 133.1, 130.5, 129.3, 128.9, 128.6, 128.5, 127.1, 127.0, 126.2, 125.9, 118.9, 114.9, 105.5, 65.9, 63.1, 55.3, 45.3, 44.6, 18.5. HRMS (ESI)  $m/z$  calcd for  $\text{C}_{30}\text{H}_{28}\text{O}_5\text{Na}$  ( $\text{M}+\text{Na}$ ) $^+$  491.1829, found 491.1836.

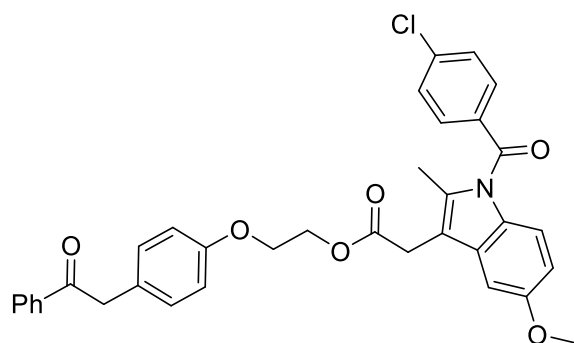



**2-(4-(2-Oxo-2-phenylethyl)phenoxy)ethyl 2-(1-(4-chlorobenzoyl)-5-methoxy-2-methyl-1H-indol-3-yl)acetate (7af)**

Yield: 39.3 mg, 33%; colorless oil;  $^1\text{H NMR}$  (400 MHz,  $\text{CDCl}_3$ )  $\delta$ : 7.94 (d,  $J = 6.9$  Hz, 2H), 7.65 (d,  $J = 8.5$  Hz, 2H), 7.54 (t,  $J = 7.4$  Hz, 1H), 7.41 (dt,  $J = 7.6, 3.4$  Hz, 4H), 7.04 (dd,  $J = 5.6, 2.9$  Hz, 3H), 6.70 (d,  $J = 8.5$  Hz, 2H), 6.61 (dd,  $J = 9.1, 2.5$  Hz, 1H), 6.40 (d,  $J = 9.0$  Hz, 1H), 4.83 (s, 2H), 4.43 – 4.34 (m, 2H), 4.09 – 4.02 (m, 2H), 3.78 (s, 3H), 3.74 (s, 2H), 2.27 (s, 3H);  $^{13}\text{C NMR}$  (100 MHz,  $\text{CDCl}_3$ )  $\delta$ : 195.4, 170.4, 168.7, 156.2, 155.9, 139.1, 136.4, 133.4, 133.3, 133.3, 131.3, 130.9, 130.4, 130.3, 129.9, 129.1, 128.6, 128.2, 115.0, 114.5, 114.4, 112.3, 101.3, 65.8, 63.5, 55.6, 36.5, 30.3, 20.5. HRMS (ESI)  $m/z$  calcd for  $\text{C}_{35}\text{H}_{30}\text{O}_6\text{NCINa}$  ( $\text{M}+\text{Na}$ ) $^+$  618.1654, found 618.1662.

## 5. Reference

- [1] E. D. Nacsa, D. W. C. MacMillan, *J. Am. Chem. Soc.* **2018**, *140*, 3322.
- [2] P. E. Krach, A. Dewanji, T. Yuana, M. Rueping, *Chem. Commun.* **2020**, *56*, 6082.
- [3] X. Chen, Z. Chen, C. M. So, *J. Org. Chem.* **2019**, *84*, 6337.
- [4] A. D. Benischke, M. Leroux, I. Knoll, P. Knochel, *Org. Lett.* **2016**, *18*, 3626.
- [5] L.-Z. Yuan, D. Renko, I. Khelifi, O. Provot, J.-D. Brion, A. Hamze, M. Alami, *Org. Lett.* **2016**, *18*, 3238.
- [6] H. Shi, C. Du, X. Zhang, F. Xie, X. Wang, S. Cui, X. Peng, M. Cheng, B. Lin, Y. Liu *J. Org. Chem.* **2018**, *83*, 1312.
- [7] C. Xu, H.-M. Li, Z.-Q. Wang, W.-J. Fu, Y.-Q. Zhang, B.-M. Ji, *Australian J. Org. Chem.* **2012**, *65*, 366.
- [8] K. Huang, G. Li, W.-P. Huang, D.-G. Yu, Z.-J. Shi, *Chem. Commun.* **2011**, *47*, 7224.
- [9] S. Xie, Z.-J. He, L.-H. Zhang, B.-L. Huang, X.-W. Chen, Z.-S. Zhan, F.-M. Zhang, *Chem. Commun.* **2021**, *57*, 2069.
- [10] N. Marion, E. C. Ecarnot, O. Navarro, D. Amoroso, A. Bell, S. P. Nolan, *J. Org. Chem.* **2006**, *71*, 3816.
- [11] H. Mo, D. Chen, L. Xu, D. Chen, F. Pan, J. Yang, *Synthesis*, **2015**, *47*, 209.

## 6. Spectra

### 2-(4-Methoxyphenyl)-1-phenylethan-1-one (3aa)

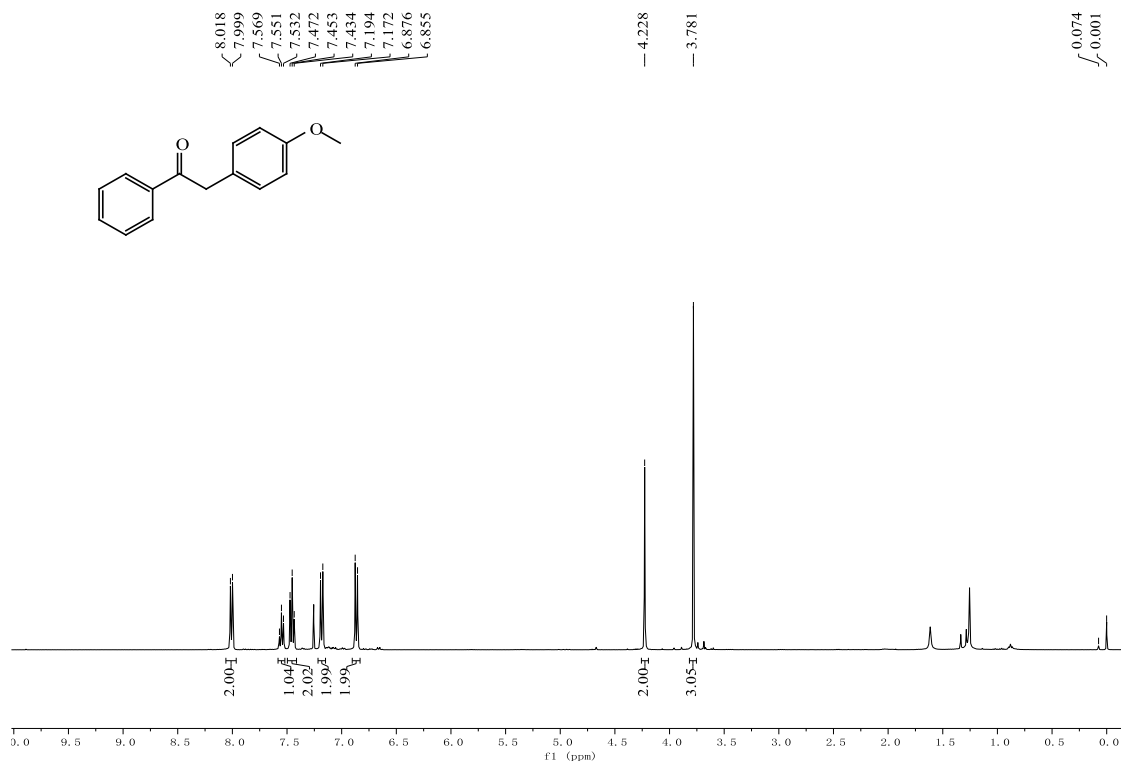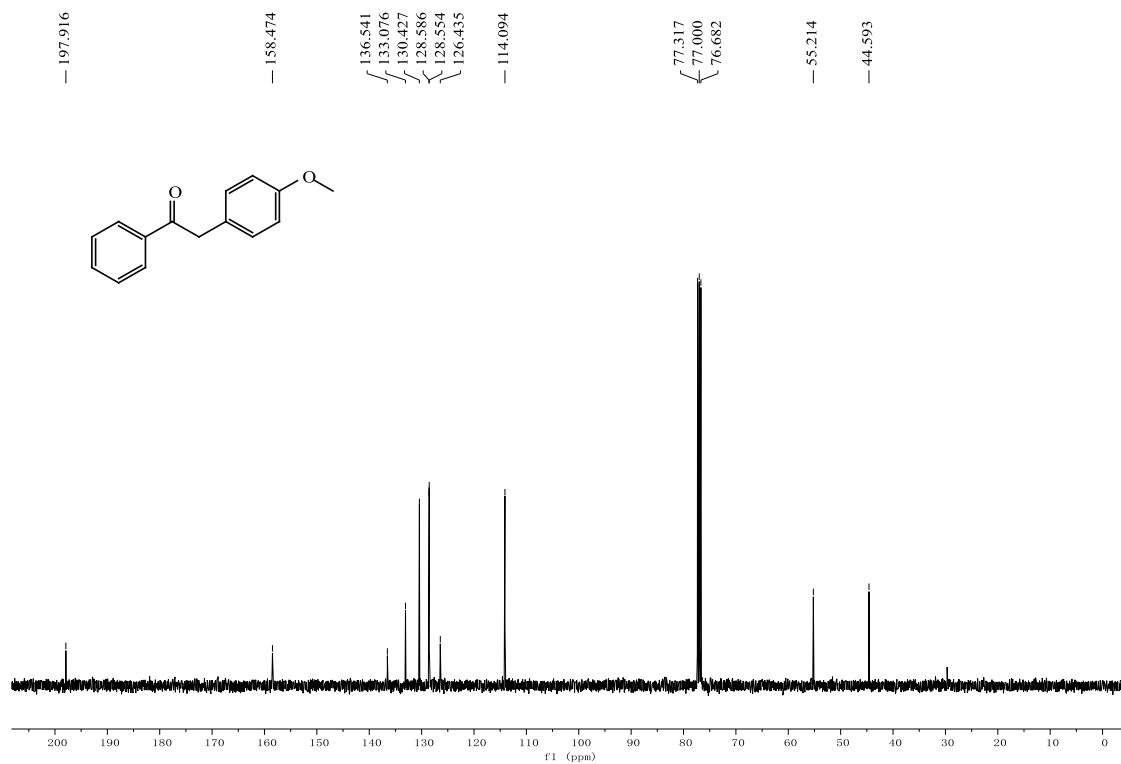

**2-(4-Methoxyphenyl)-1-(*p*-tolyl)ethan-1-one (3ba)**

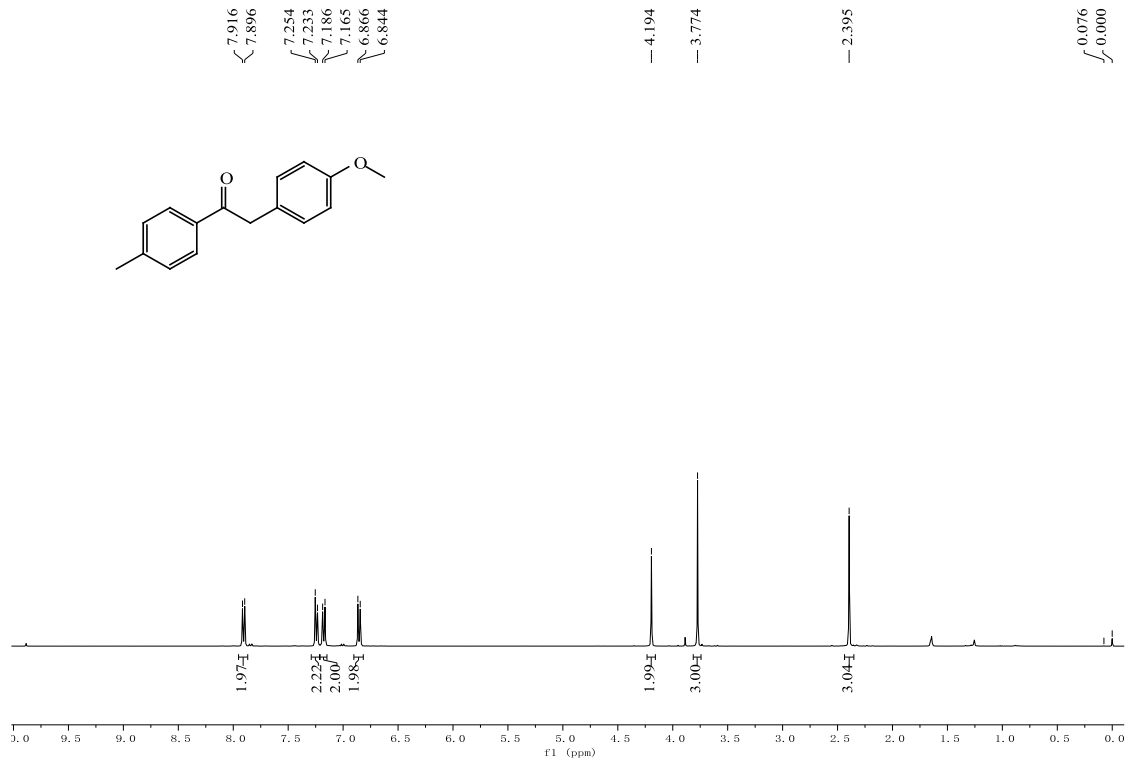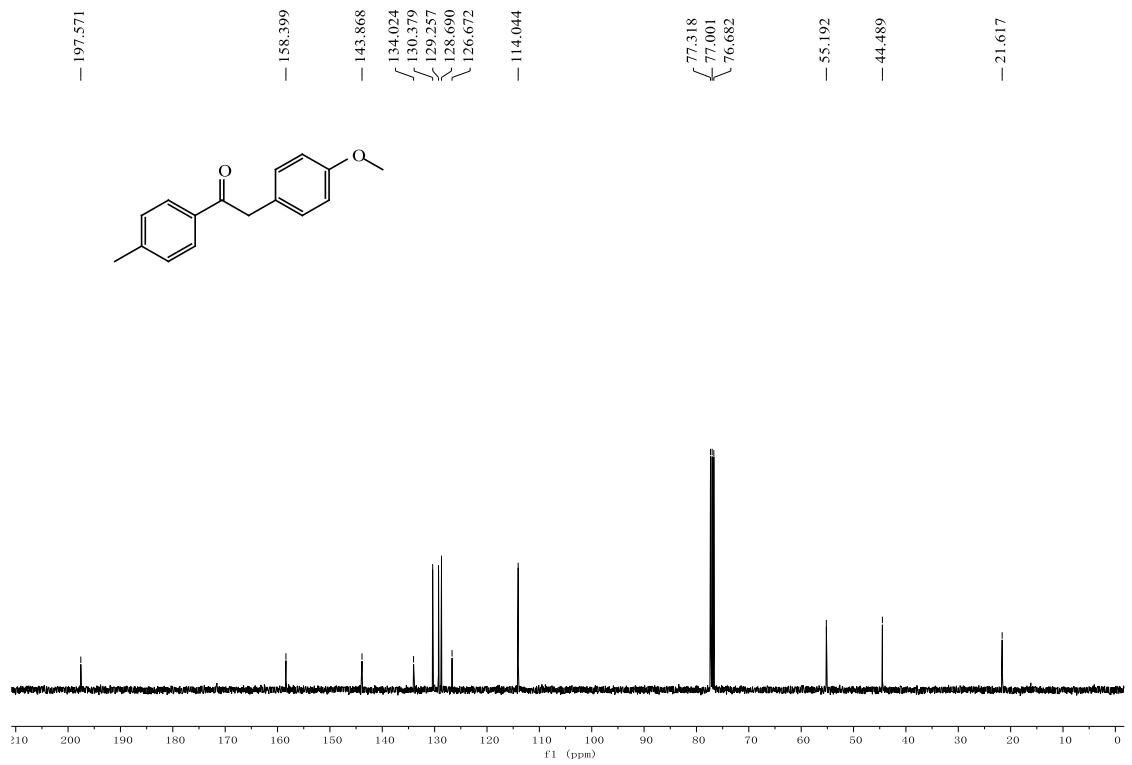

### 1,2-Bis(4-methoxyphenyl)ethan-1-one (3ca)

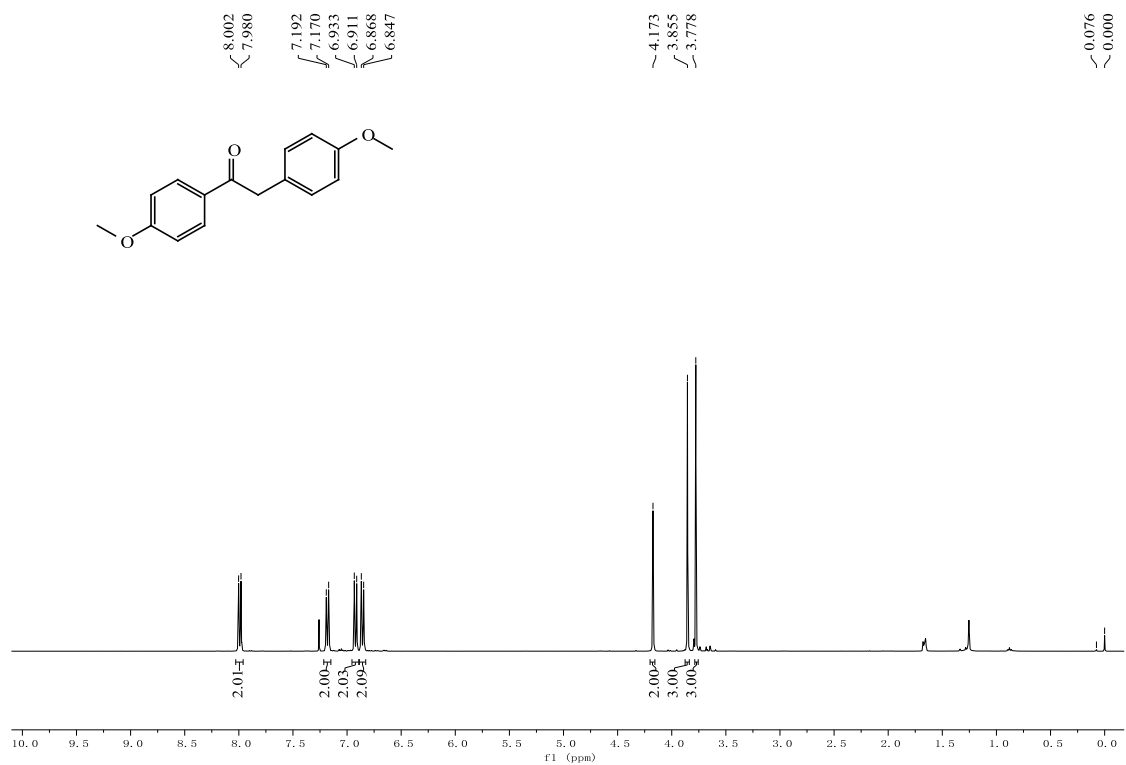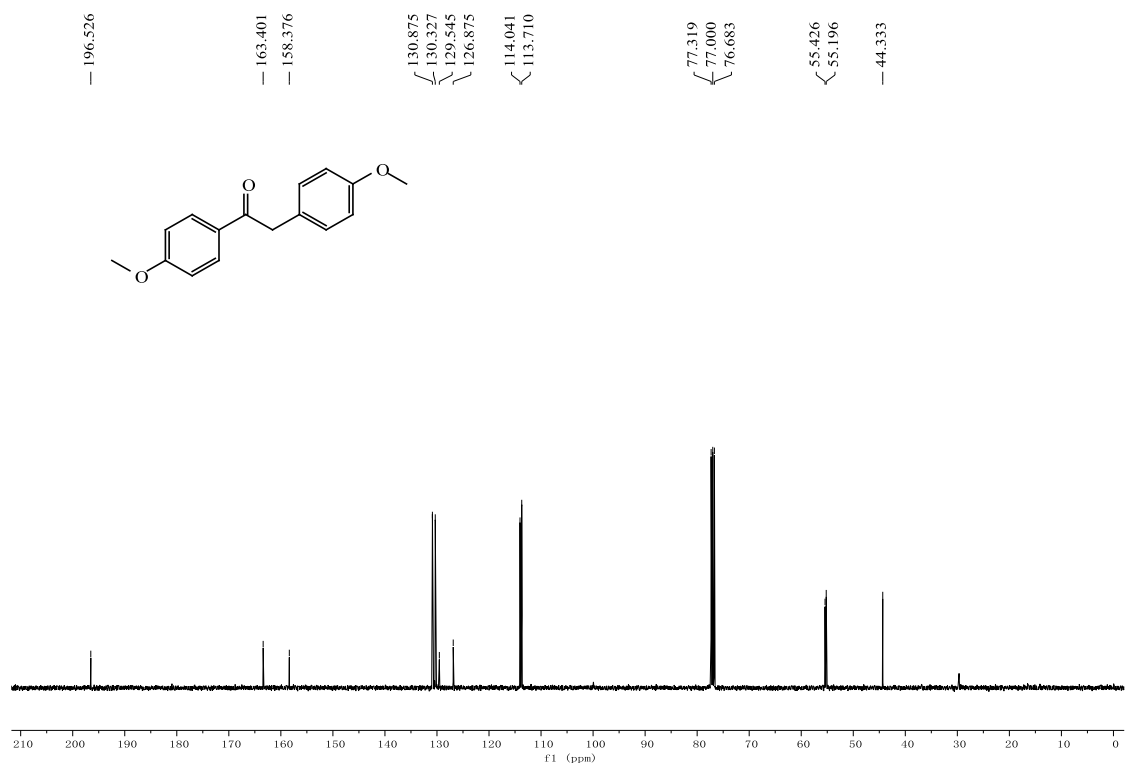

**1-(4-(*tert*-Butyl)phenyl)-2-(4-methoxyphenyl)ethan-1-one (3da)**

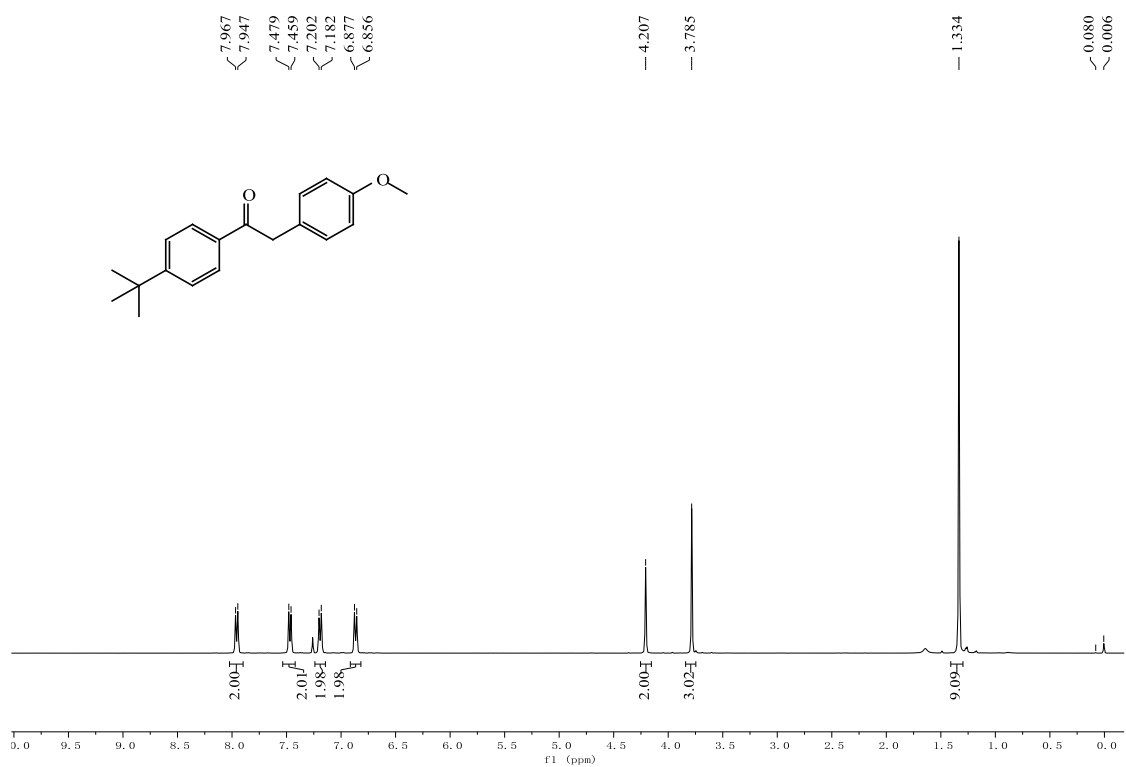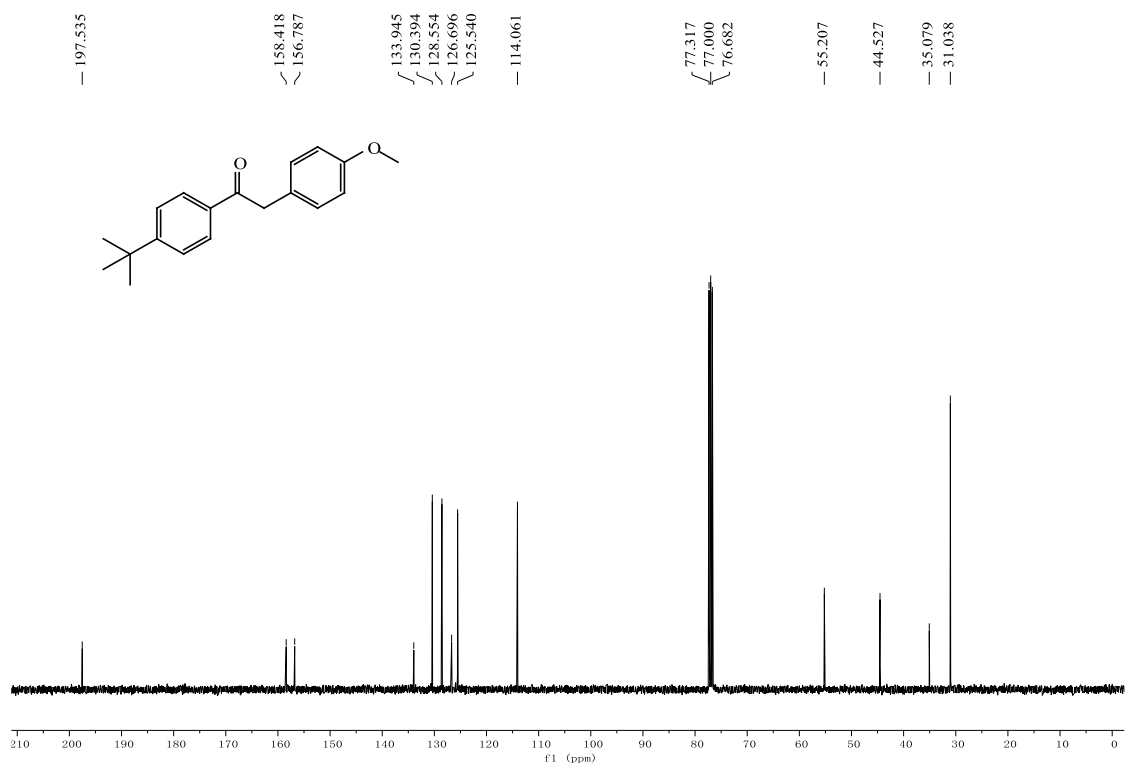

**1-([1,1'-Biphenyl]-4-yl)-2-(4-methoxyphenyl)ethan-1-one (3ea)**

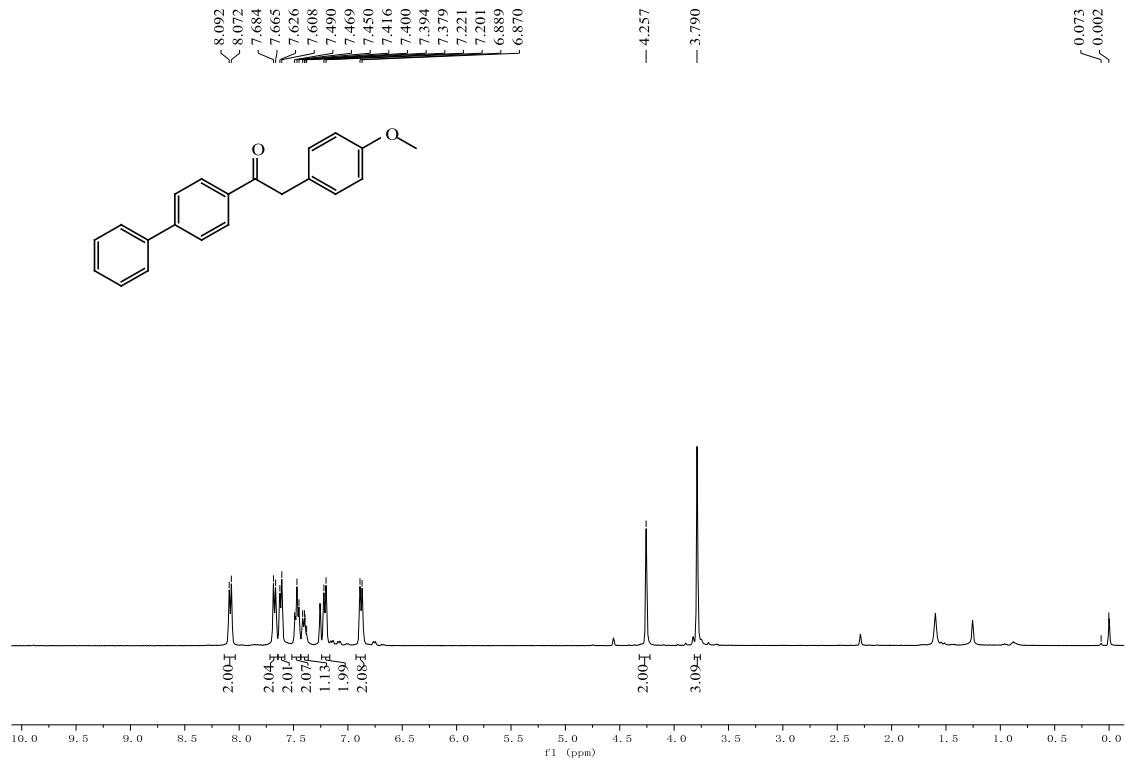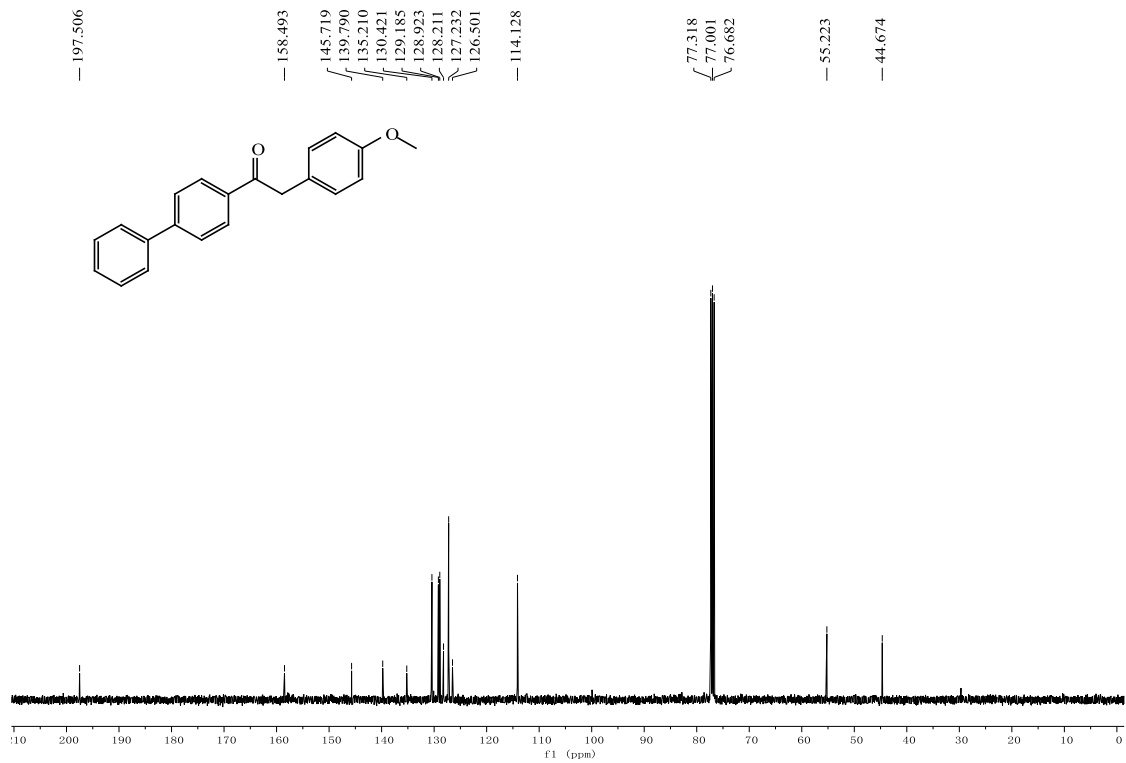

### 1-(4-Fluorophenyl)-2-(4-methoxyphenyl)ethan-1-one (3fa)

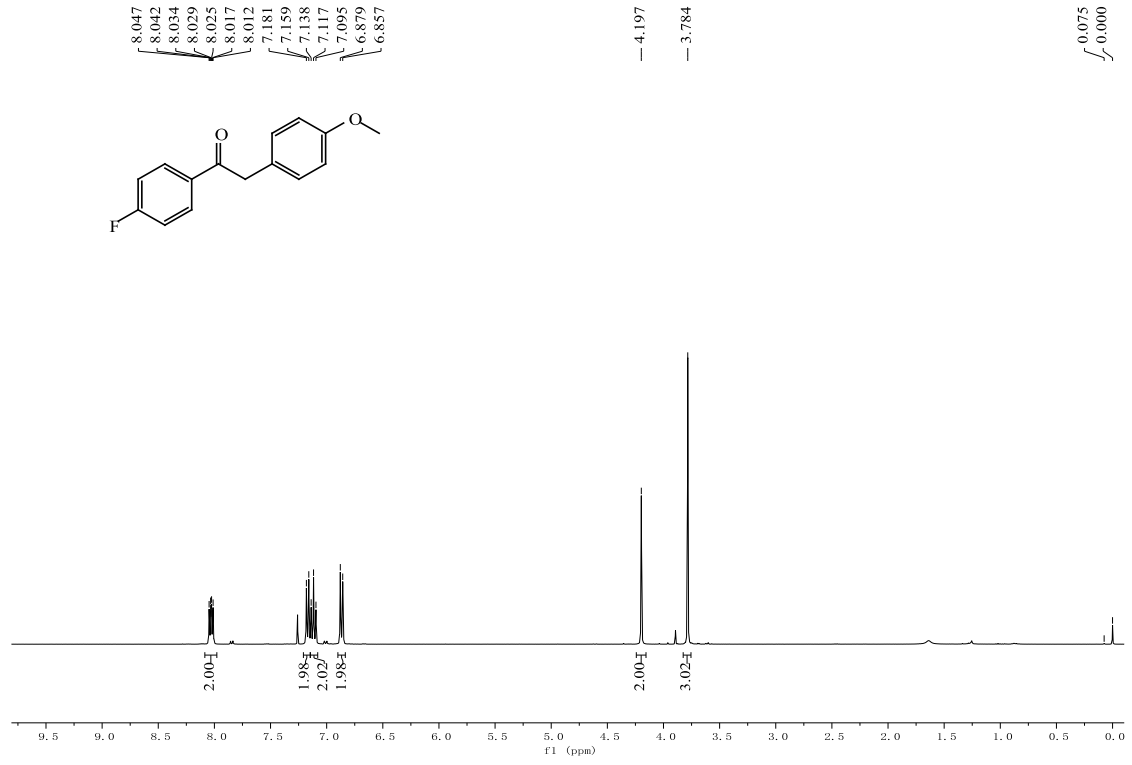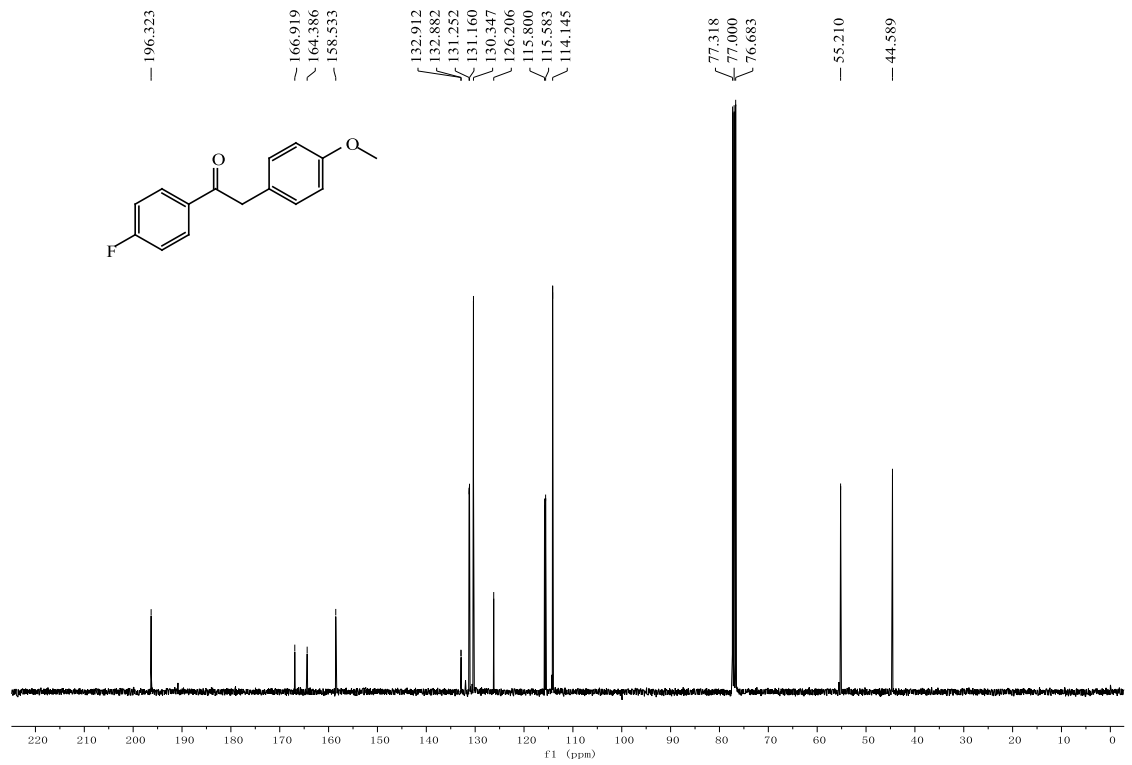



1-(4-Chlorophenyl)-2-(4-methoxyphenyl)ethan-1-one (3ga)

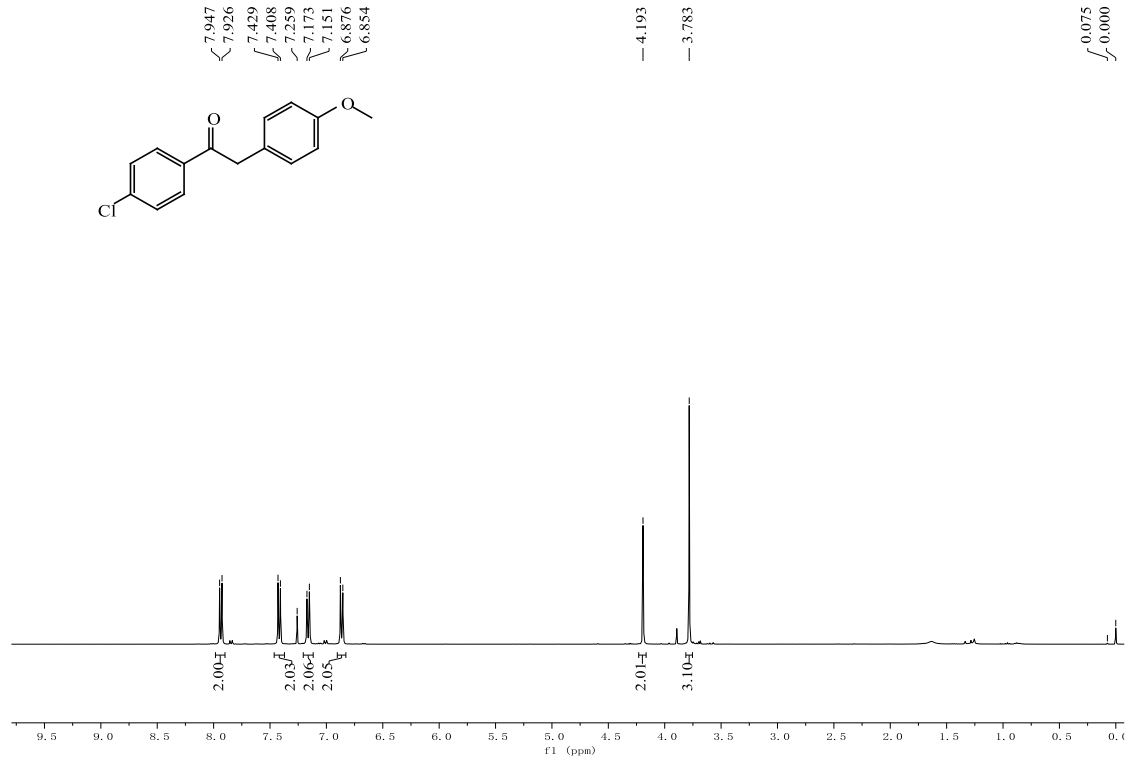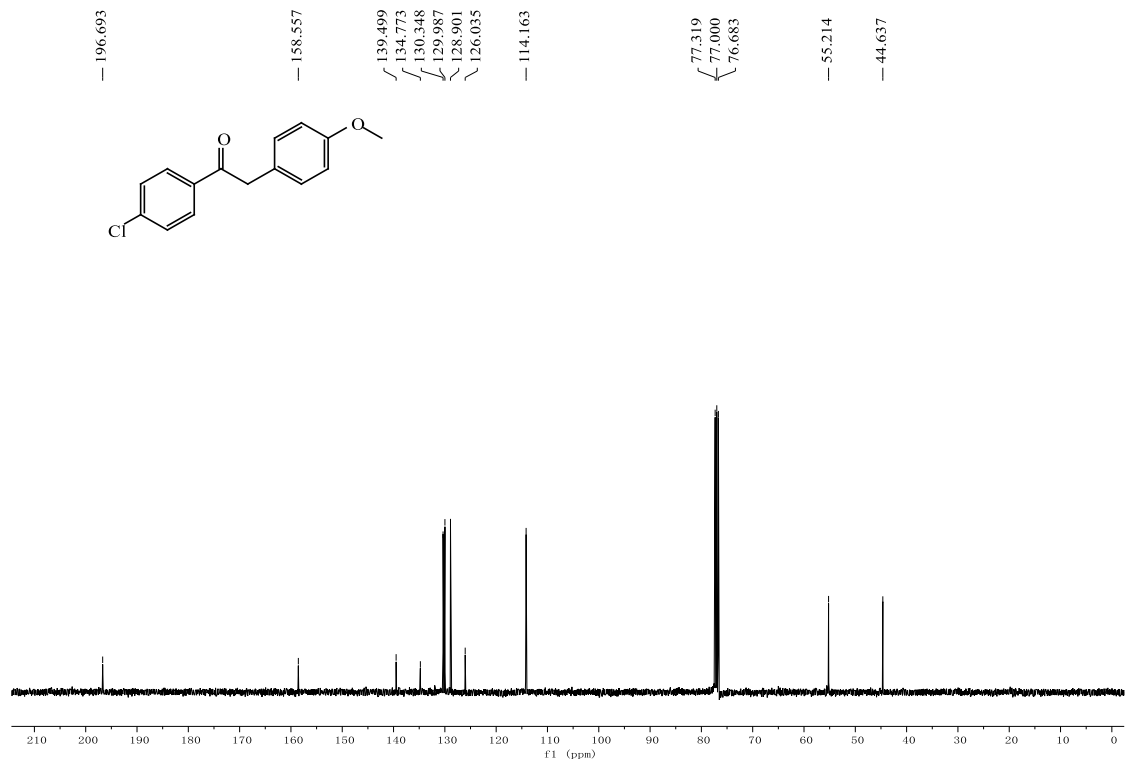

### 1-(4-Bromophenyl)-2-(4-methoxyphenyl)ethan-1-one (3ha)

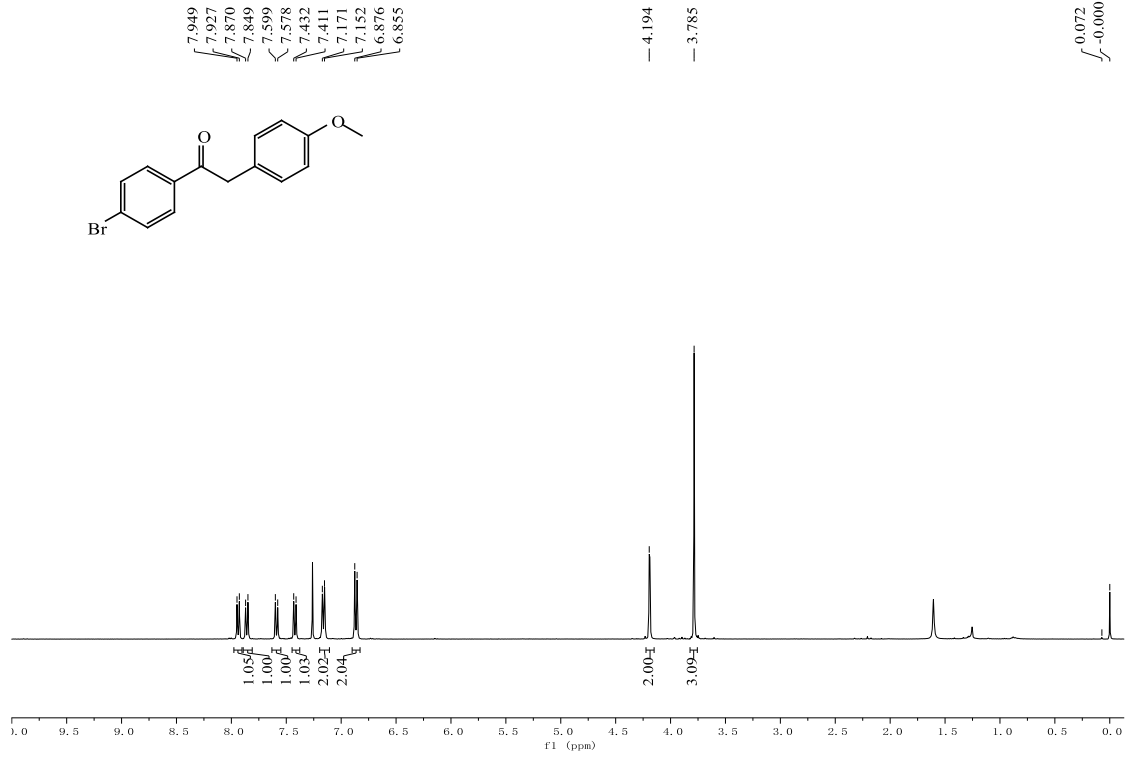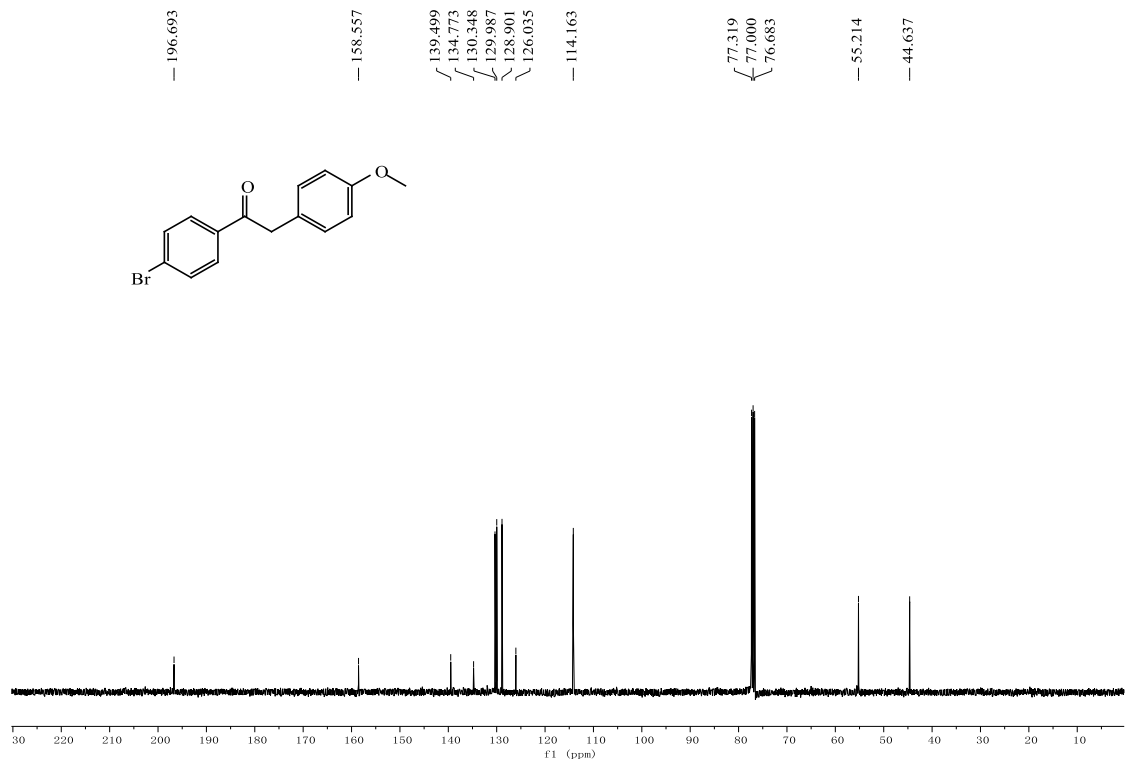

2-(4-Methoxyphenyl)-1-(4-(trifluoromethyl)phenyl)ethan-1-one (3ia)

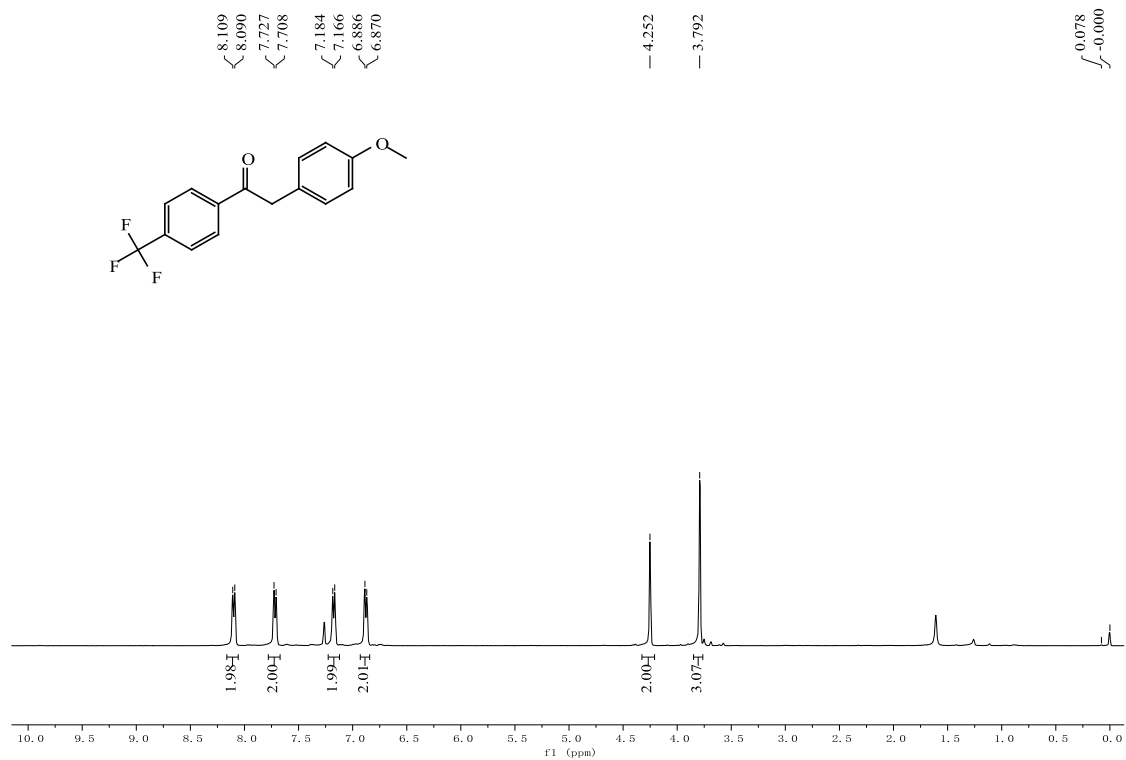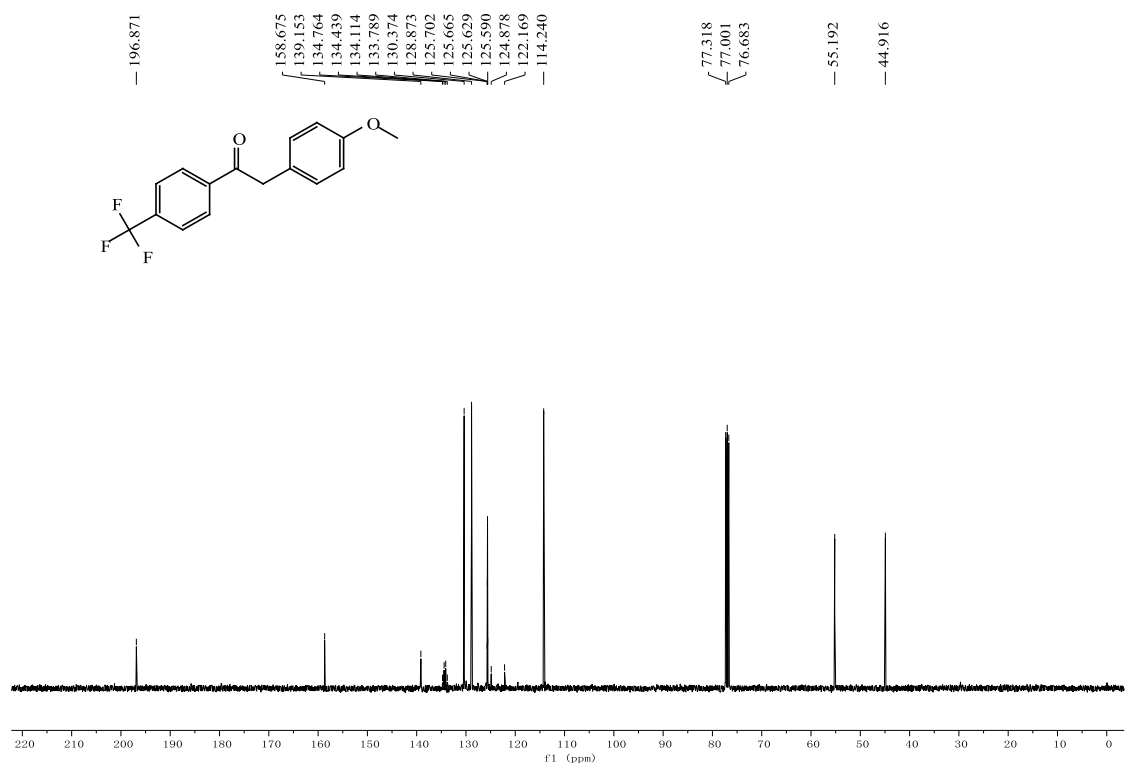

**2-(4-Methoxyphenyl)-1-(*m*-tolyl)ethan-1-one (3ja)**

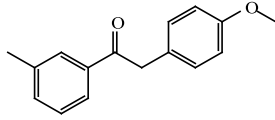

7.814  
7.793  
7.374  
7.353  
7.333  
7.314  
7.186  
7.166  
6.872  
6.852

4.211

3.780

2.400

0.077  
0.000

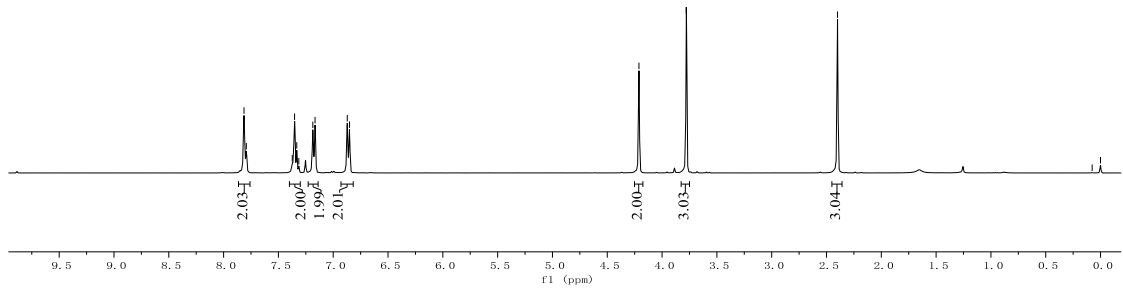

198.127

158.424

138.380  
136.580  
133.843  
130.423  
129.016  
128.426  
126.541  
125.795  
114.052

77.318  
77.000  
76.682

55.194

44.581

21.353

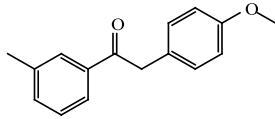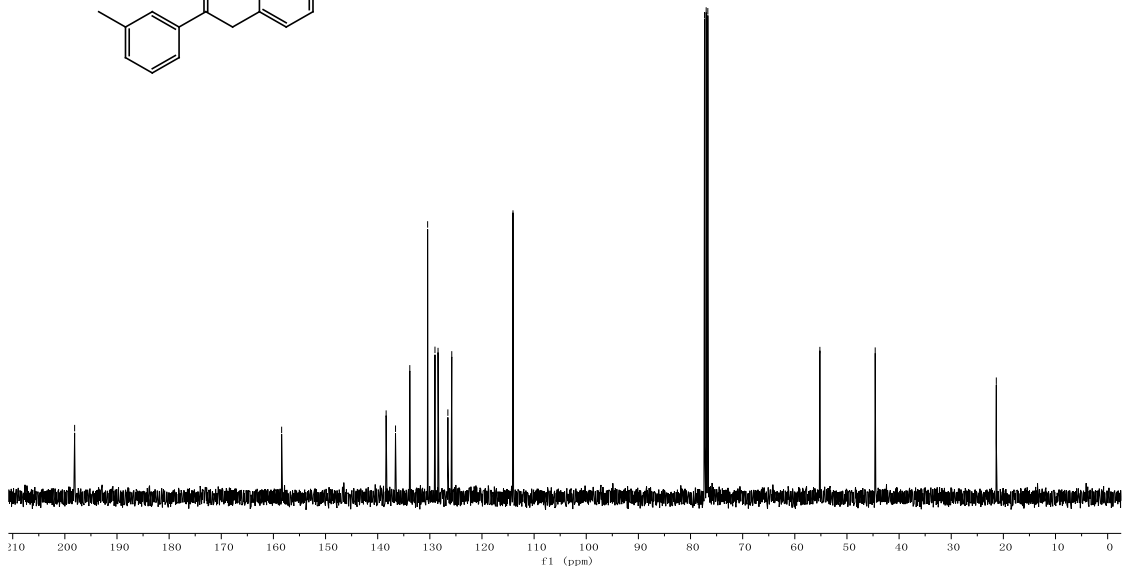

1-(3-Methoxyphenyl)-2-(4-methoxyphenyl)ethan-1-one (3ka)

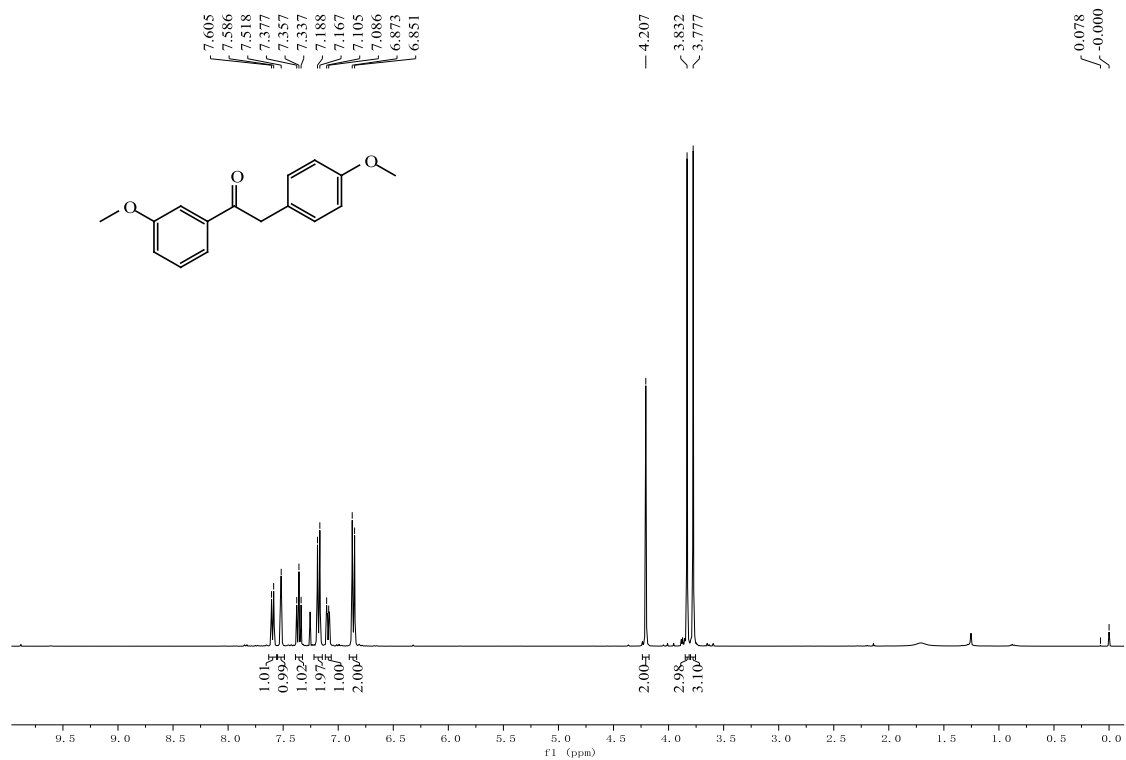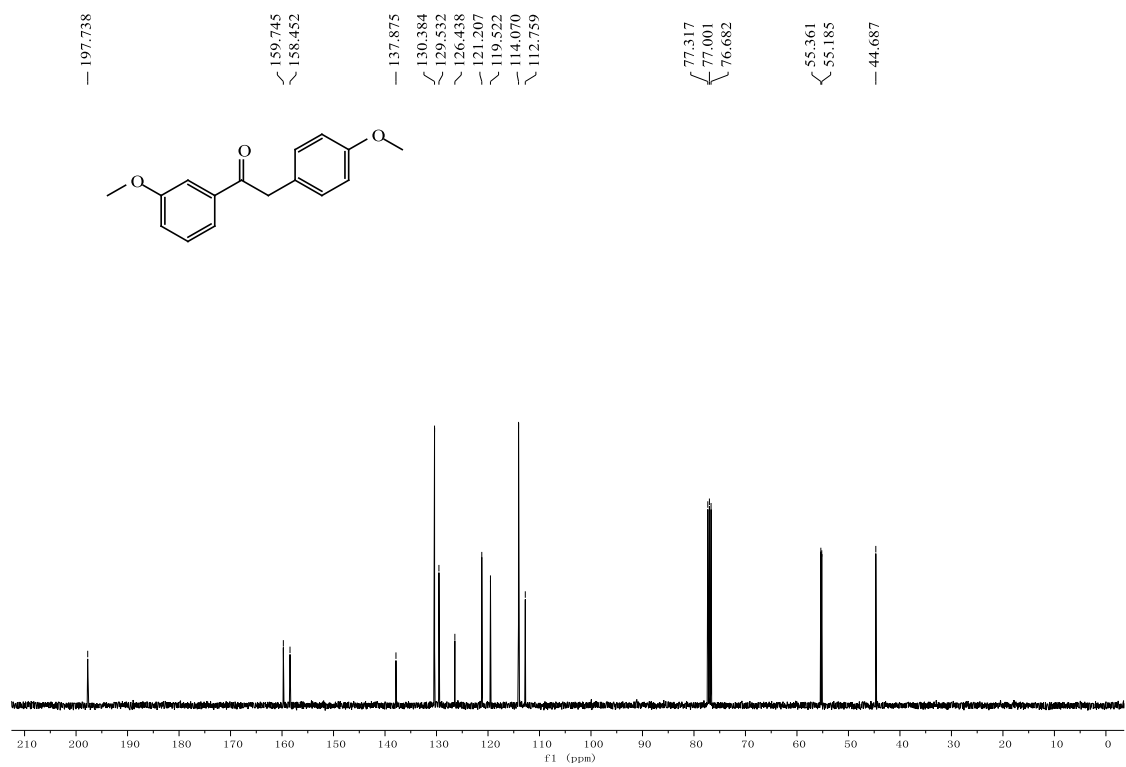

**2-(4-Methoxyphenyl)-1-(*o*-tolyl)ethan-1-one (3la)**

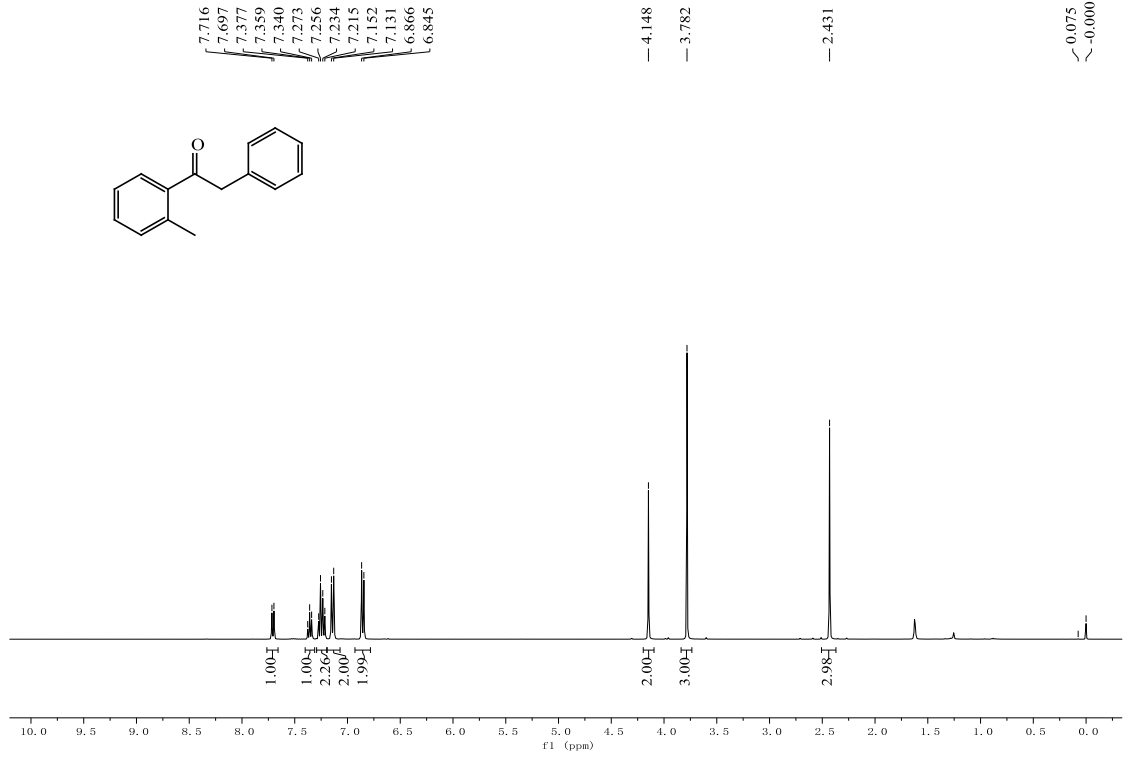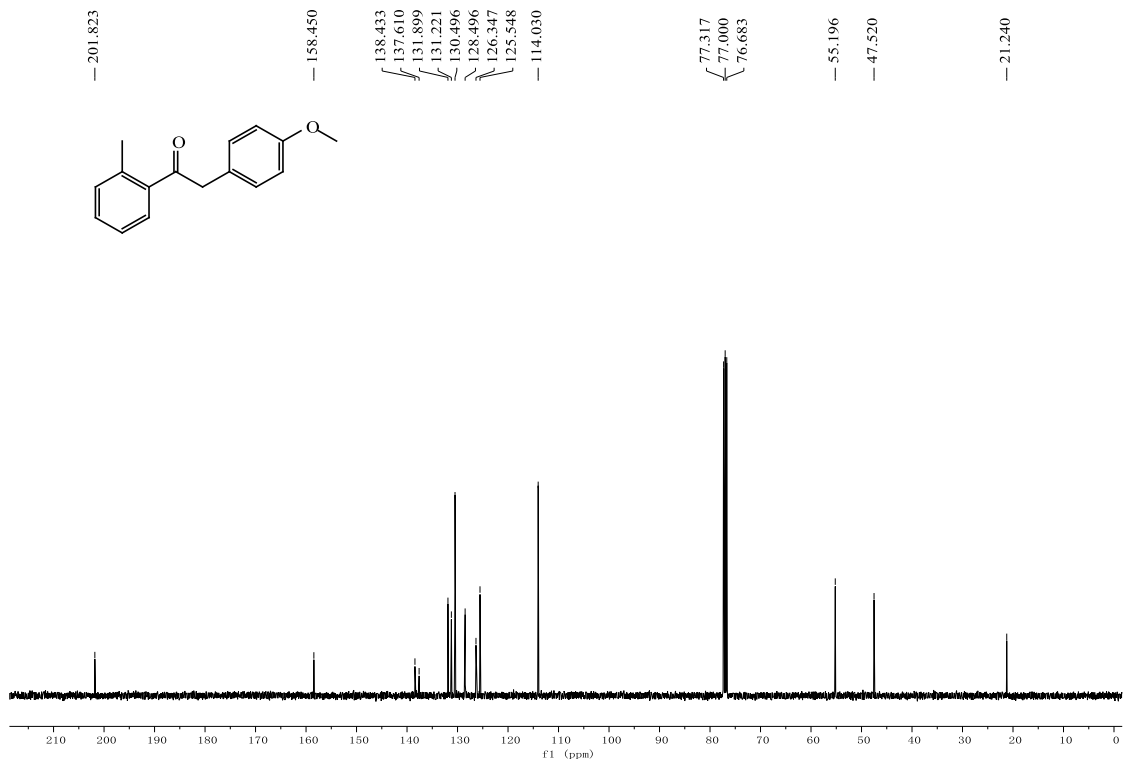

1-(3,5-Dimethylphenyl)-2-(4-methoxyphenyl)ethan-1-one (3ma)

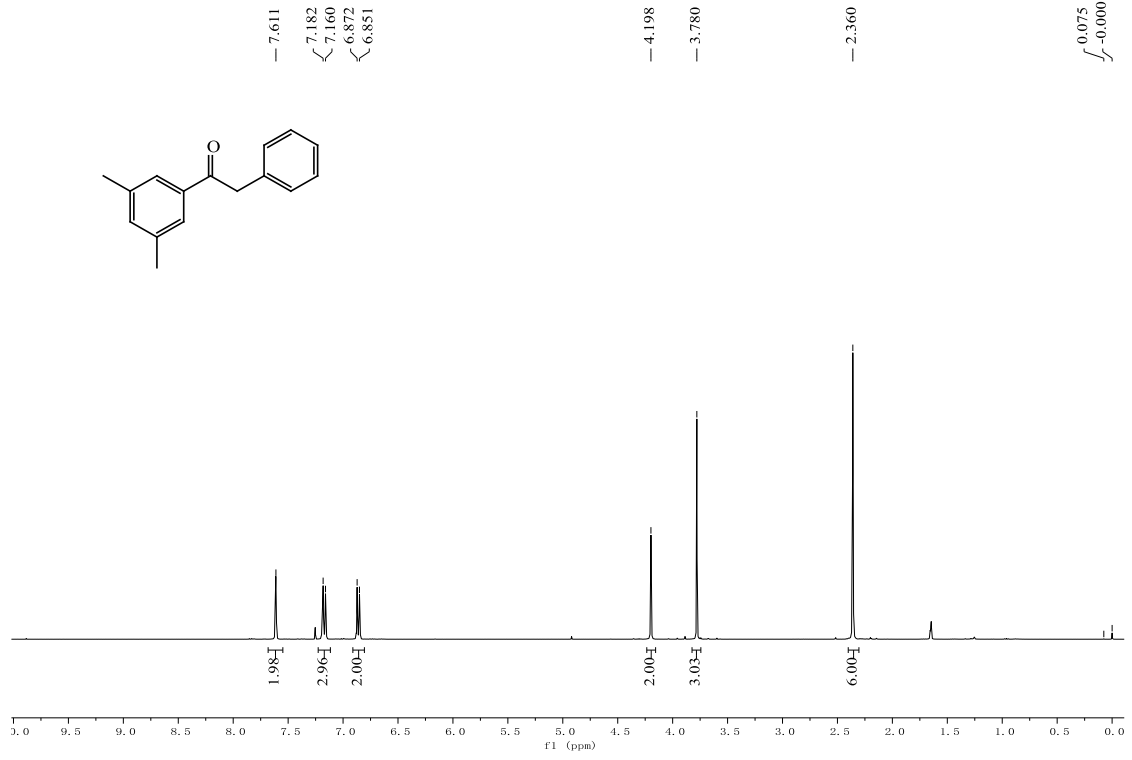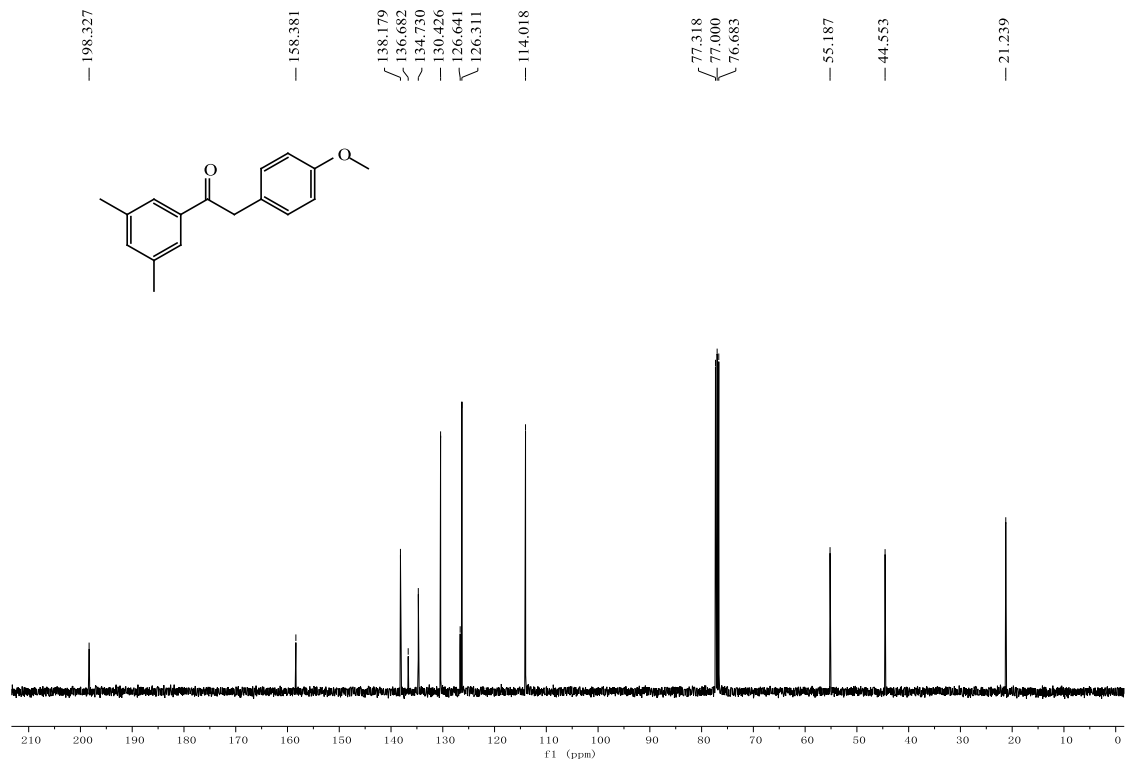





**1-Phenyl-2-(*p*-tolyl)ethan-1-one (3ab)**

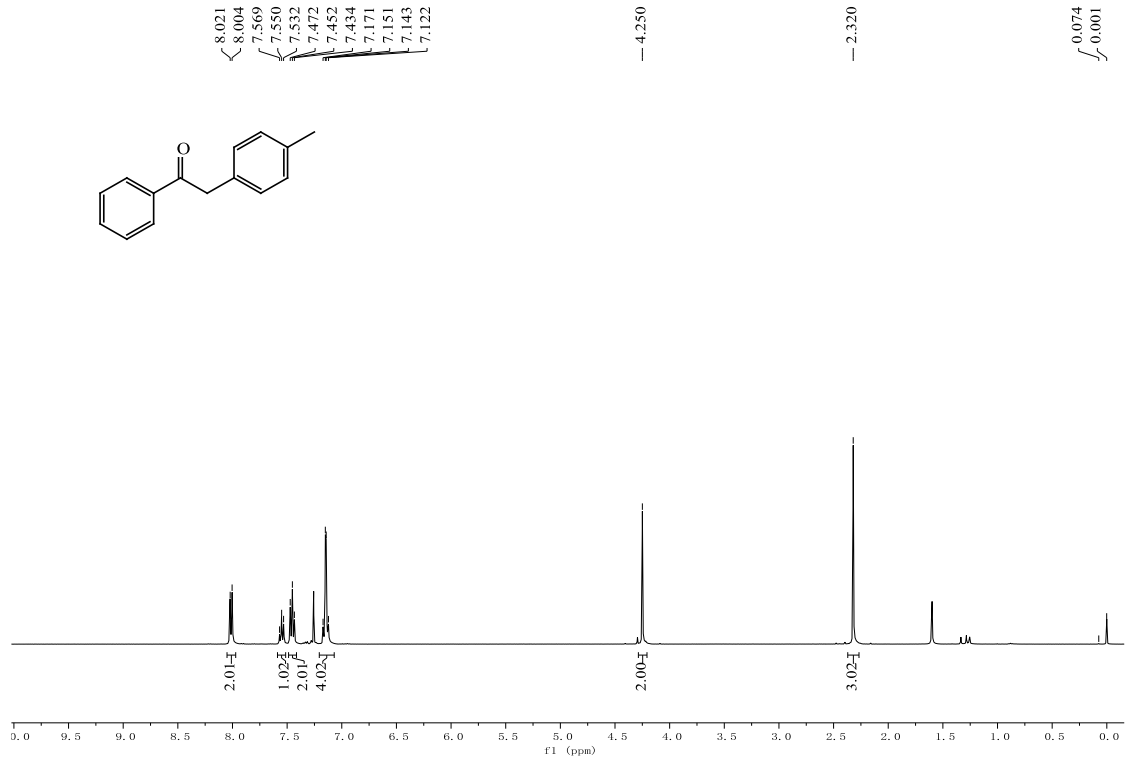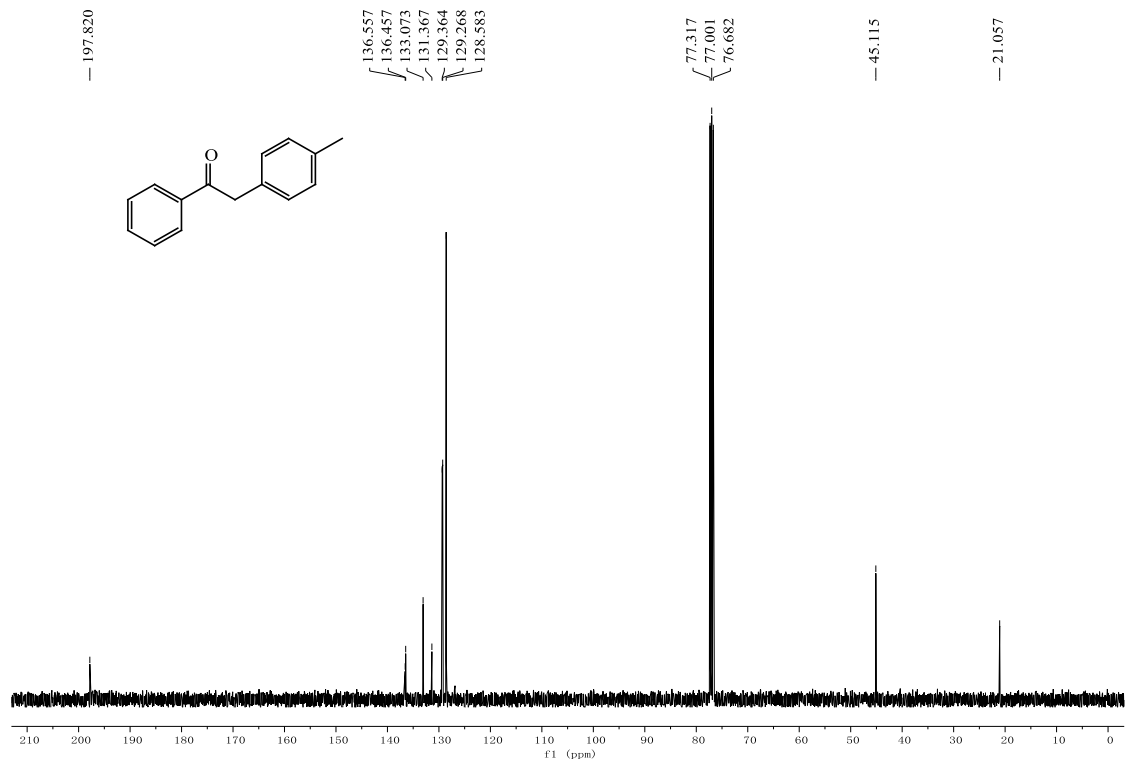

2-(4-(*tert*-Butyl)phenyl)-1-phenylethan-1-one (3ac)

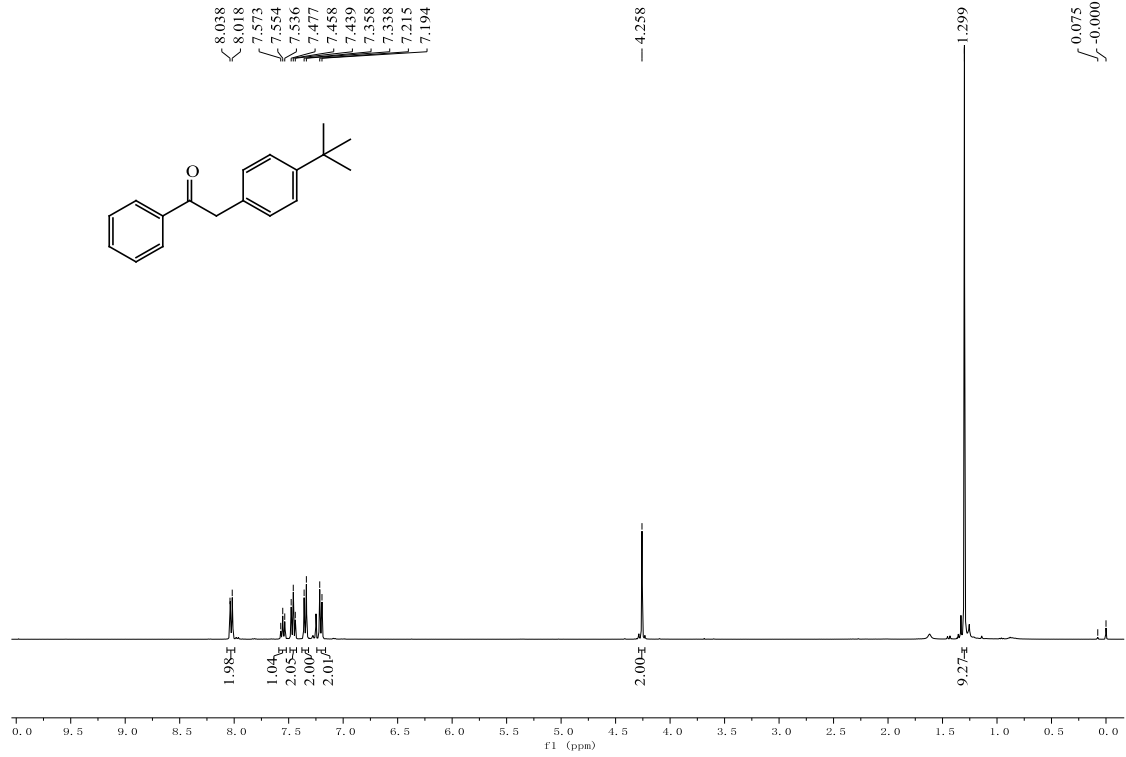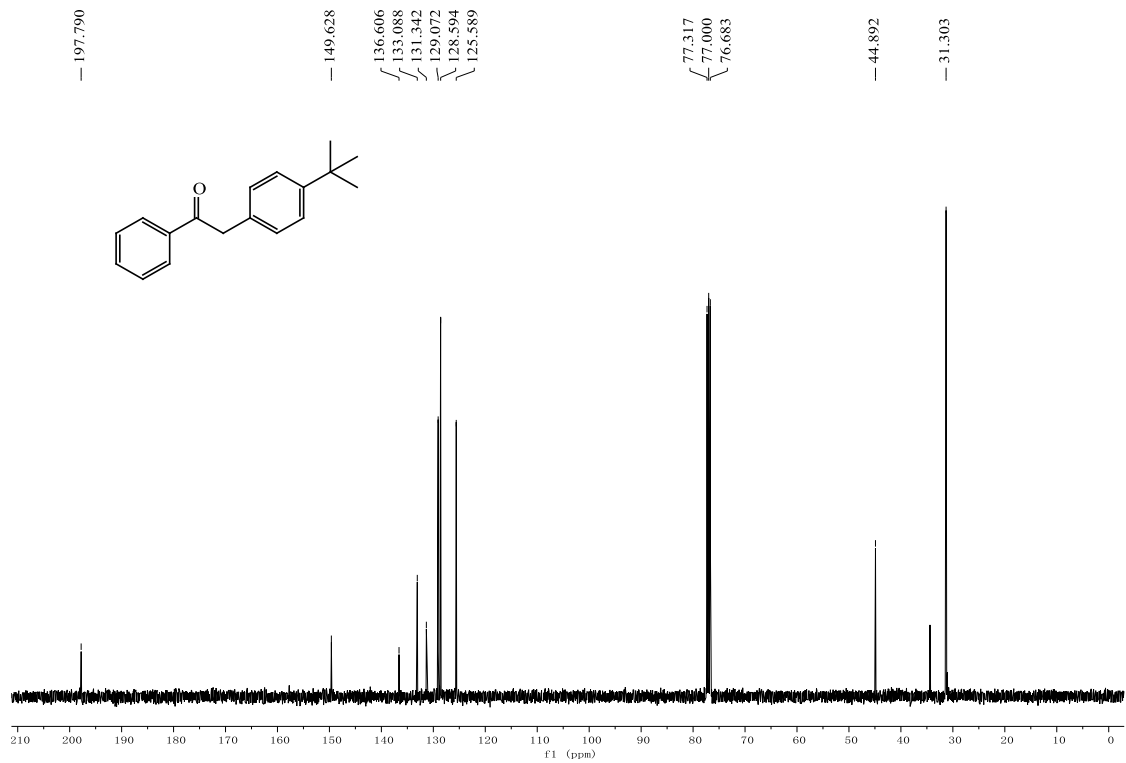

**2-(4-Isopropoxyphenyl)-1-phenylethan-1-one (3ad)**

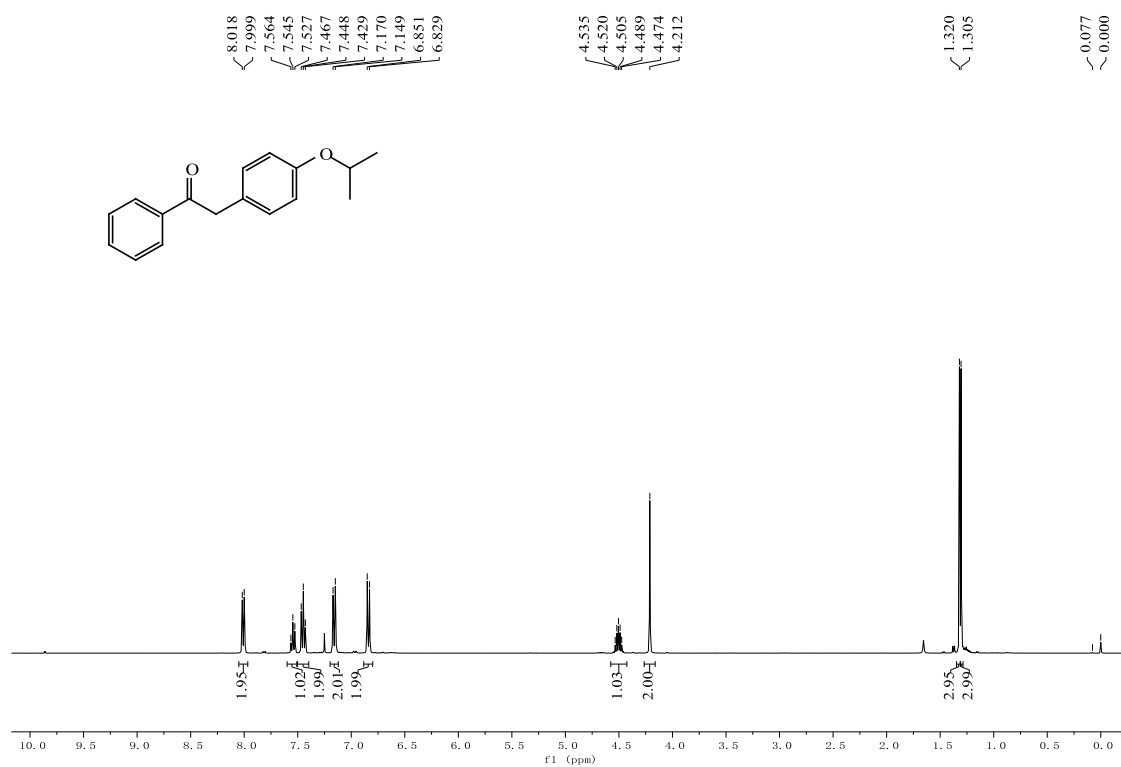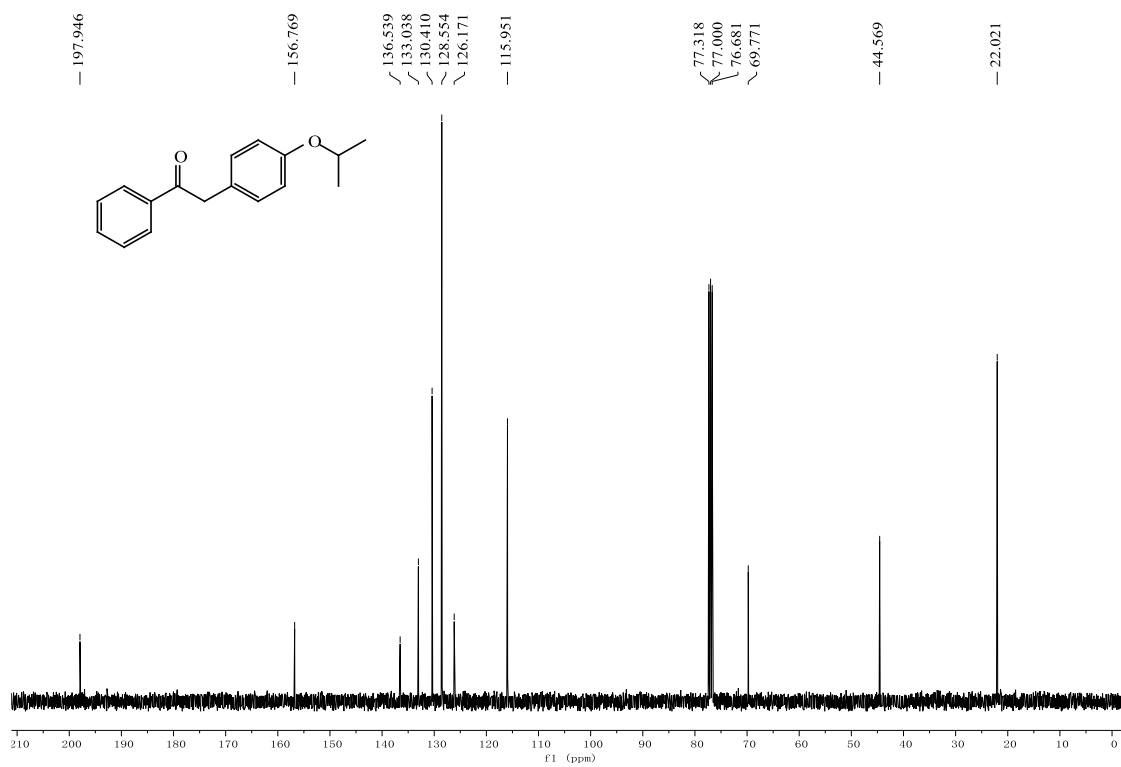

### 2-(4-Fluorophenyl)-1-phenylethan-1-one (3ae)

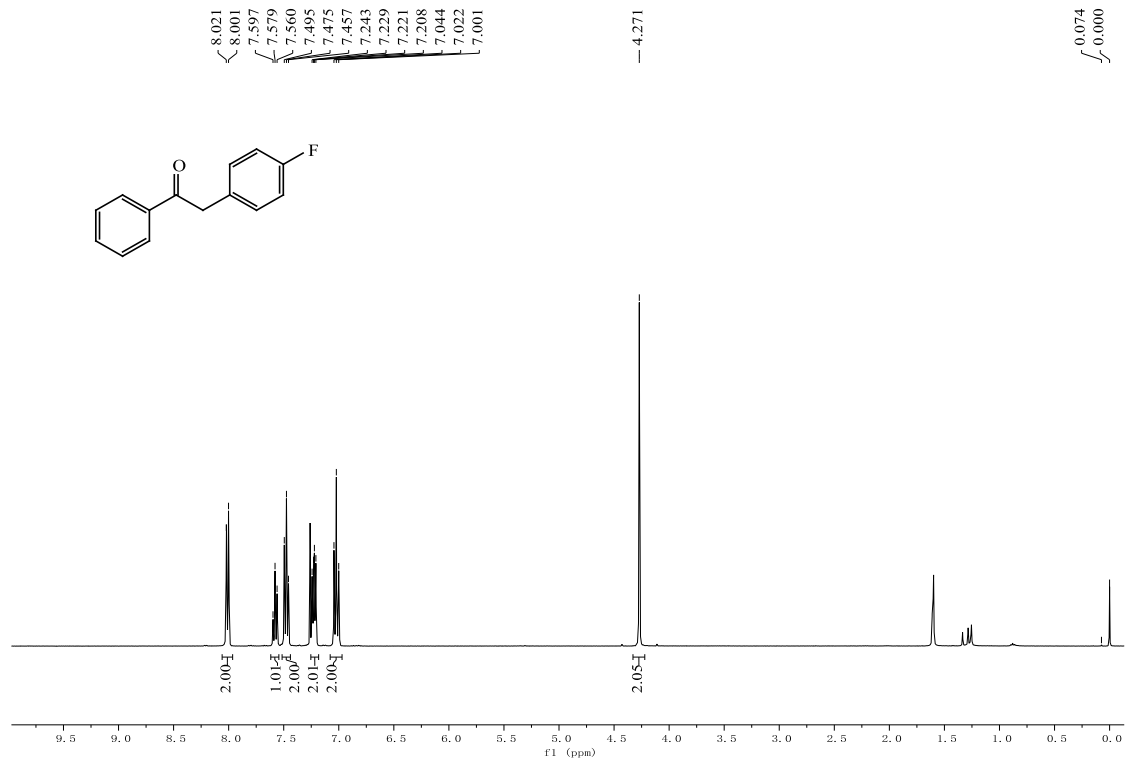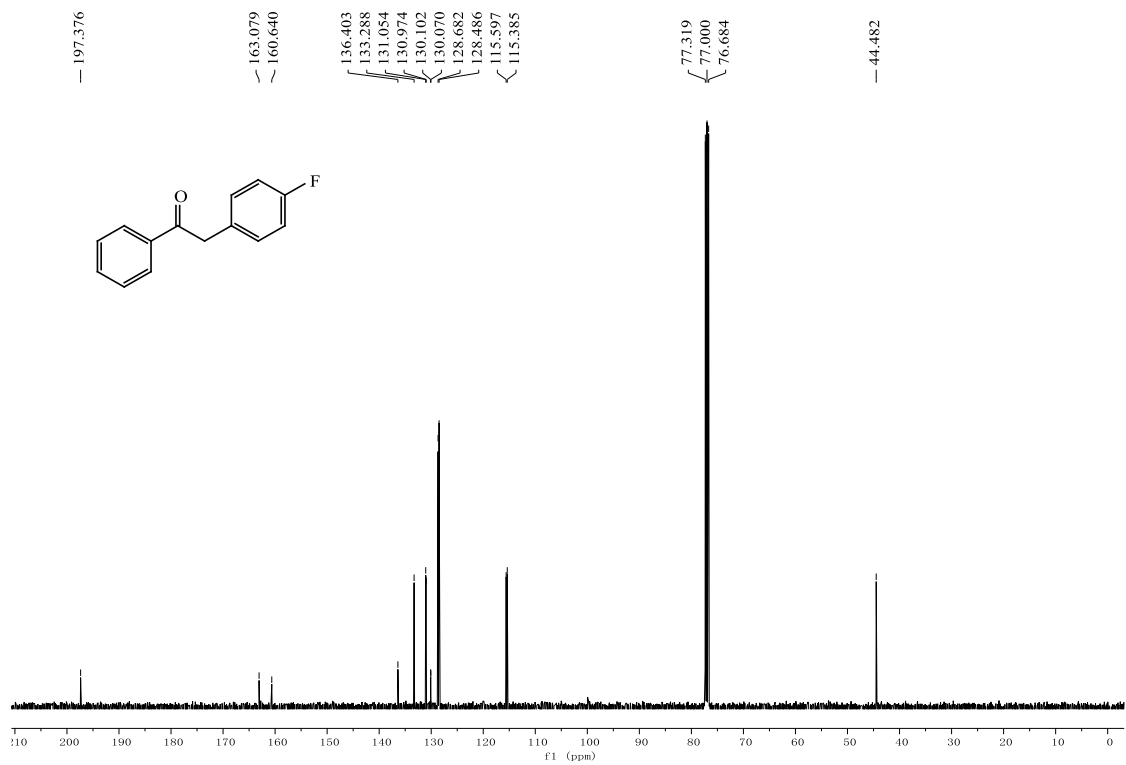

### 2-(4-Chlorophenyl)-1-phenylethan-1-one (3af)

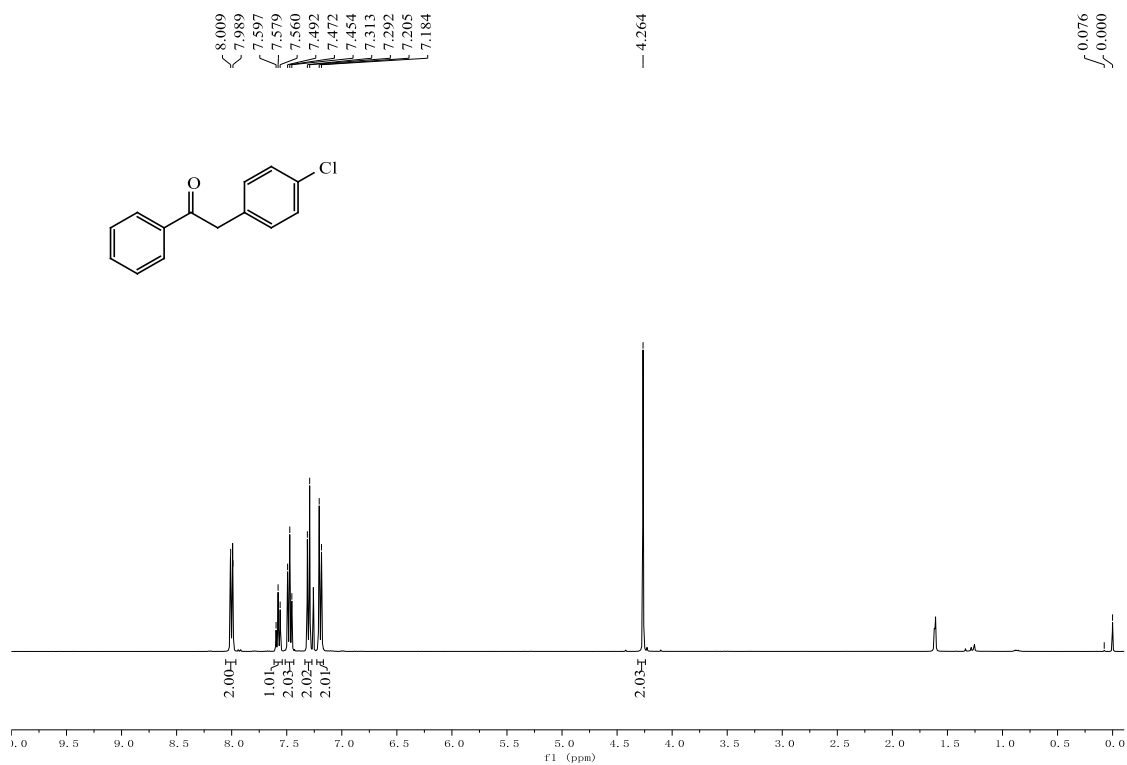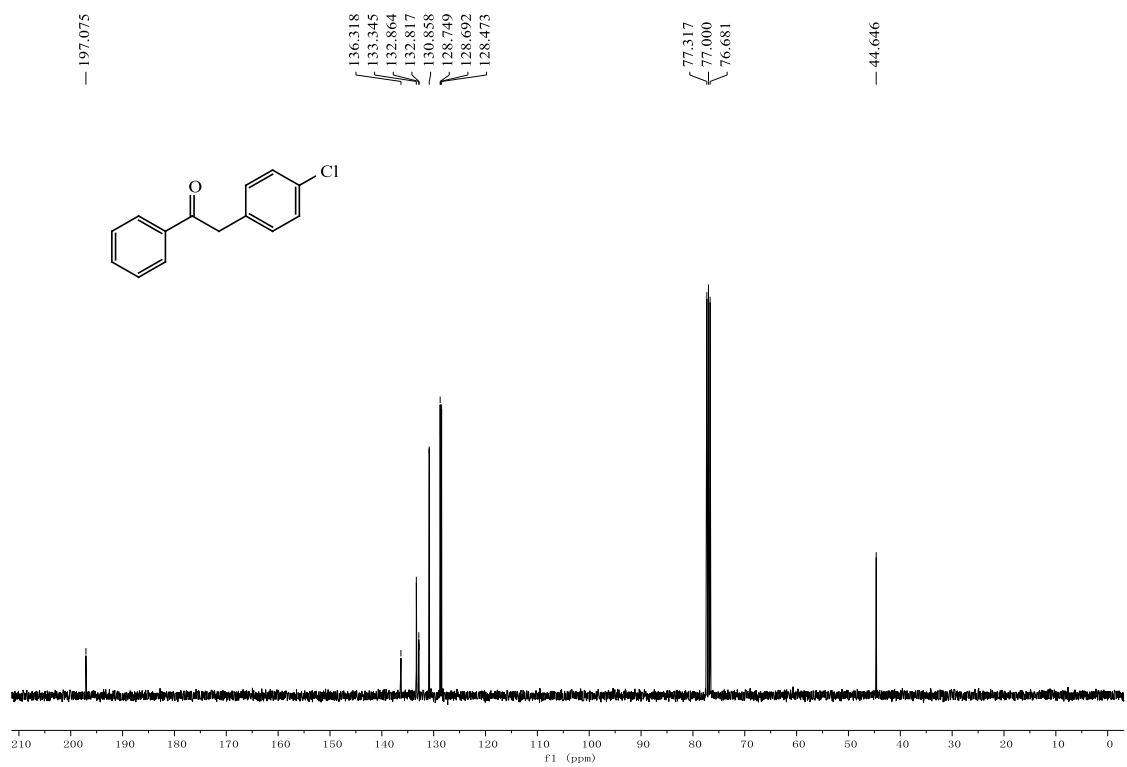

# 1,2-Diphenylethan-1-one (3ag)

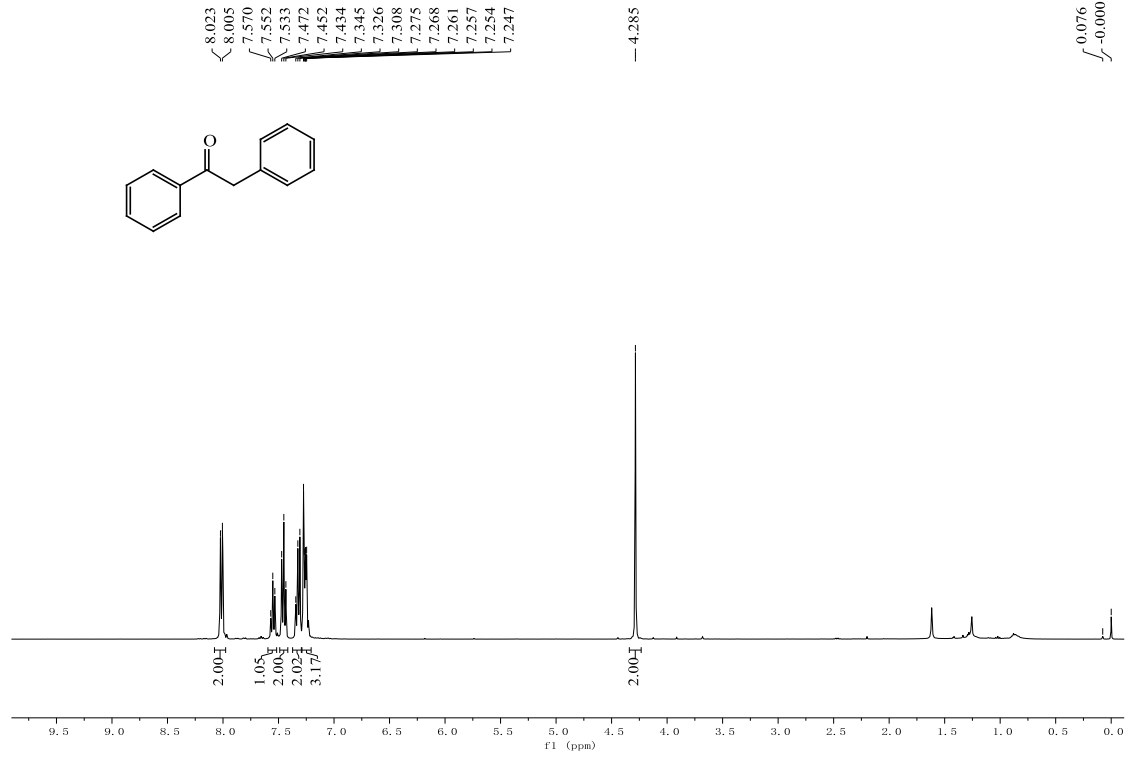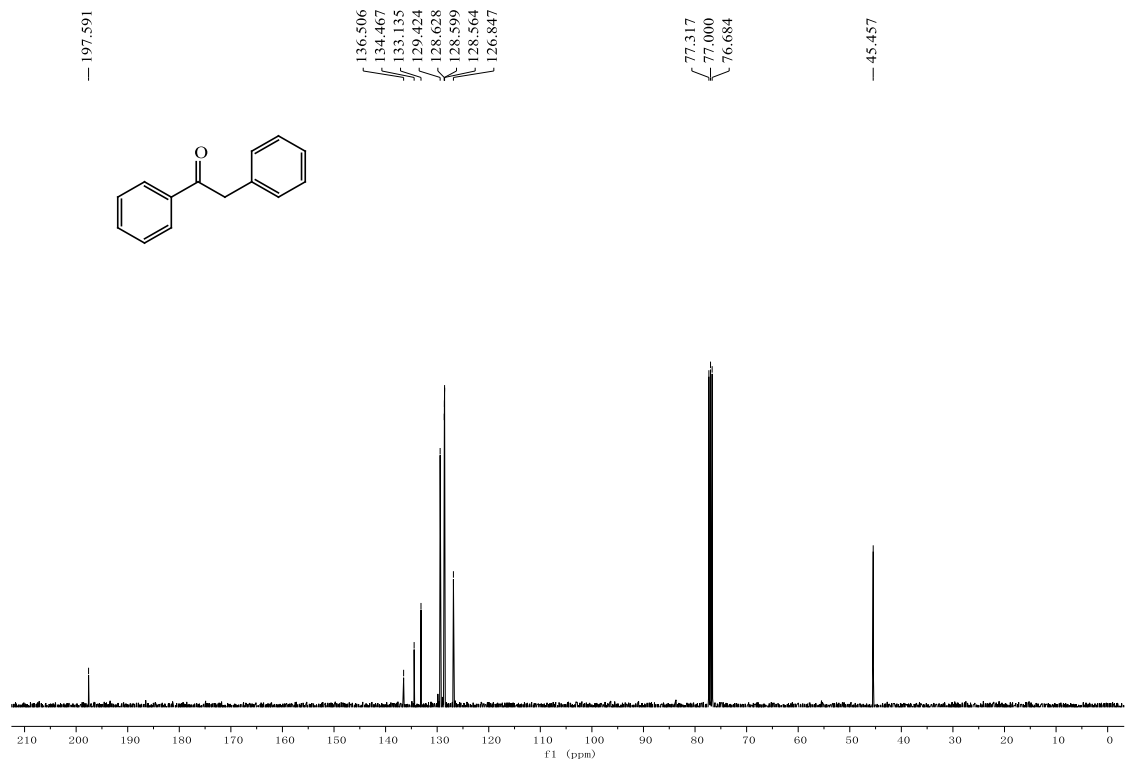

### 1-Phenyl-2-(*m*-tolyl)ethan-1-one (3ah)

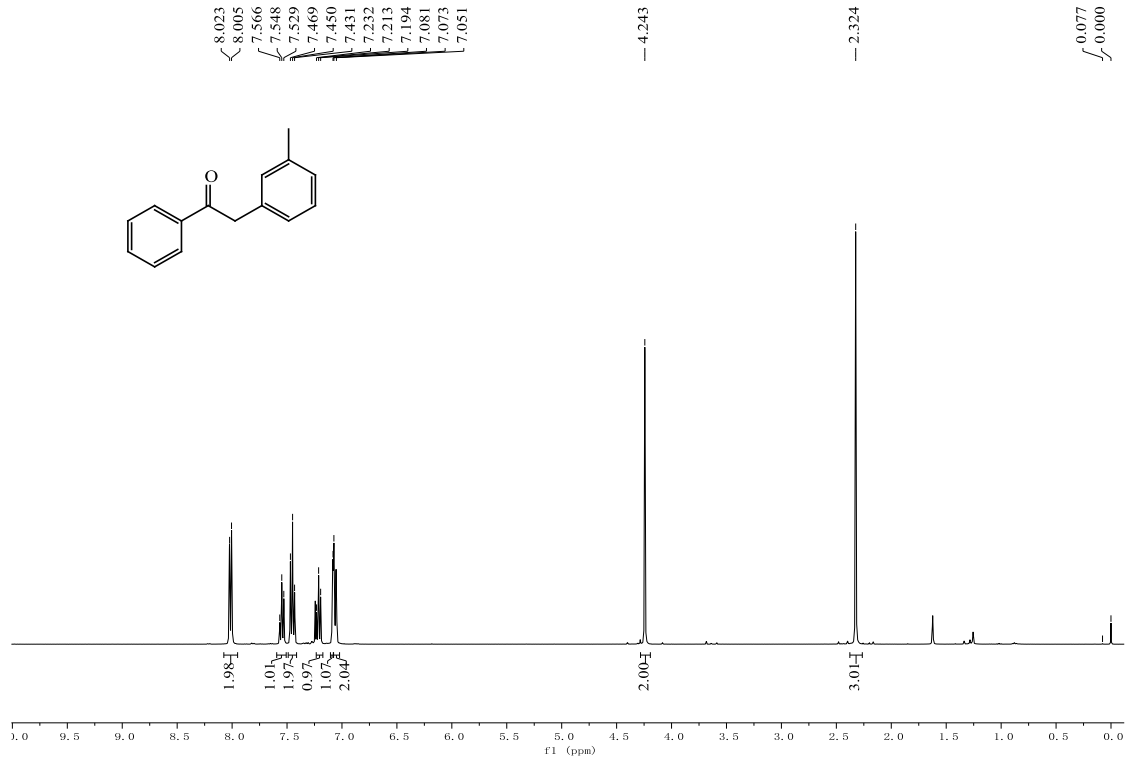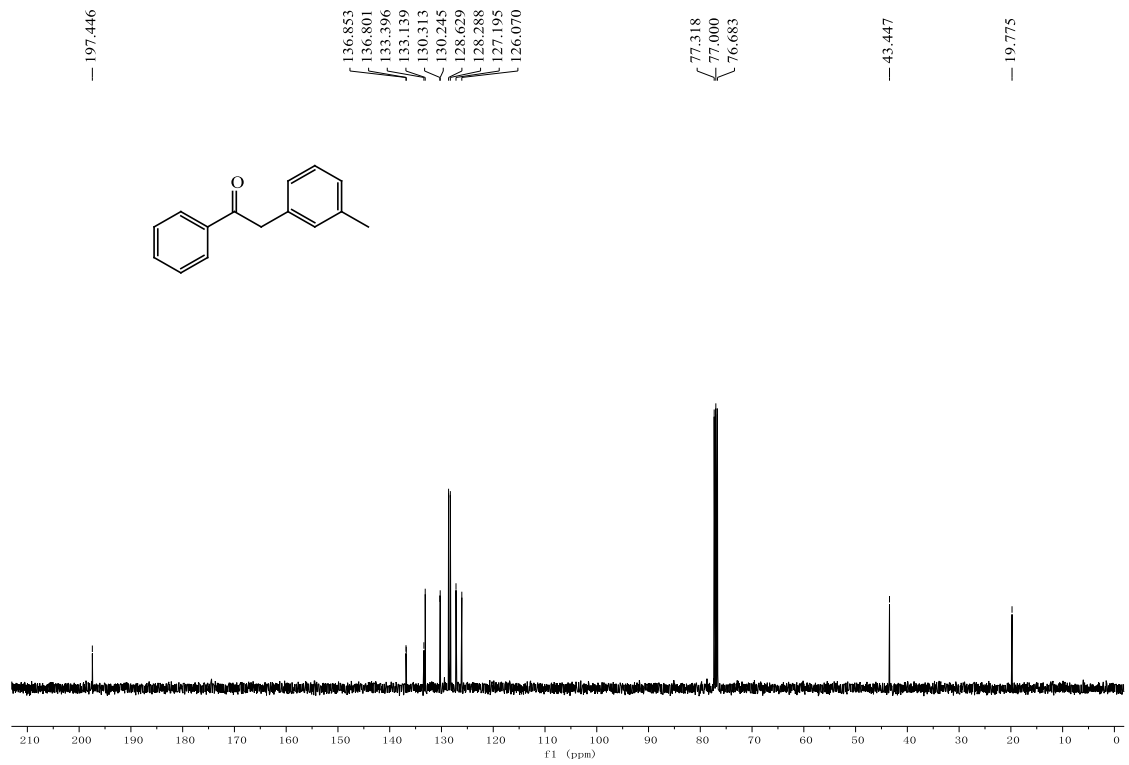

### 2-(3-Chlorophenyl)-1-phenylethan-1-one (3ai)

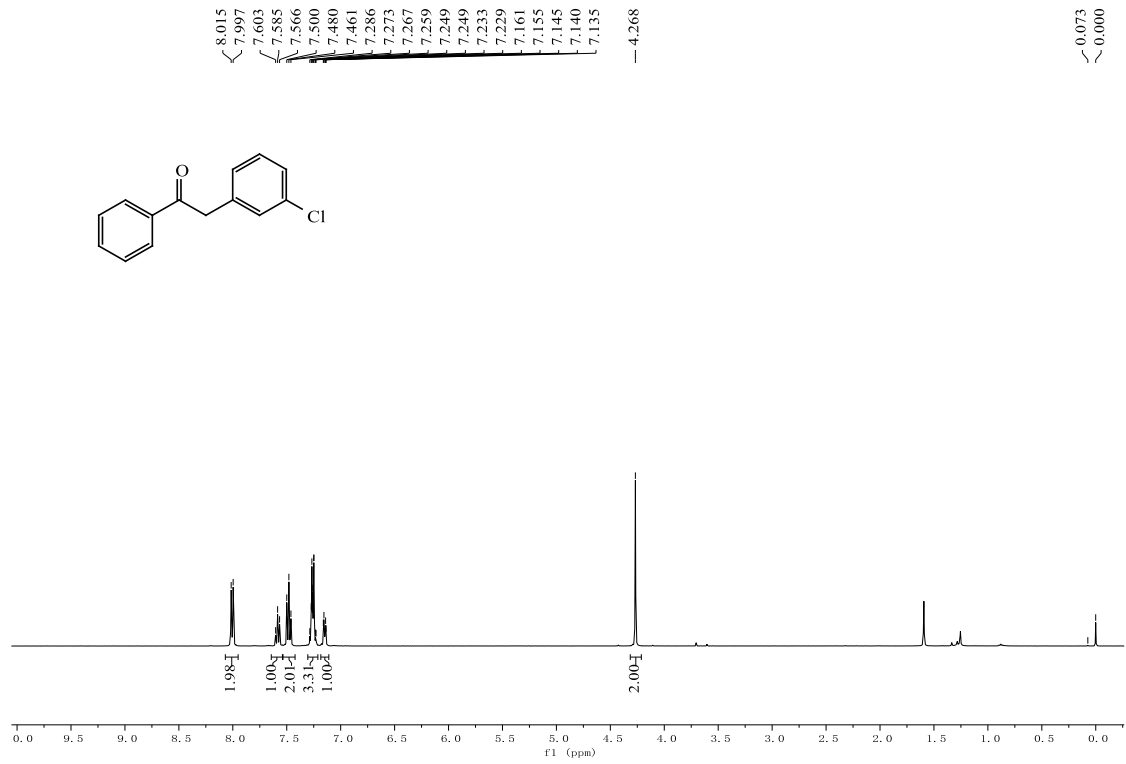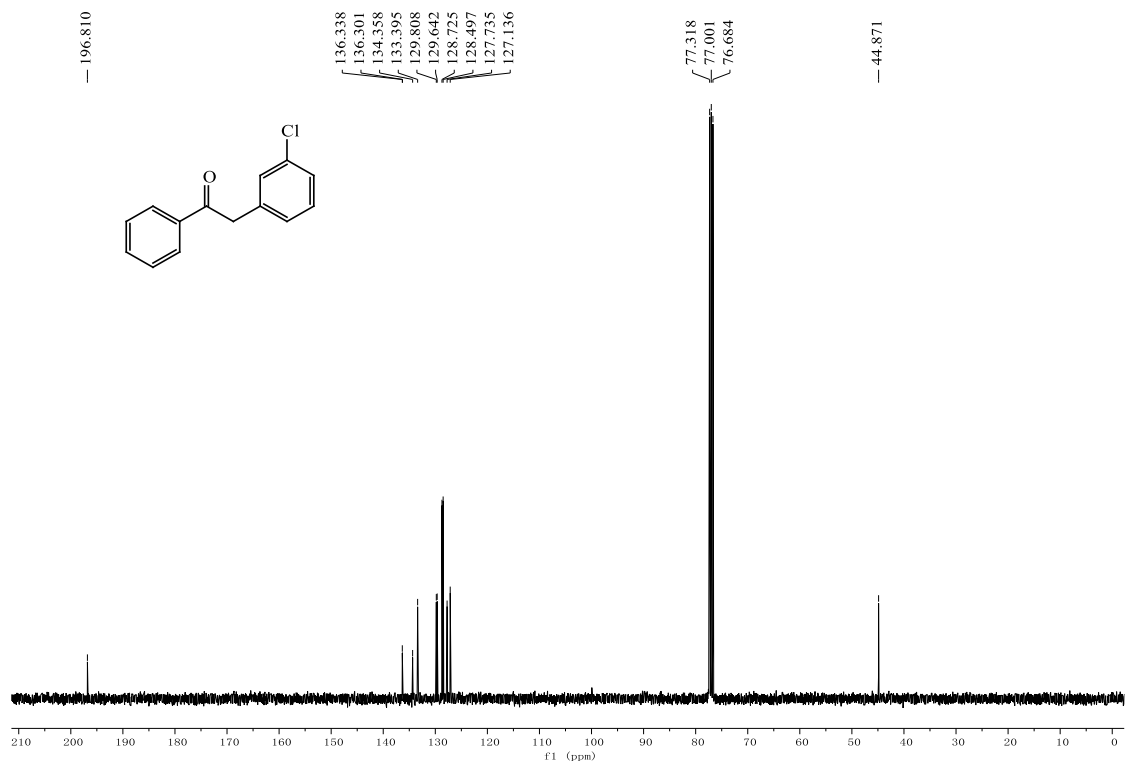



# 1-Phenyl-2-(*o*-tolyl)ethan-1-one (3aj)

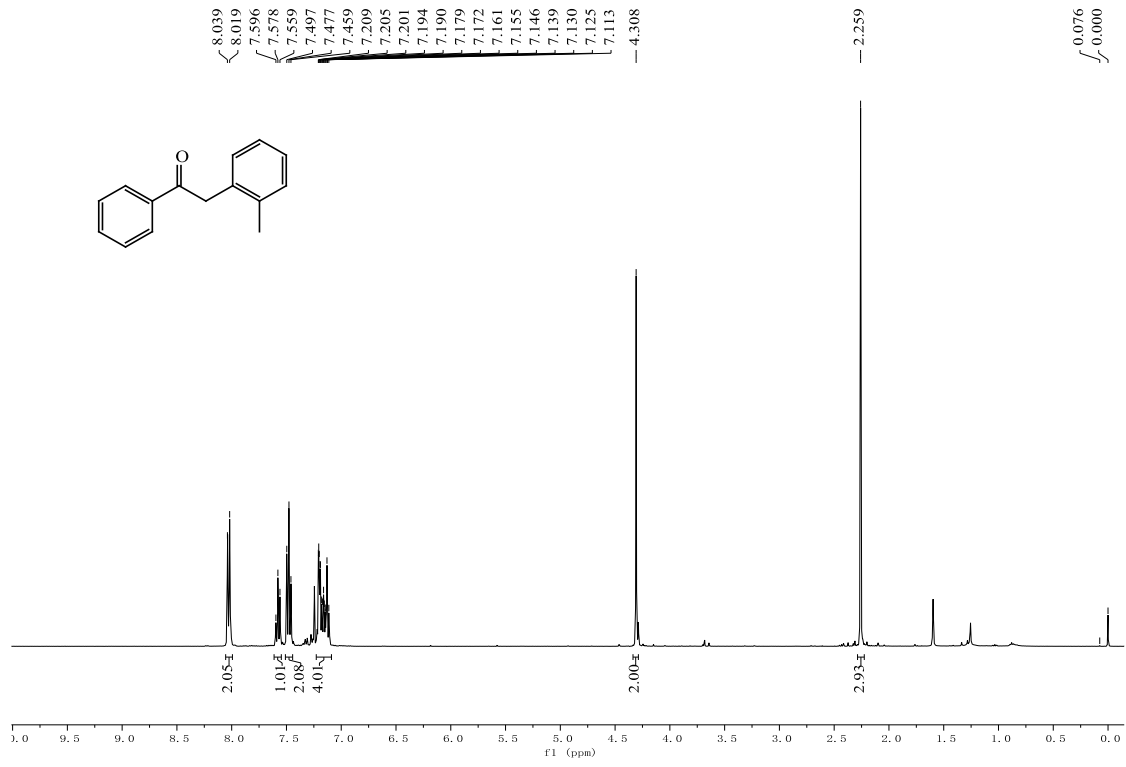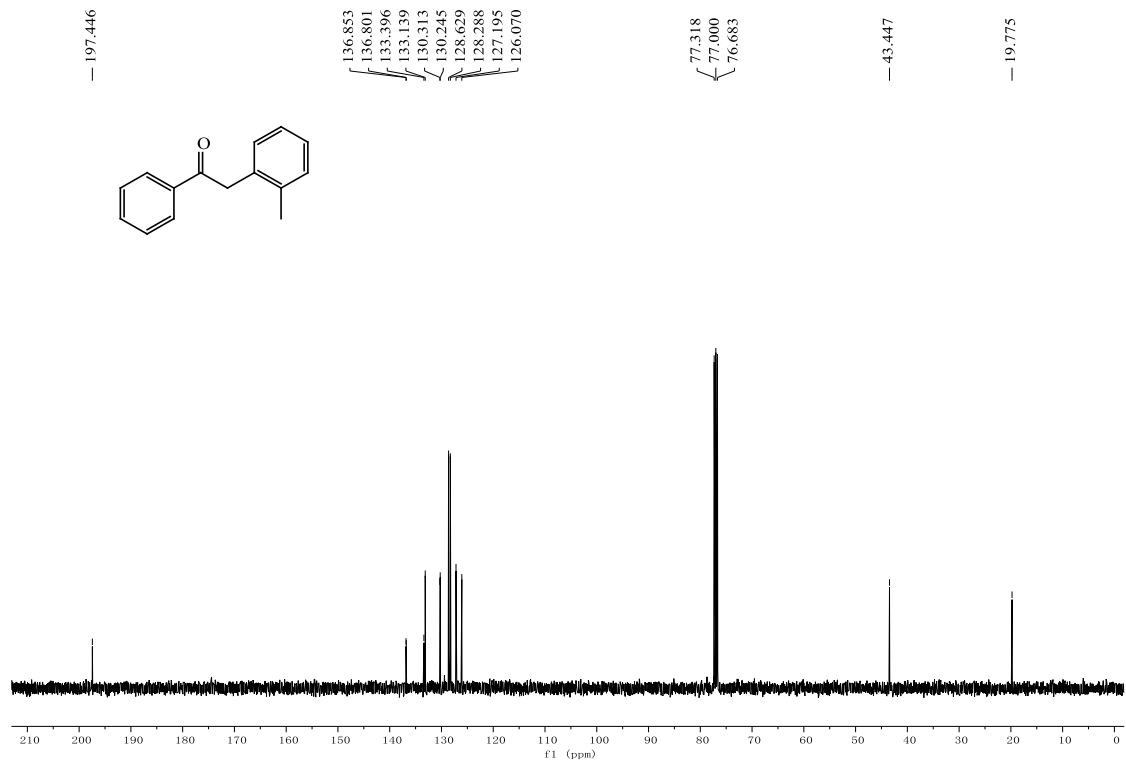

### 2-(2-Fluorophenyl)-1-phenylethan-1-one (3ak)

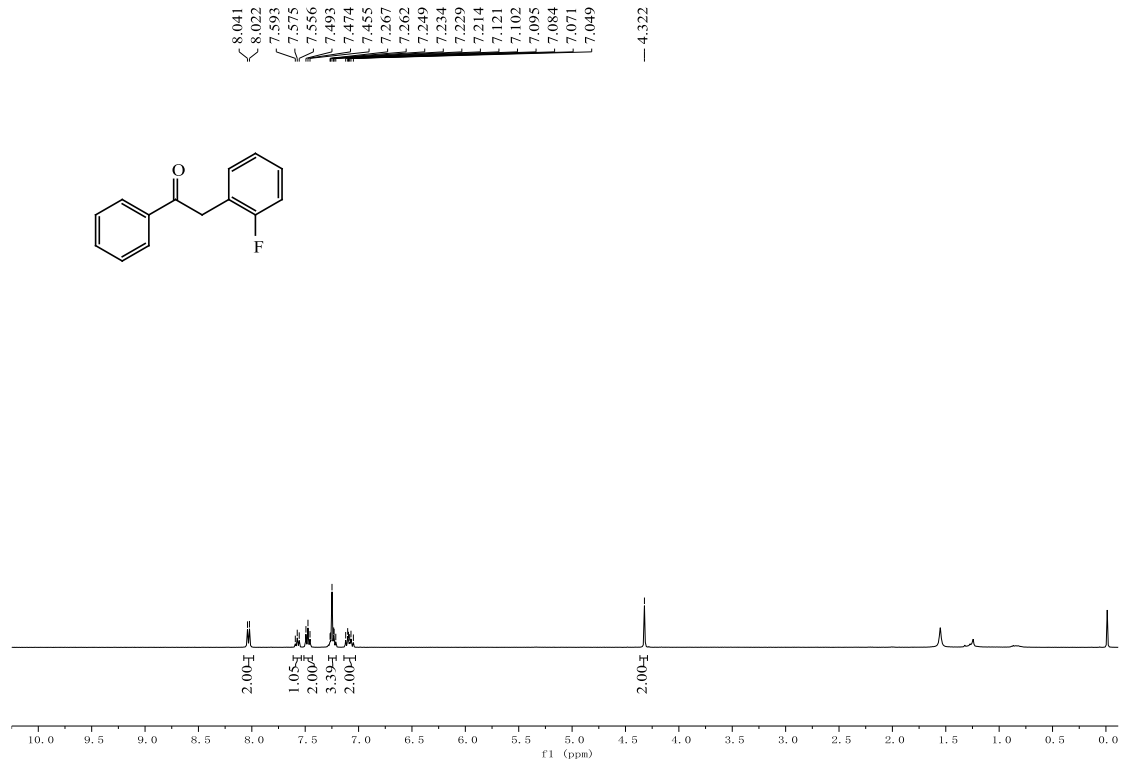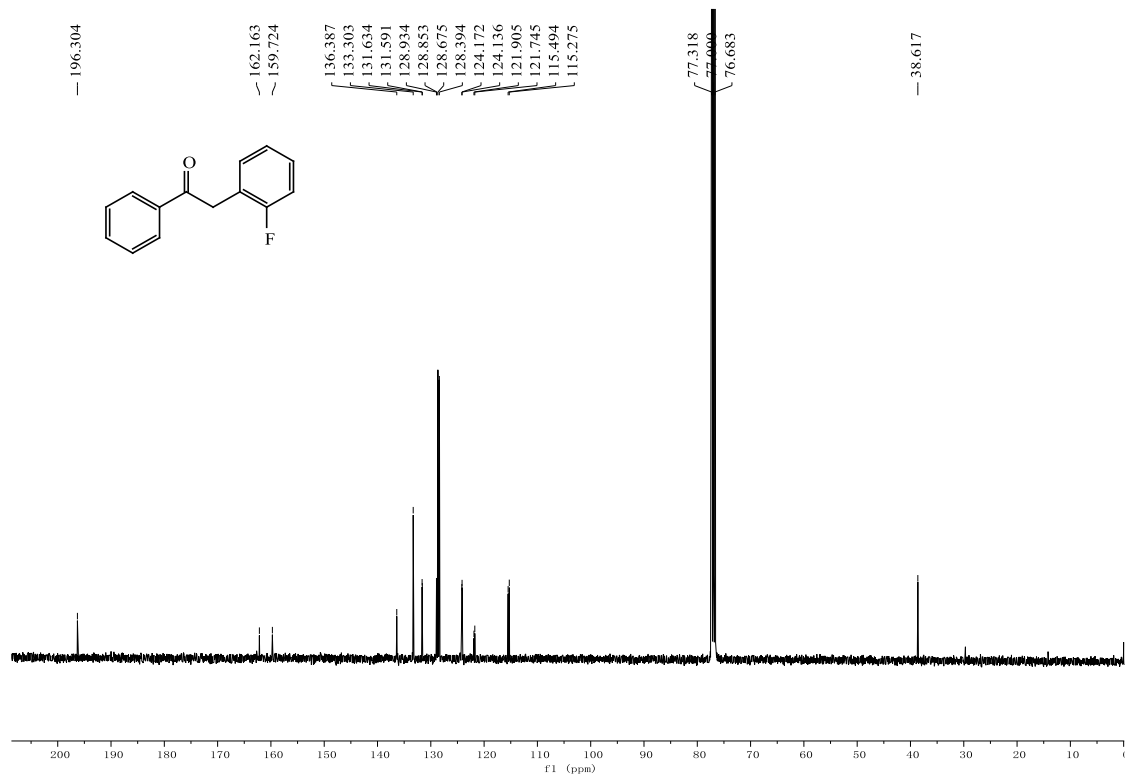

2-(3,5-Dimethylphenyl)-1-phenylethan-1-one (3a)

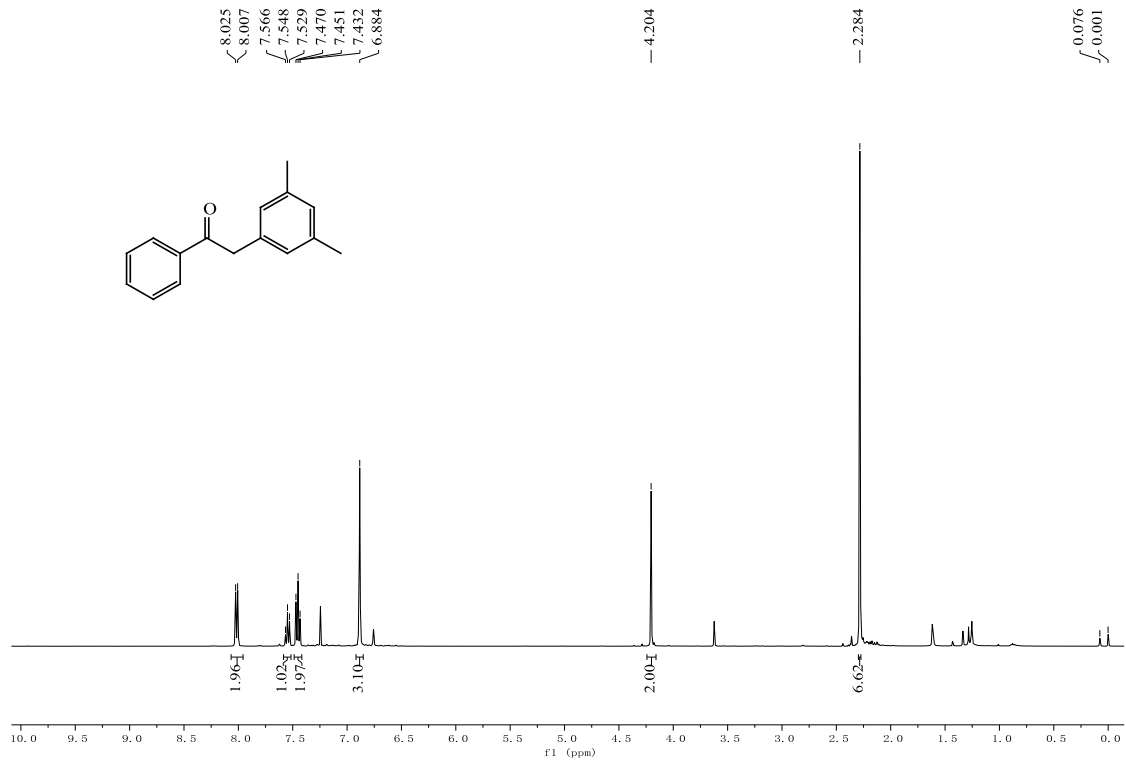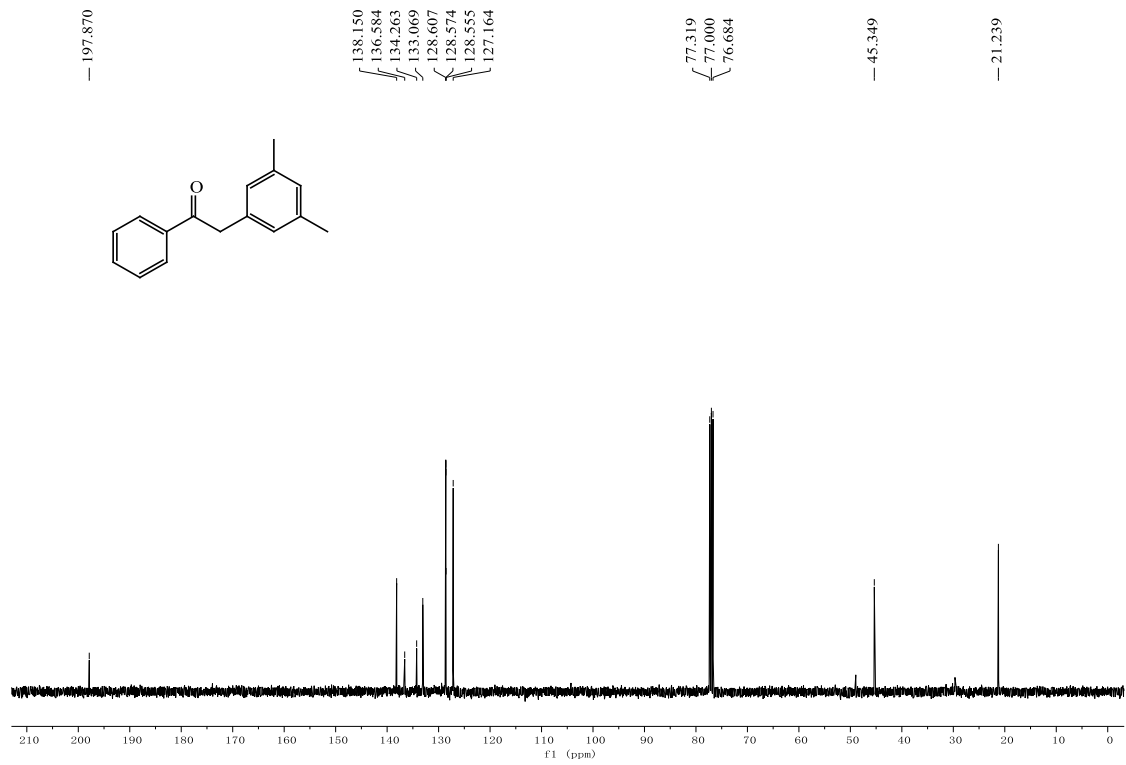

# 1-Phenyl-2-(thiophen-2-yl)ethan-1-one (3am)

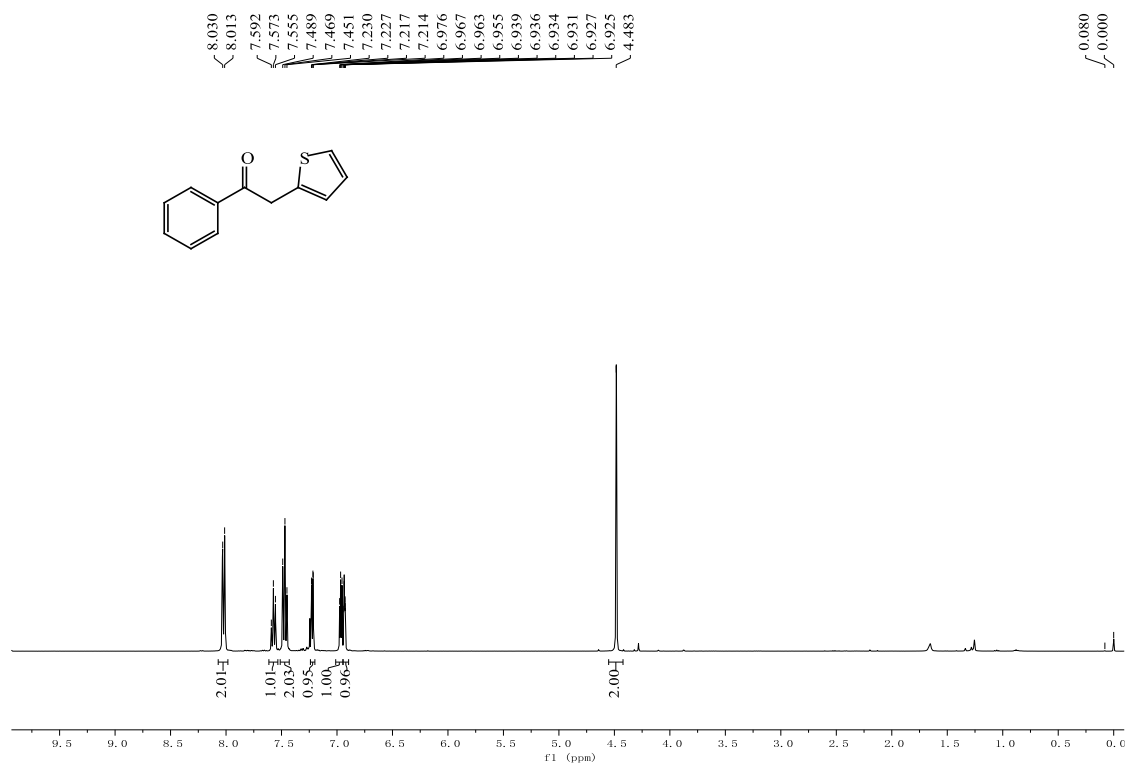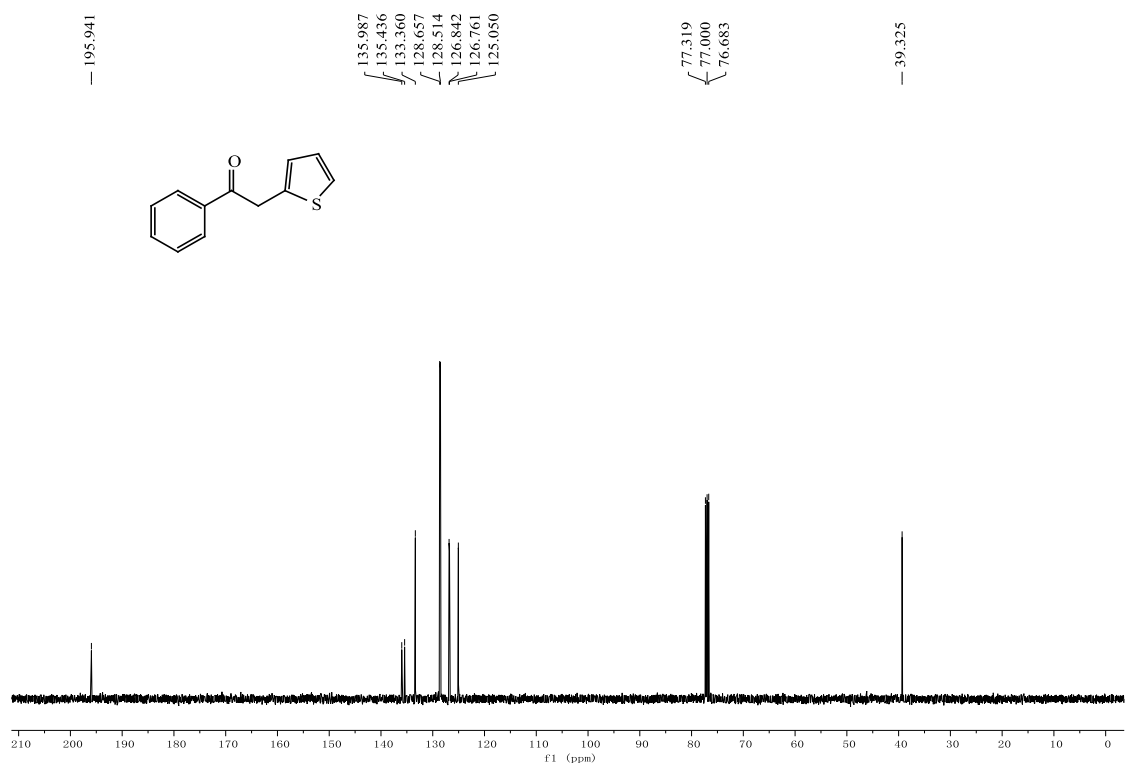

**2-(4-(2-Chloroethoxy)phenyl)-1-phenylethan-1-one(3an)**

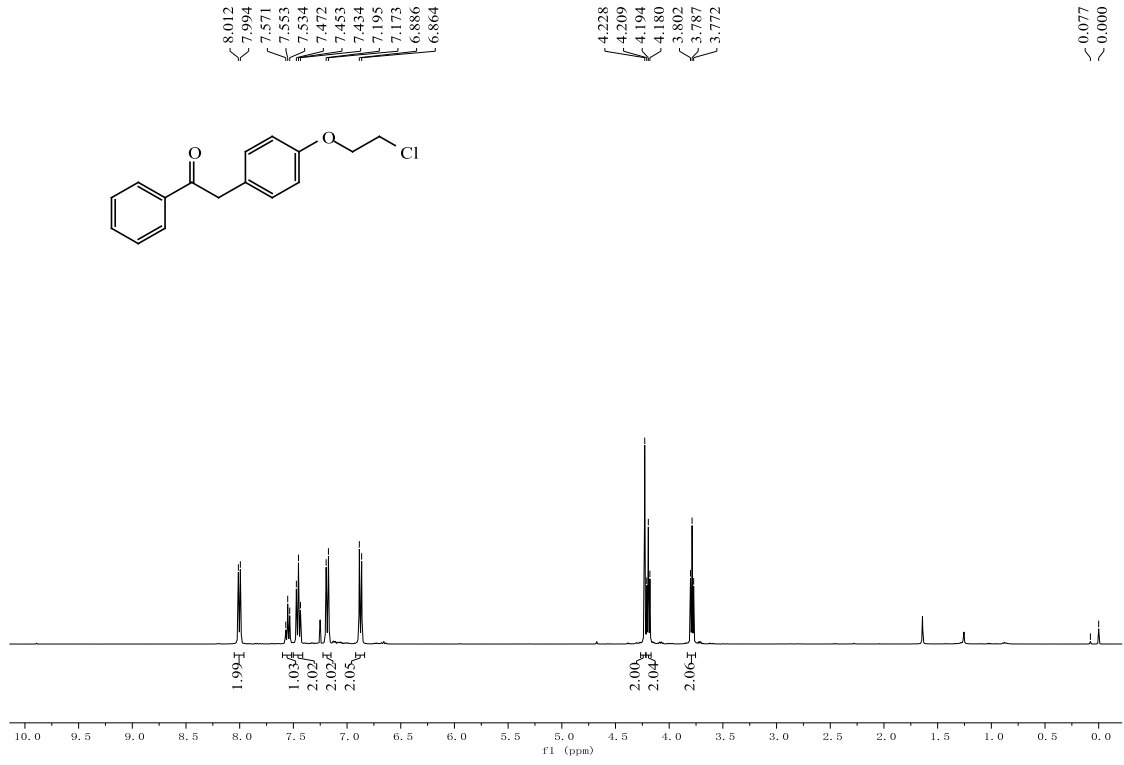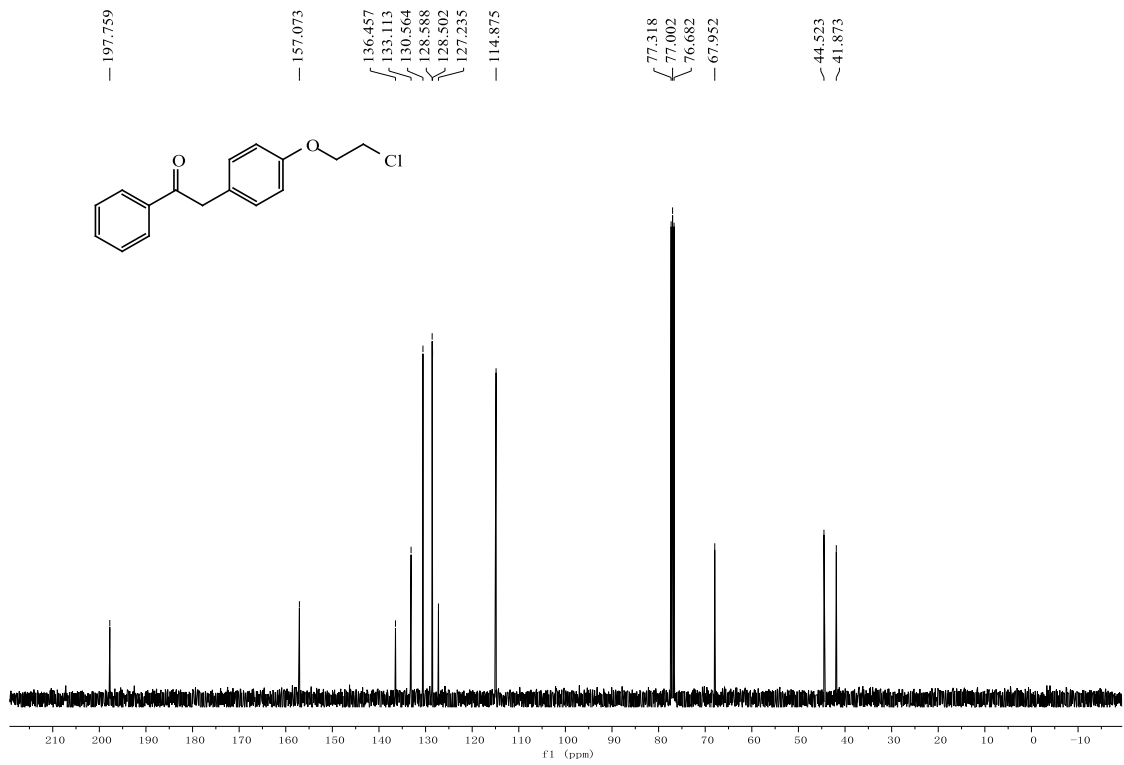

2-(4-(2-Oxo-2-phenylethyl)phenoxy)ethyl acetate (3ao)

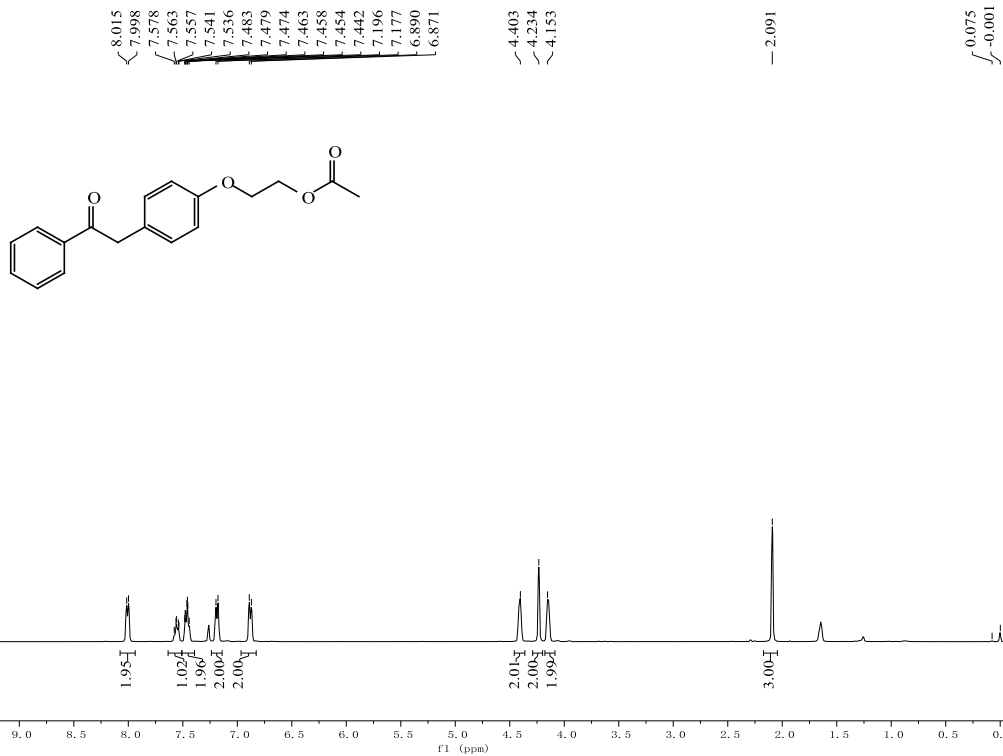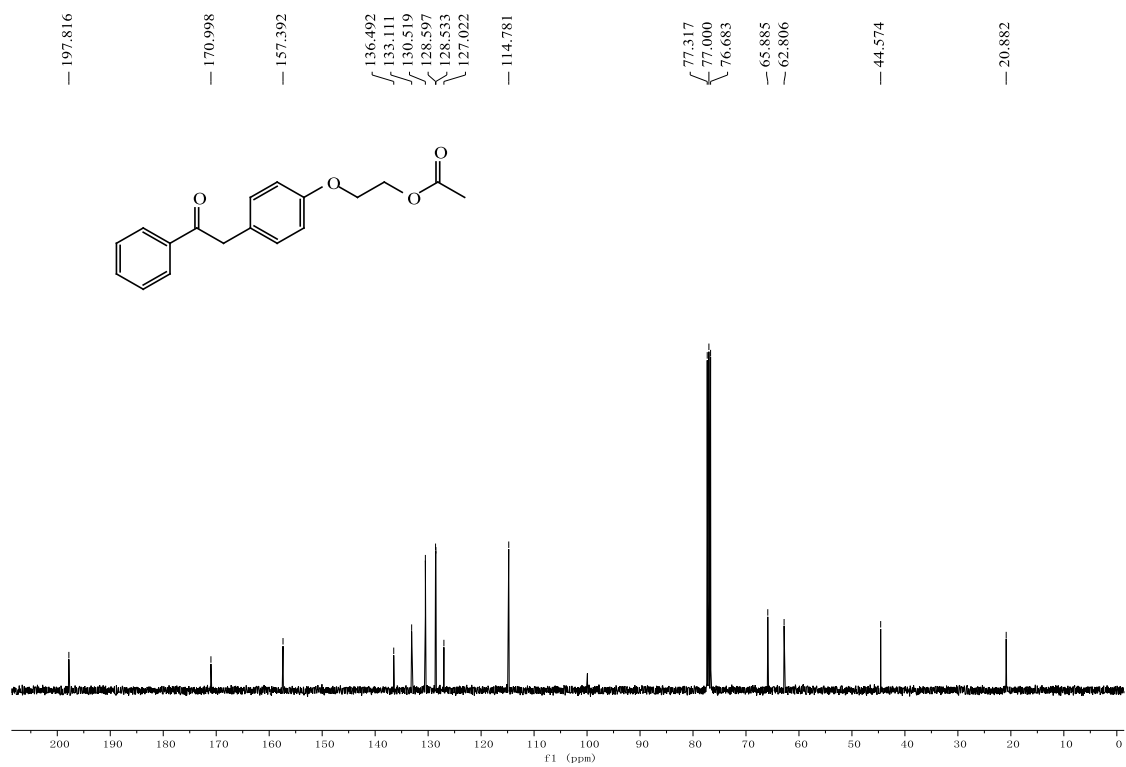

2-(4-(2-Oxo-2-phenylethyl)phenoxy)ethyl benzoate (3ap)

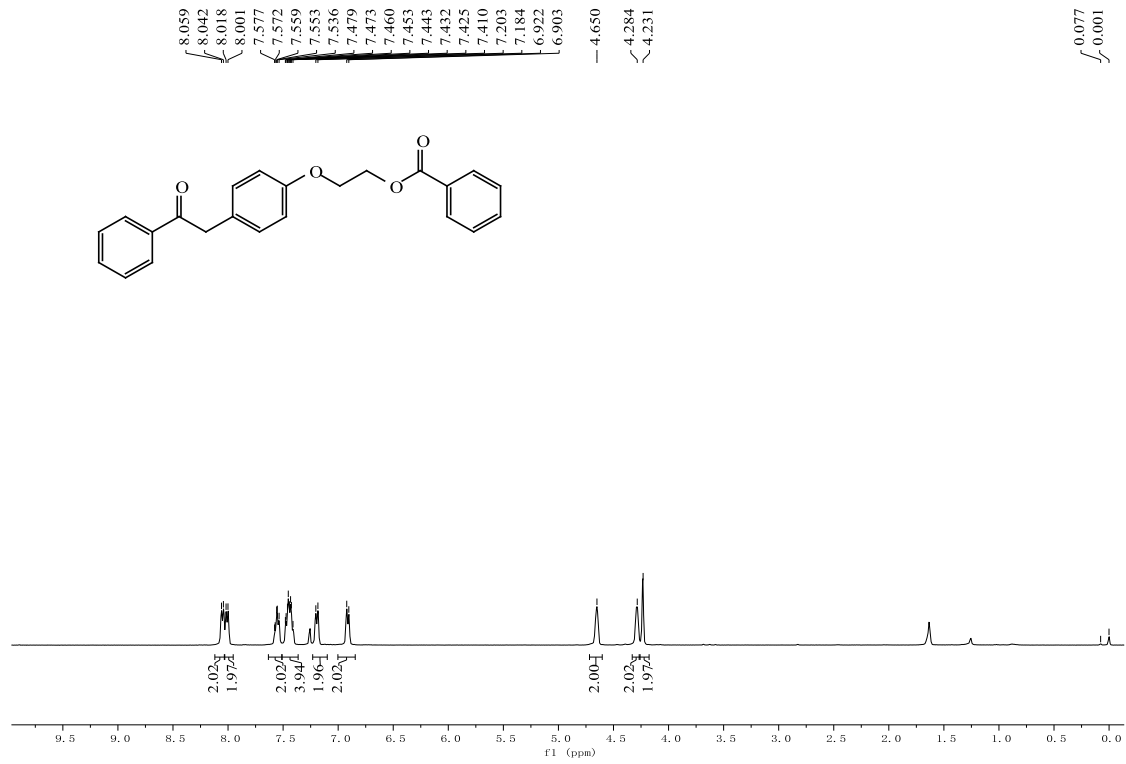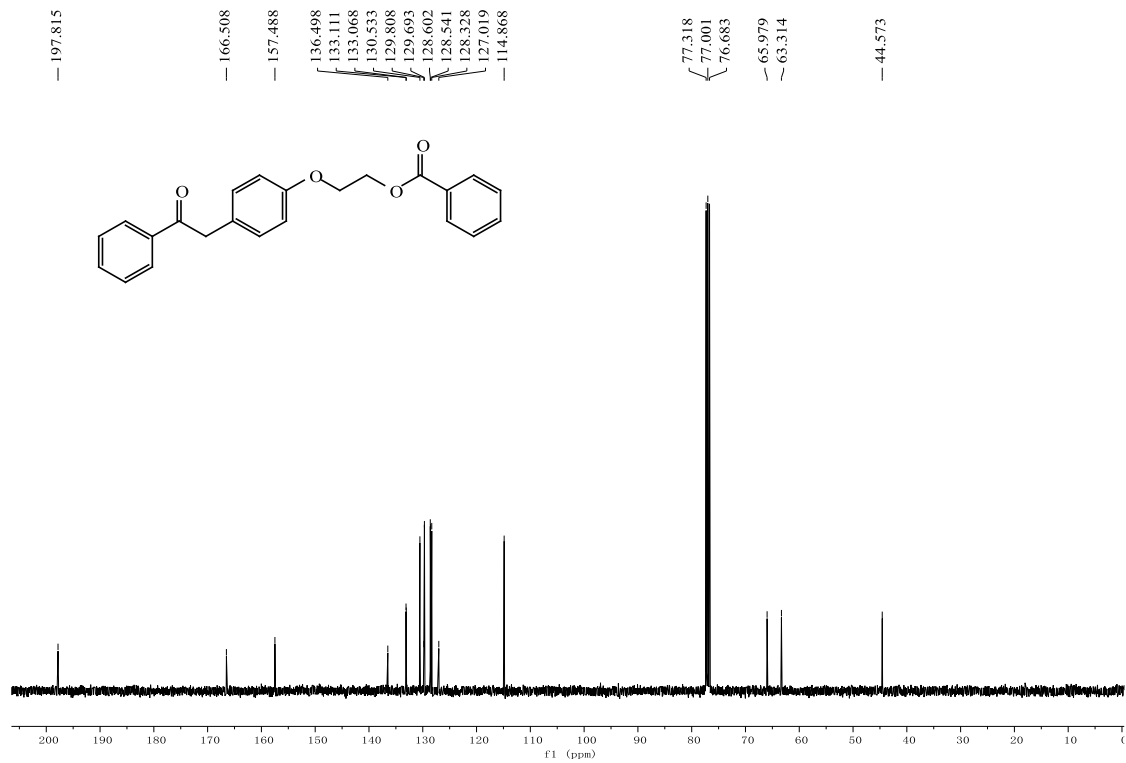

2-(2,6-Di-*tert*-butyl-4-hydroxyphenyl)-1-phenylethan-1-one (3ar)

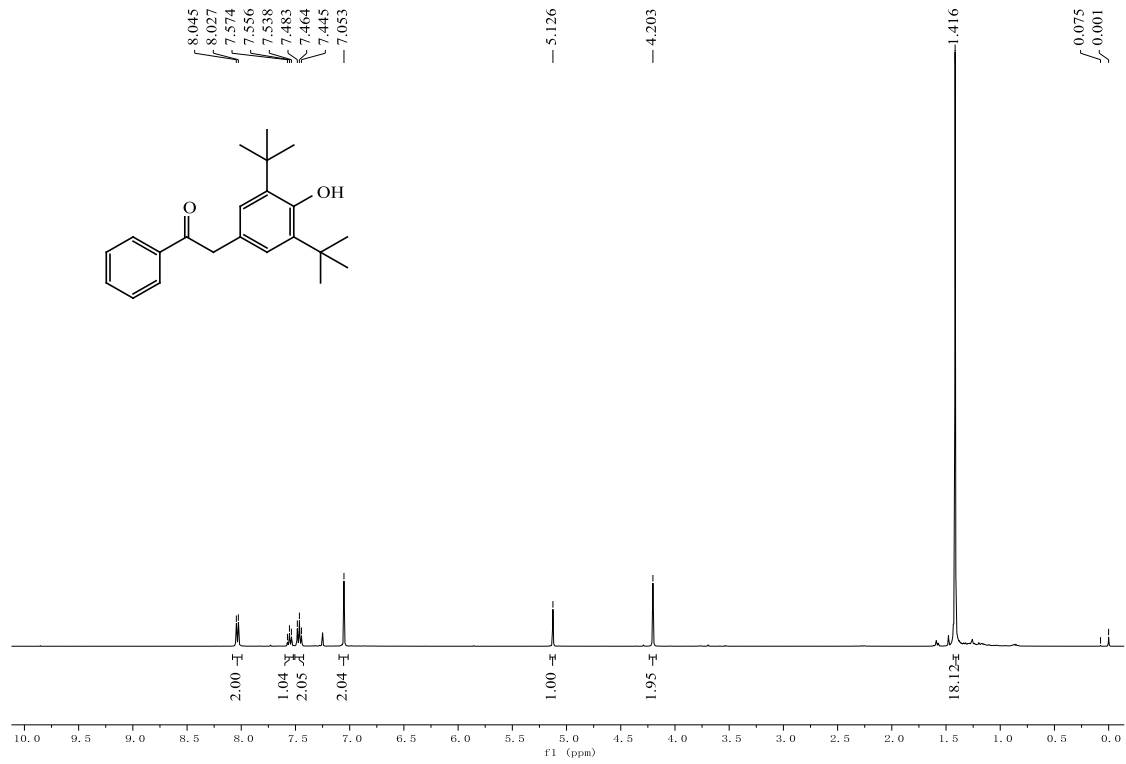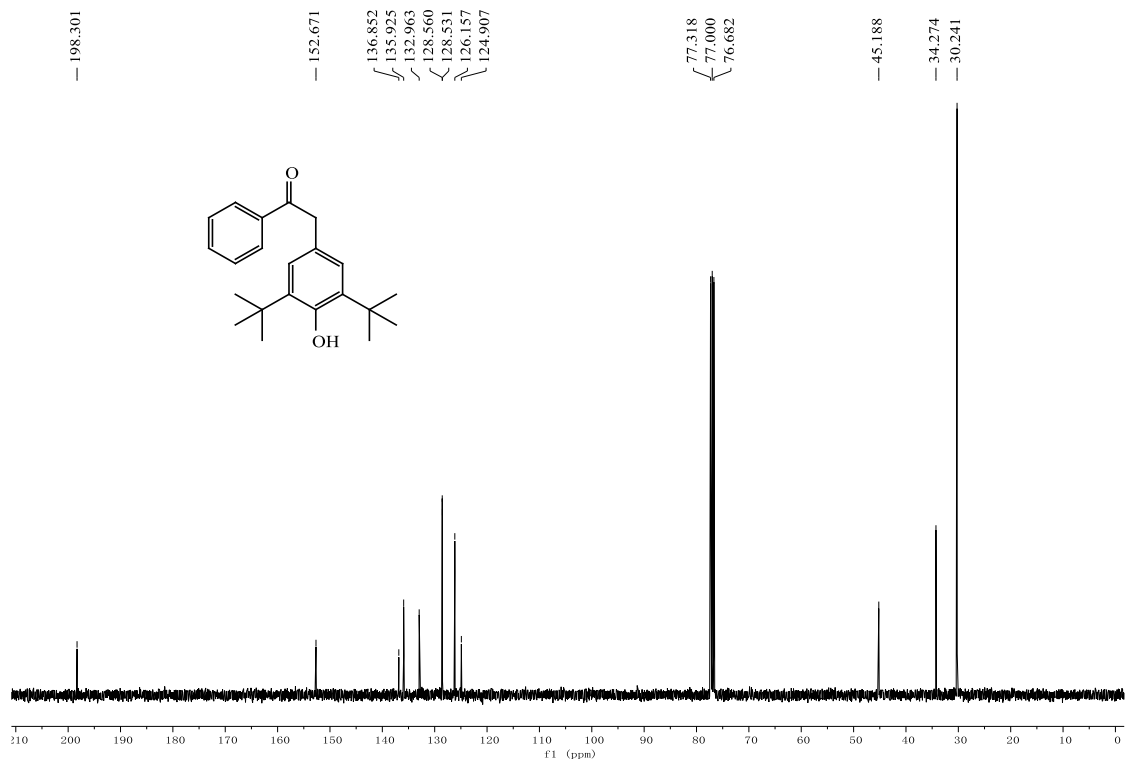



# 1-Cyclohexyl-2-(4-methoxyphenyl)ethan-1-one (5aa)

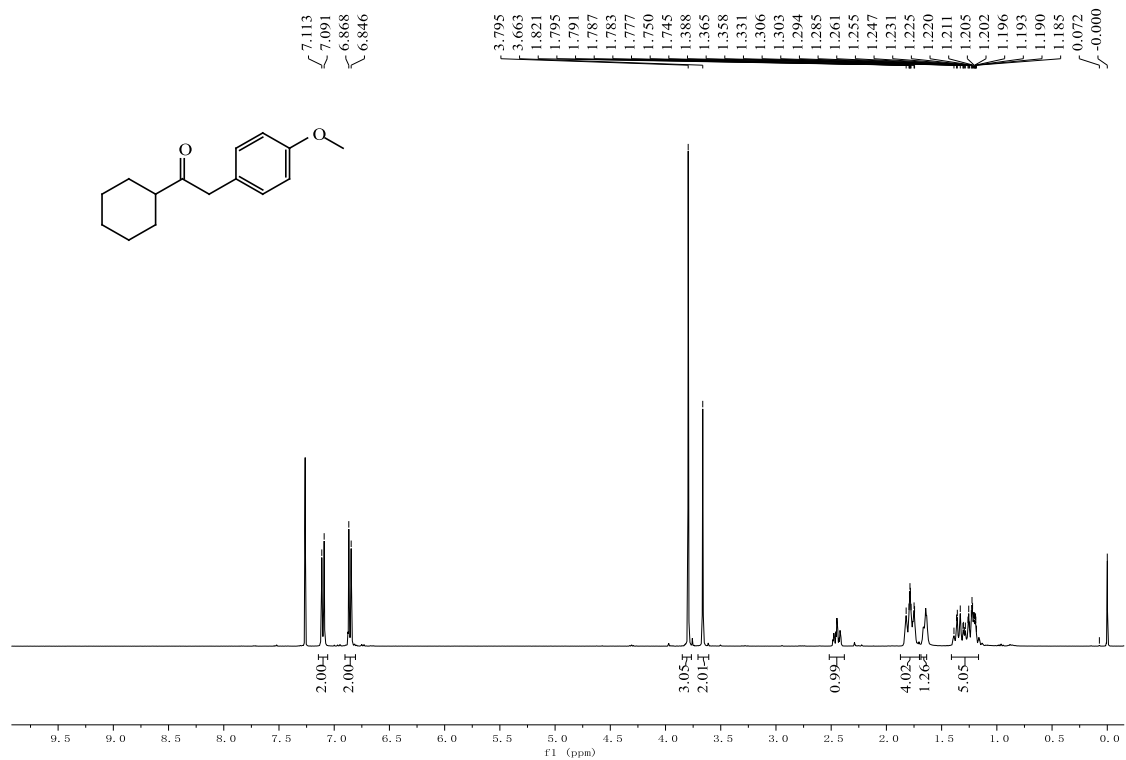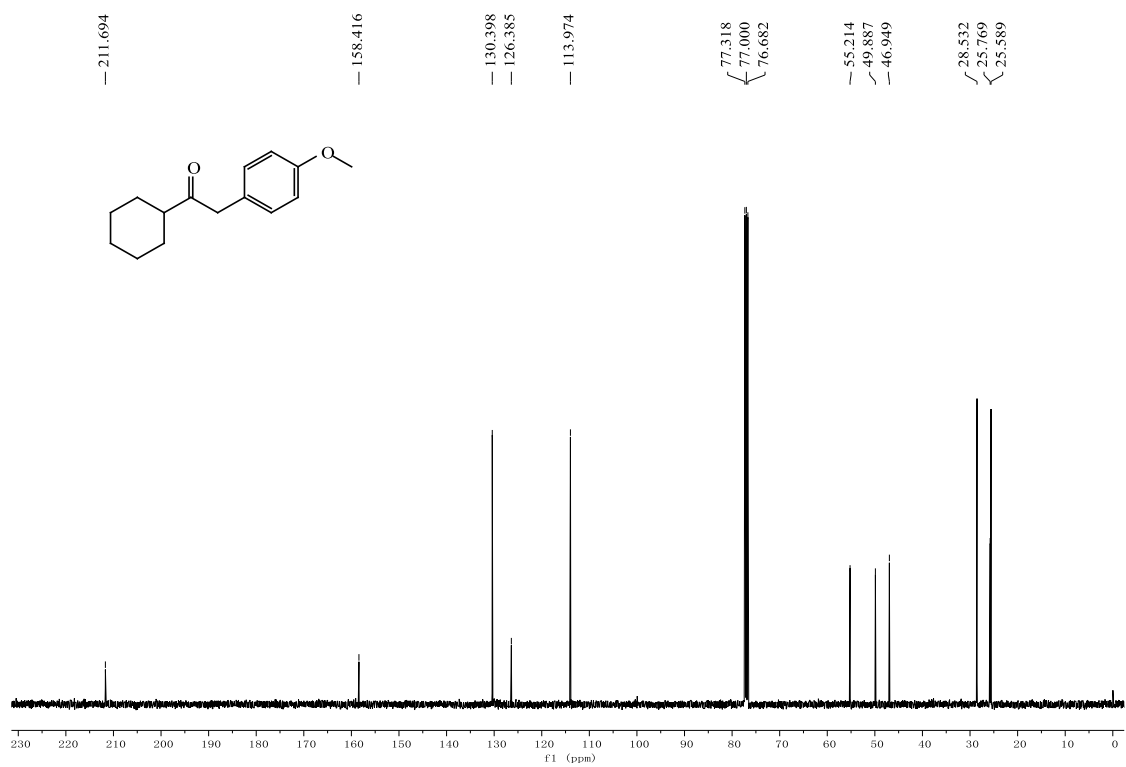

**1-Cyclopropyl-2-(4-methoxyphenyl)ethan-1-one (5ba)**

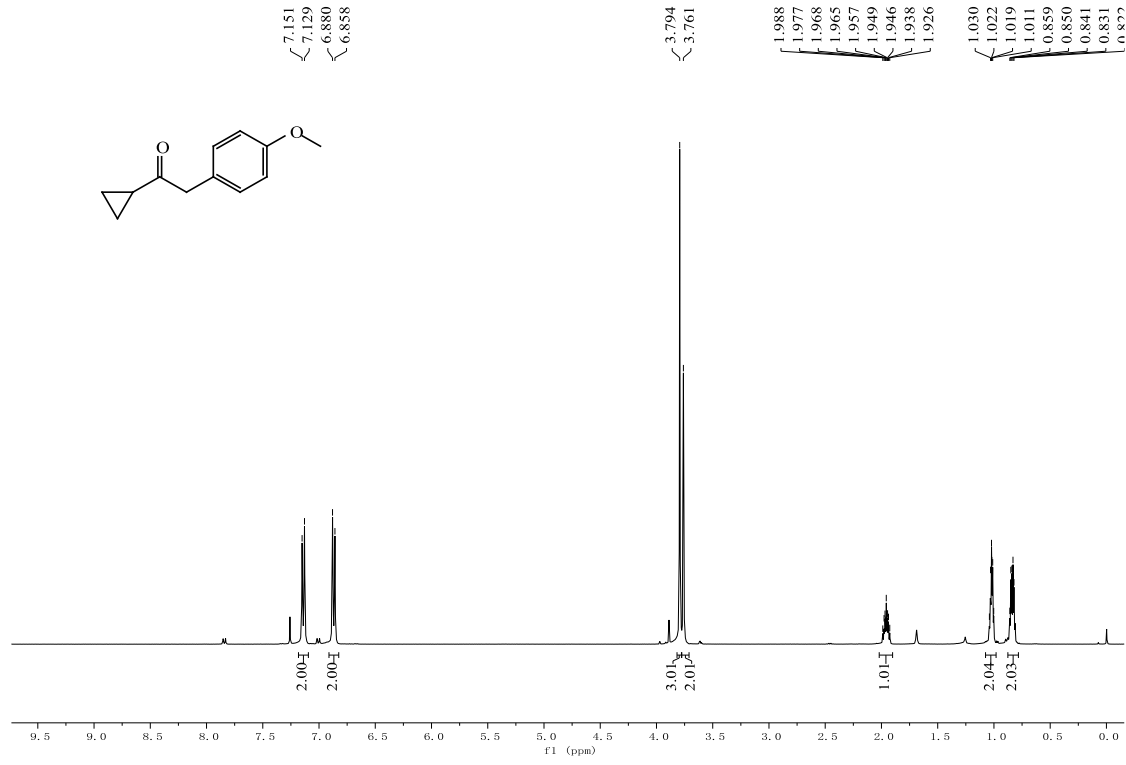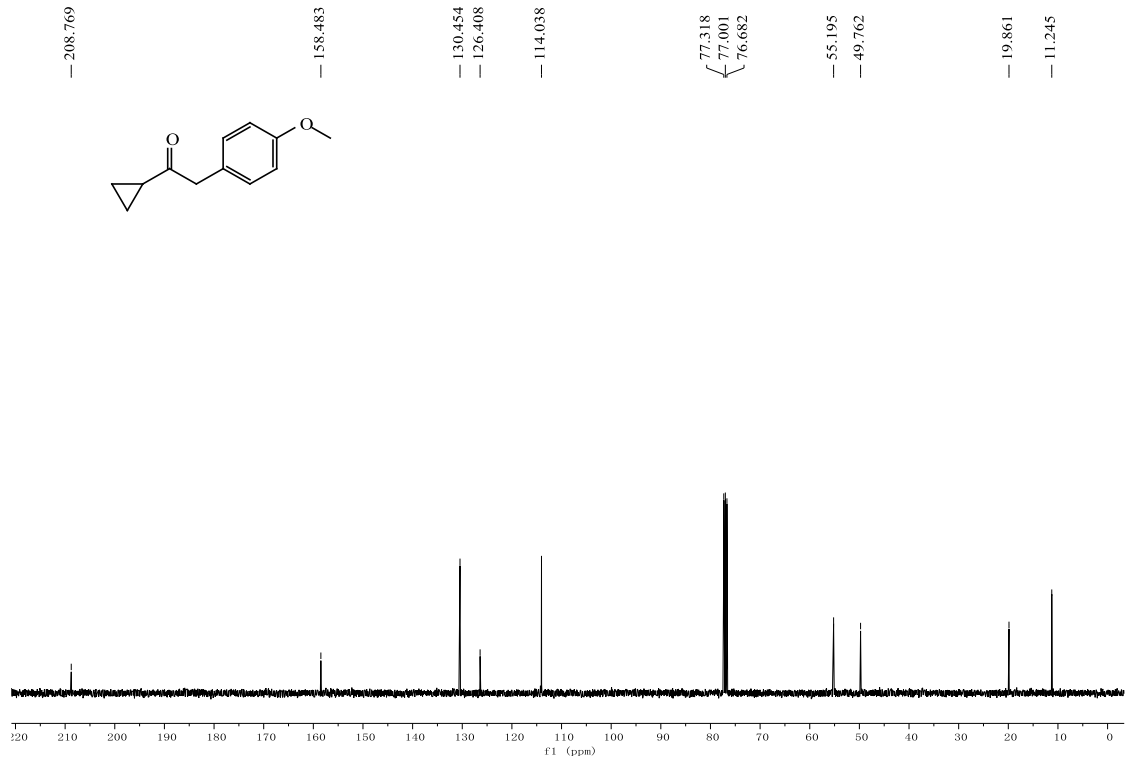

**4-Cyclopentyl-1-(4-methoxyphenyl)butan-2-one (5ca)**

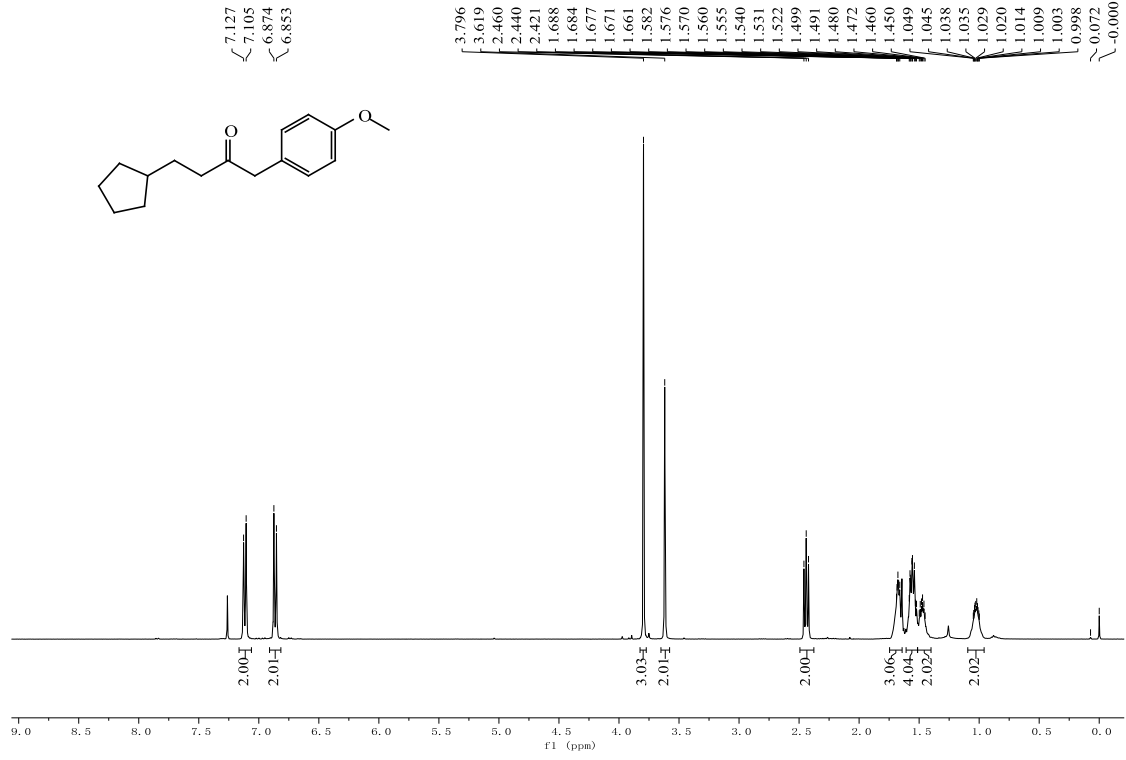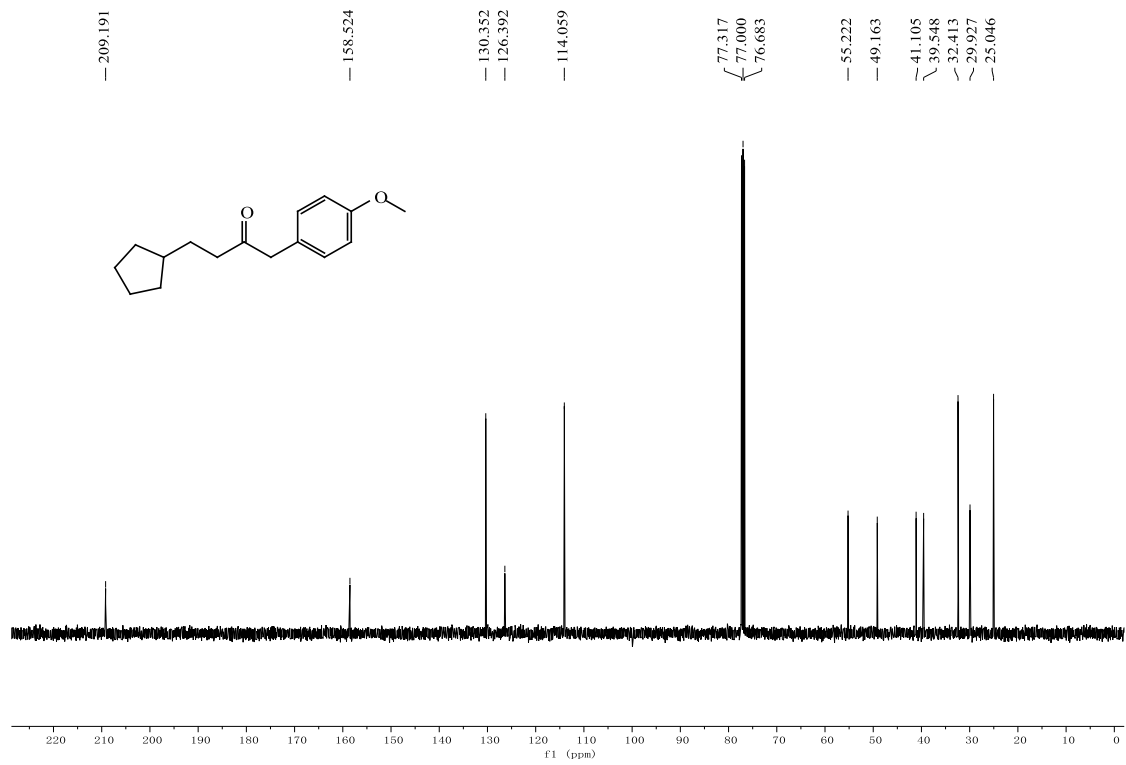

**1-(4-Methoxyphenyl)-4-phenylbutan-2-one (5da)**

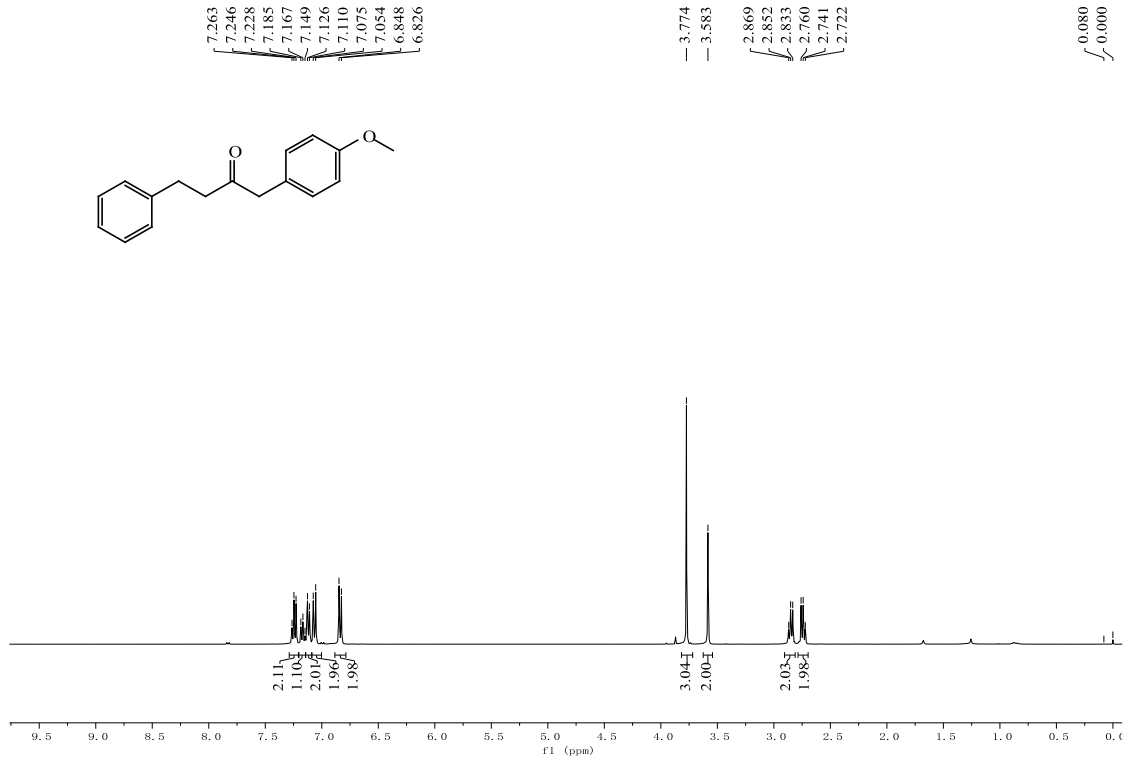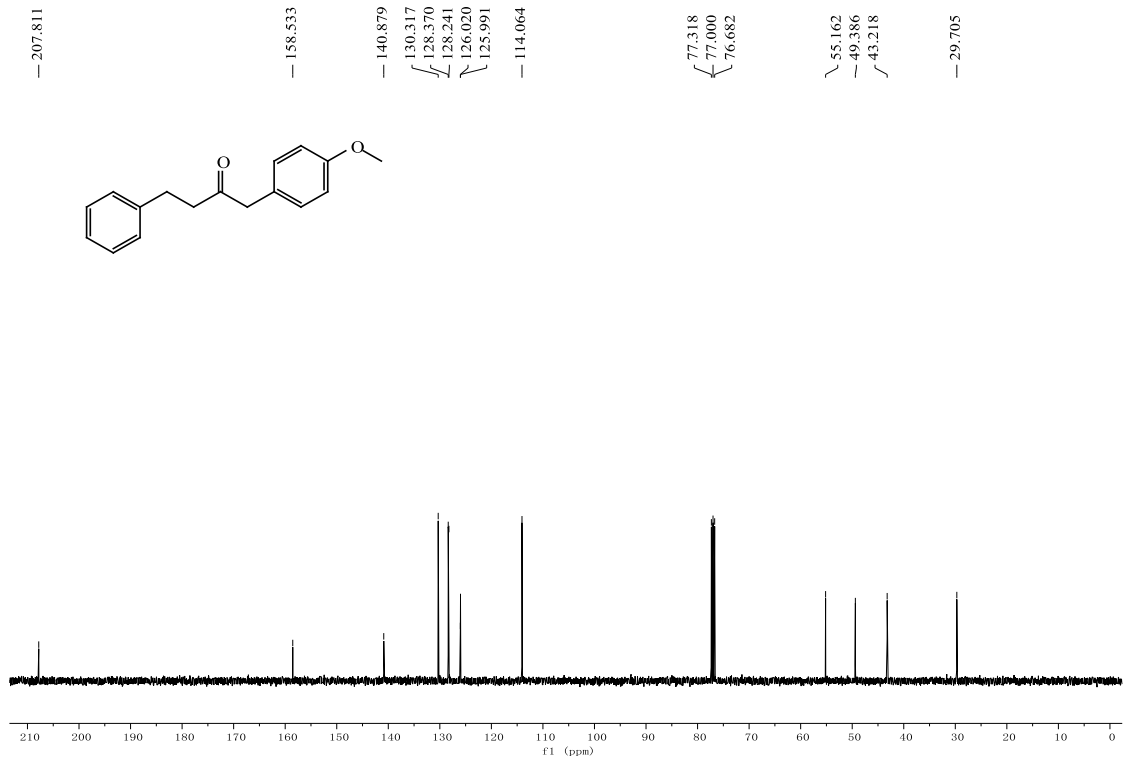

1-(4-Methoxyphenyl)hexan-2-one (5ea)

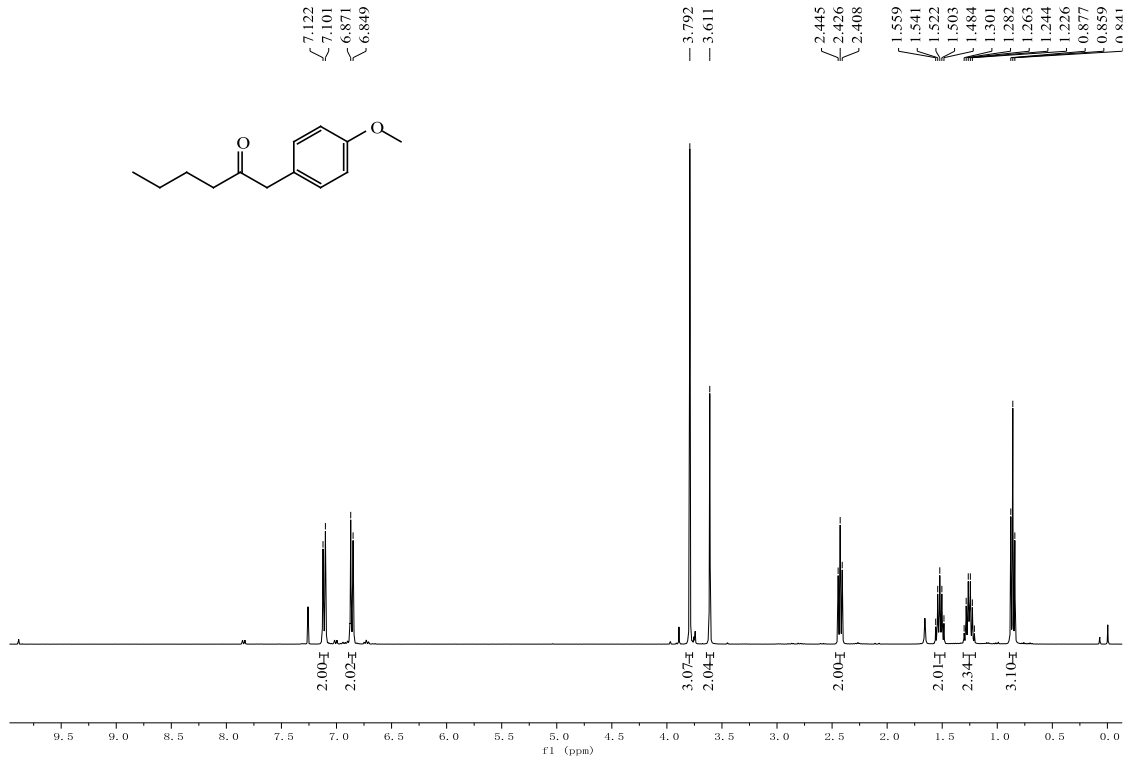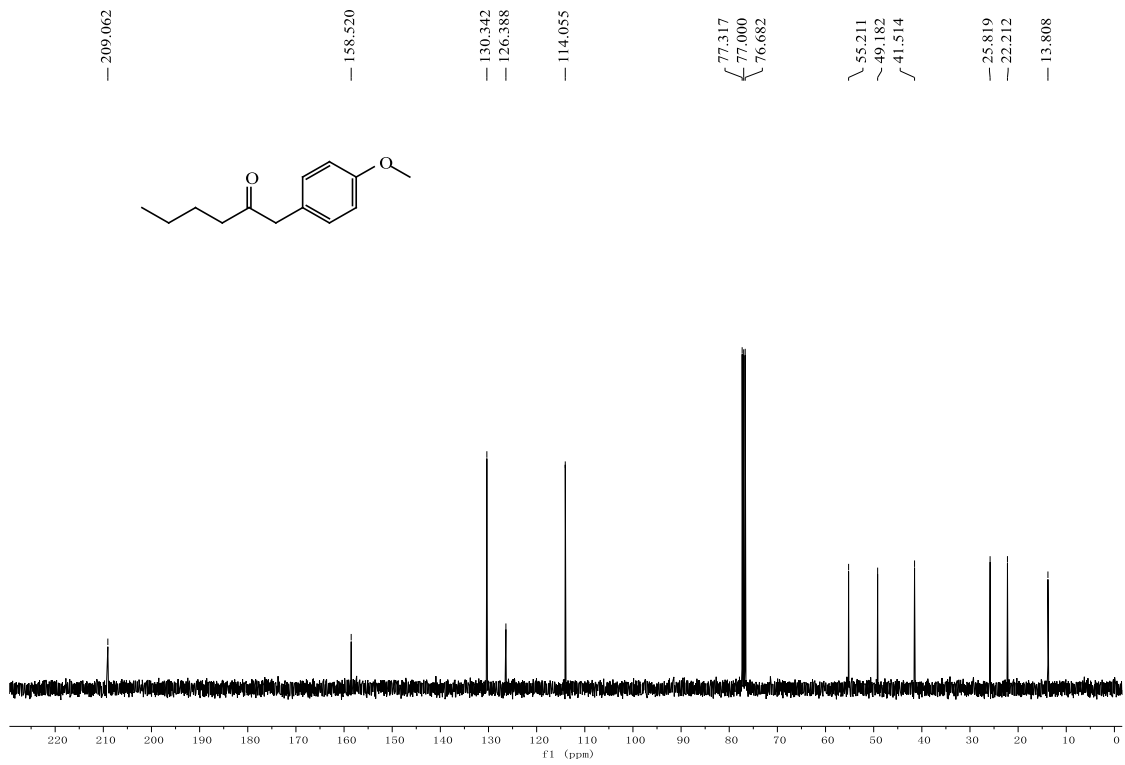

# 1-(4-Methoxyphenyl)heptan-2-one (5fa)

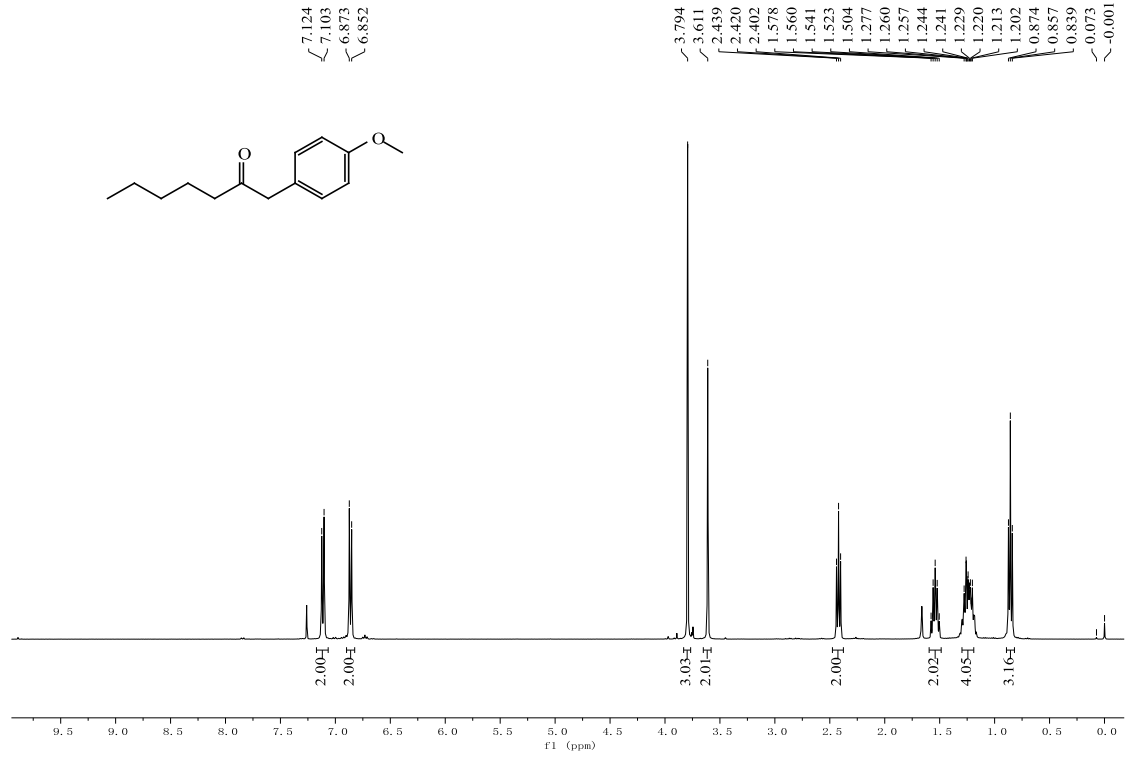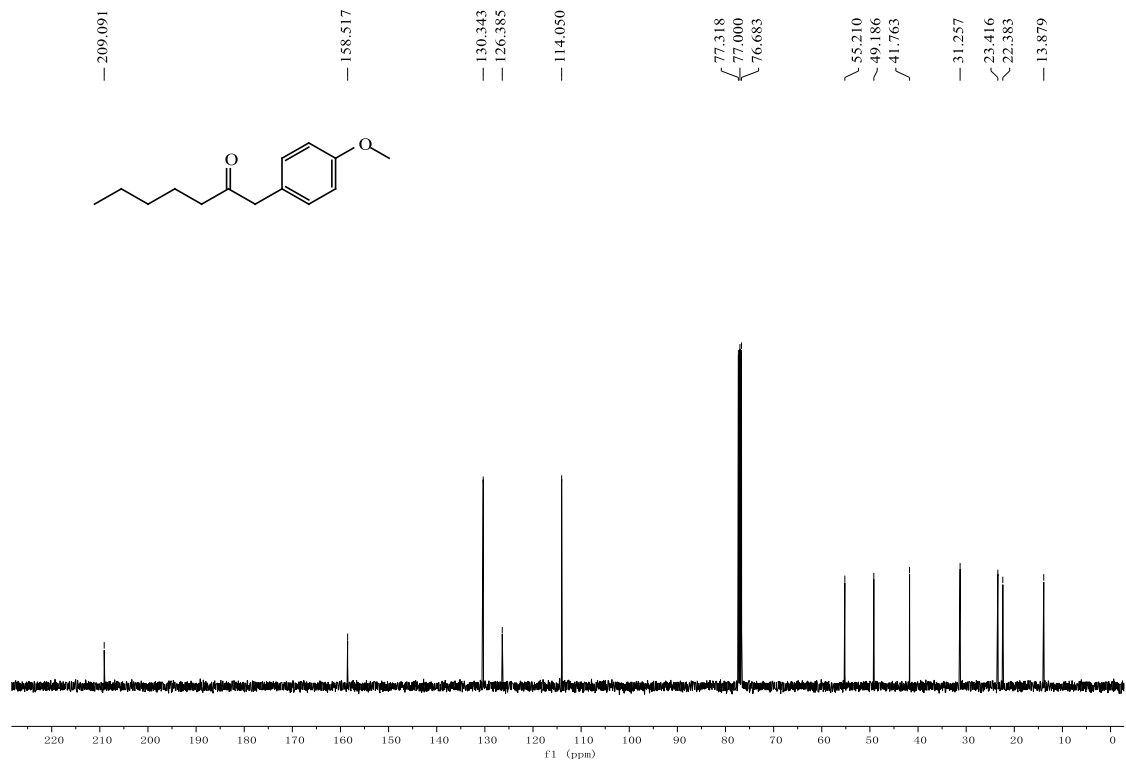

2-(4-(2-Oxo-2-phenylethyl)phenoxy)ethyl 2-(2-fluoro-[1,1'-biphenyl]-4-yl)propanoate (7aa)

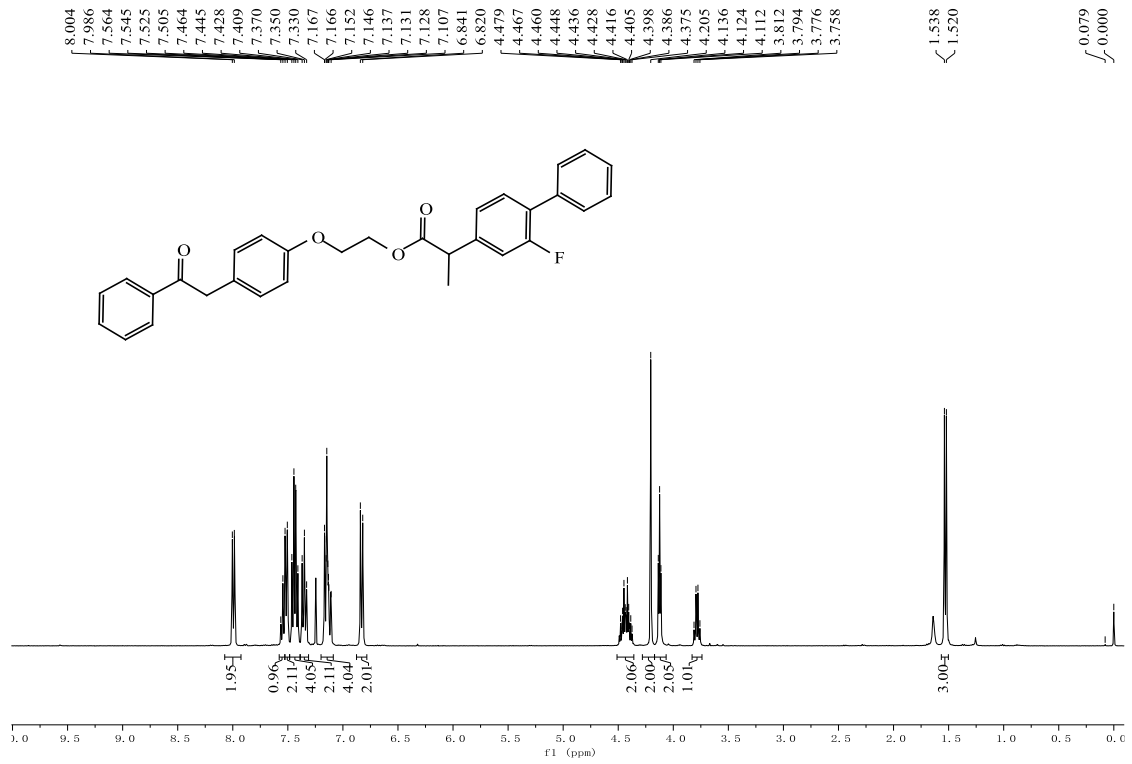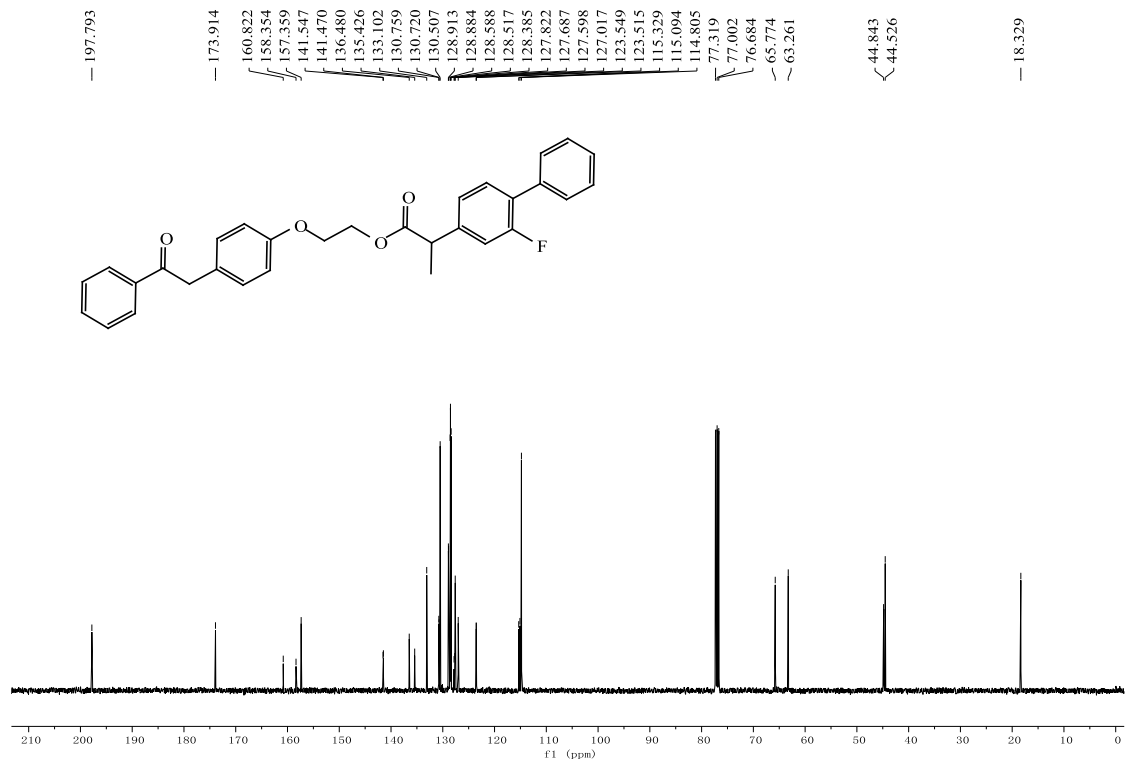

2-(4-(2-Oxo-2-phenylethyl)phenoxy)ethyl 2-(3-benzoylphenyl)propanoate (7ab)

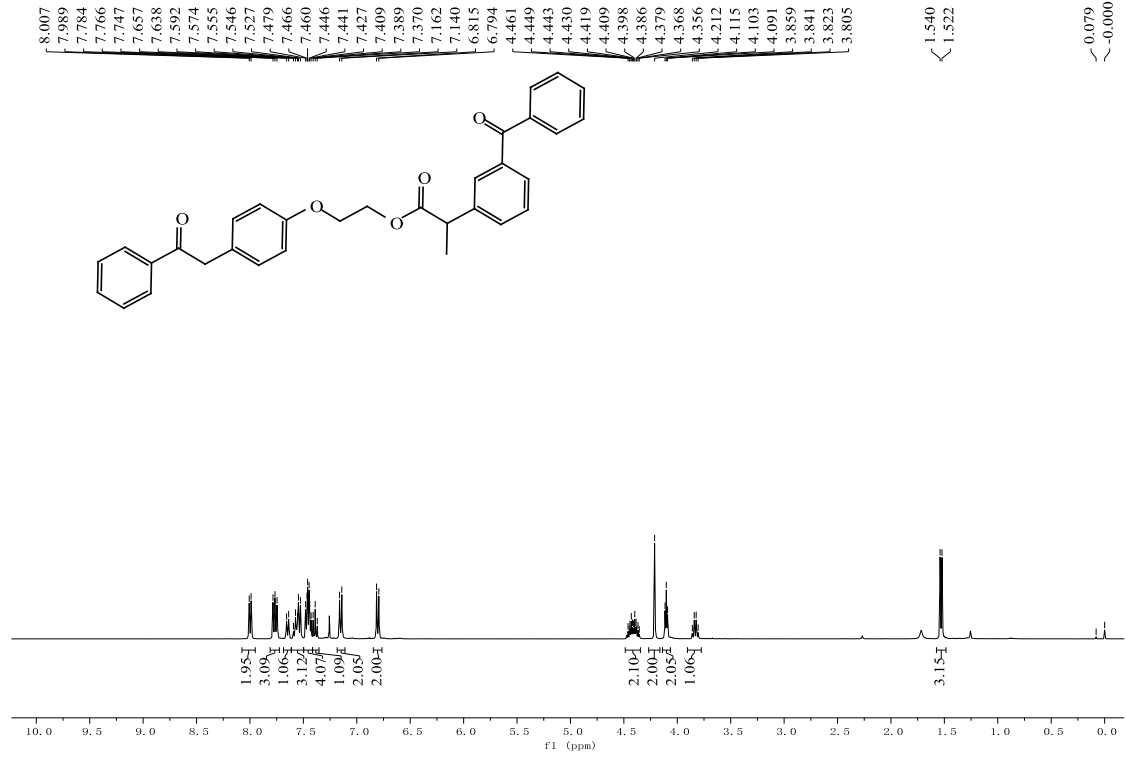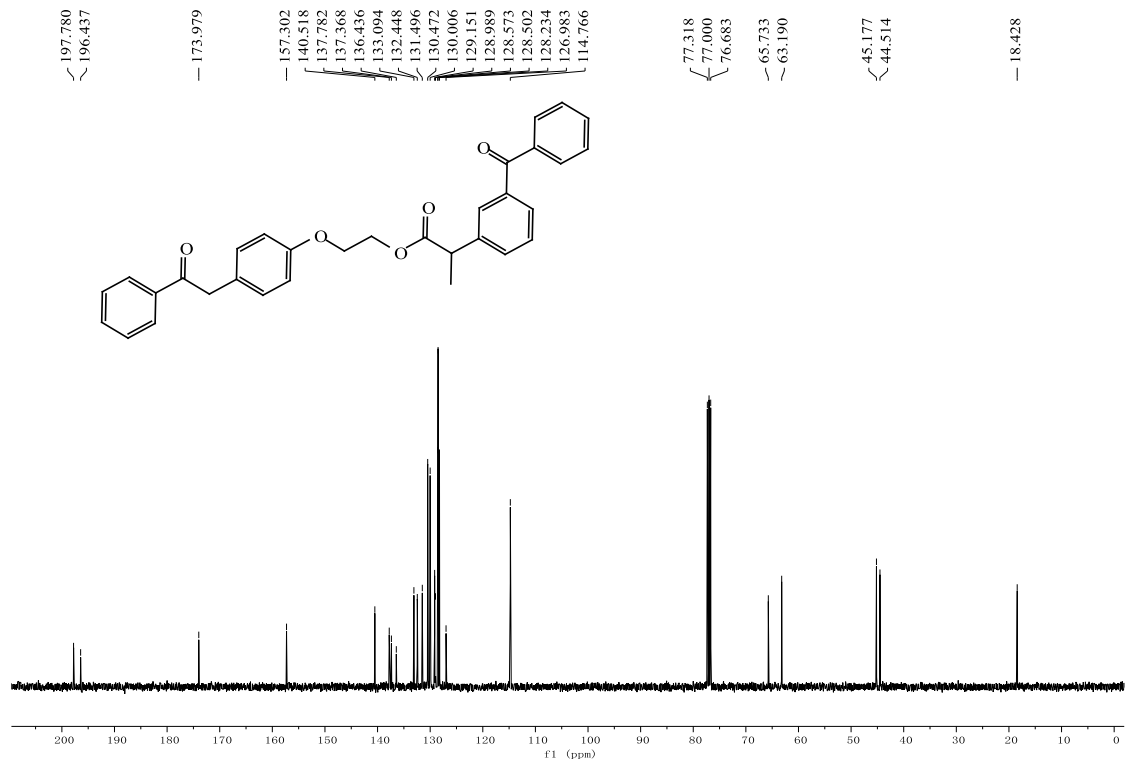



2-(4-(2-Oxo-2-phenylethyl)phenoxy)ethyl 2-(4-((2-oxocyclopentyl)methyl)phenyl)propanoate

(7ac)

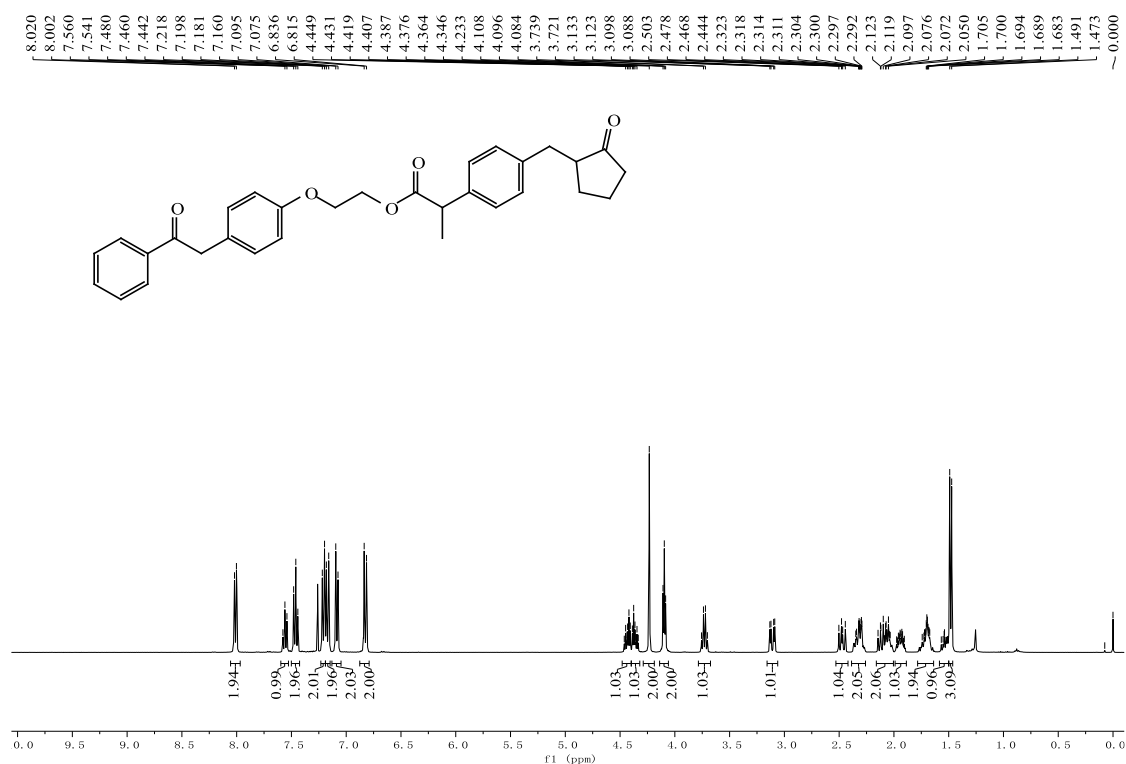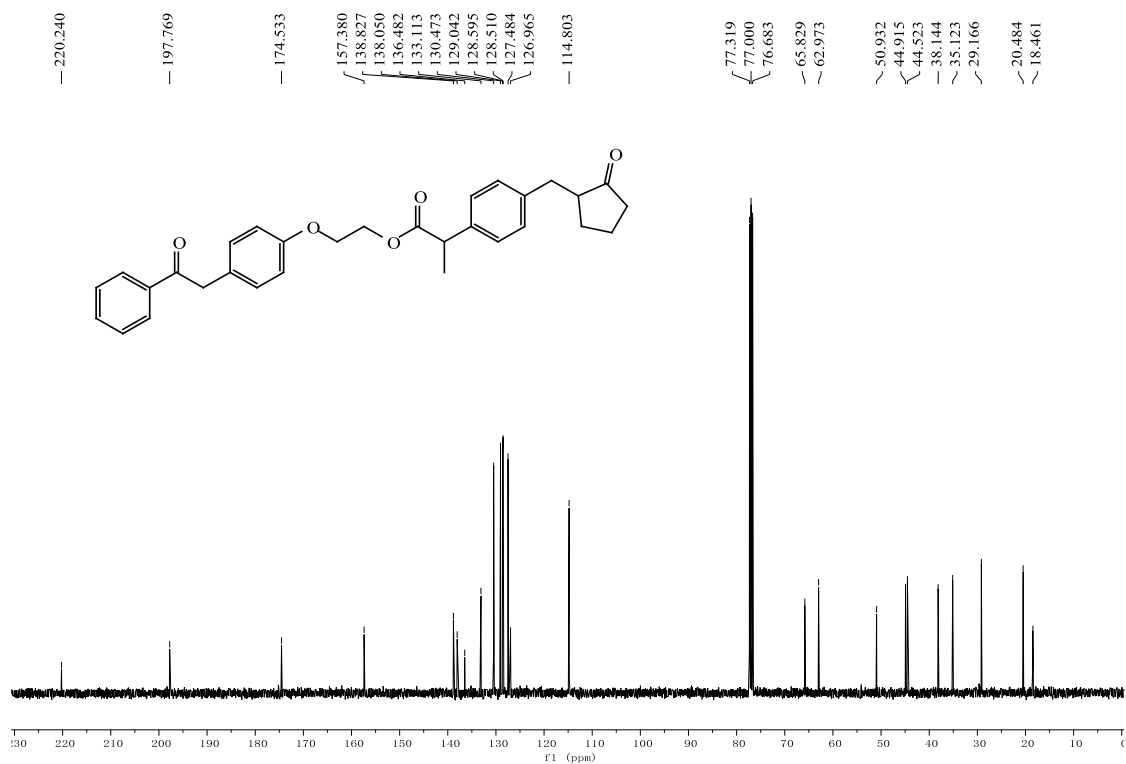

2-(4-(2-Oxo-2-phenylethyl)phenoxy)ethyl 2-(11-oxo-6,11-dihydrodibenzo[b,e]oxepin-8-yl)acetate

(7ad)

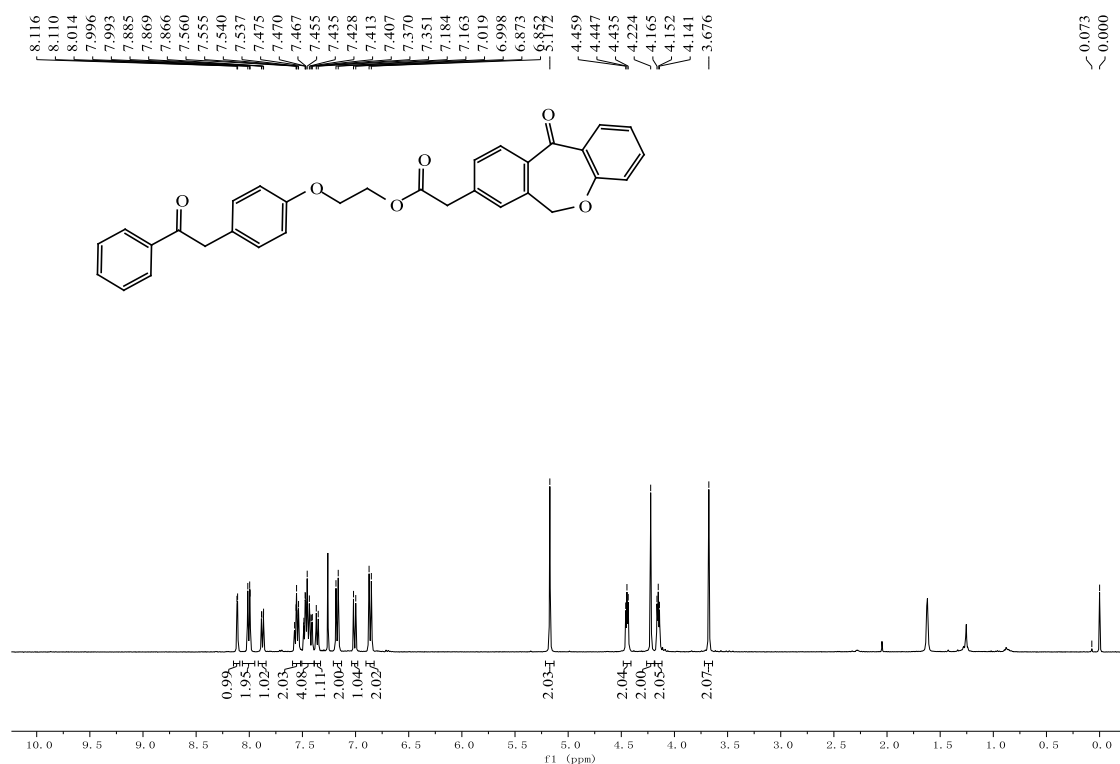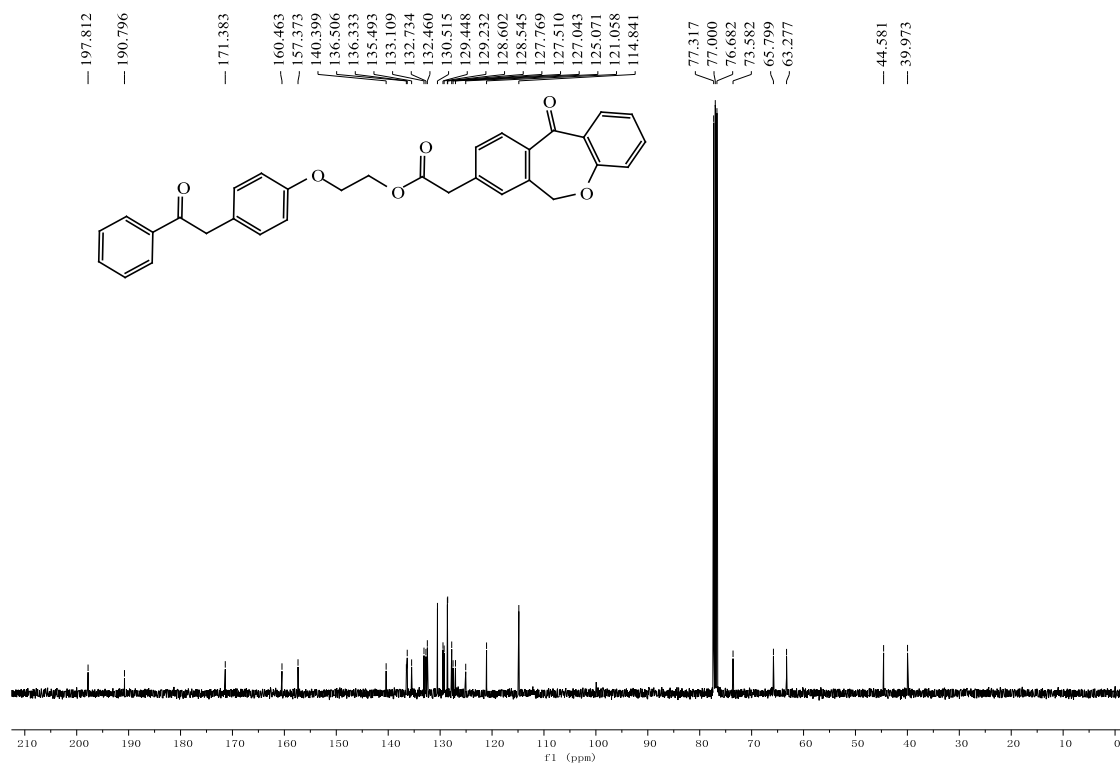

2-(4-(2-Oxo-2-phenylethyl)phenoxy)ethyl (S)-2-(6-methoxynaphthalen-2-yl)propanoate (7ae)

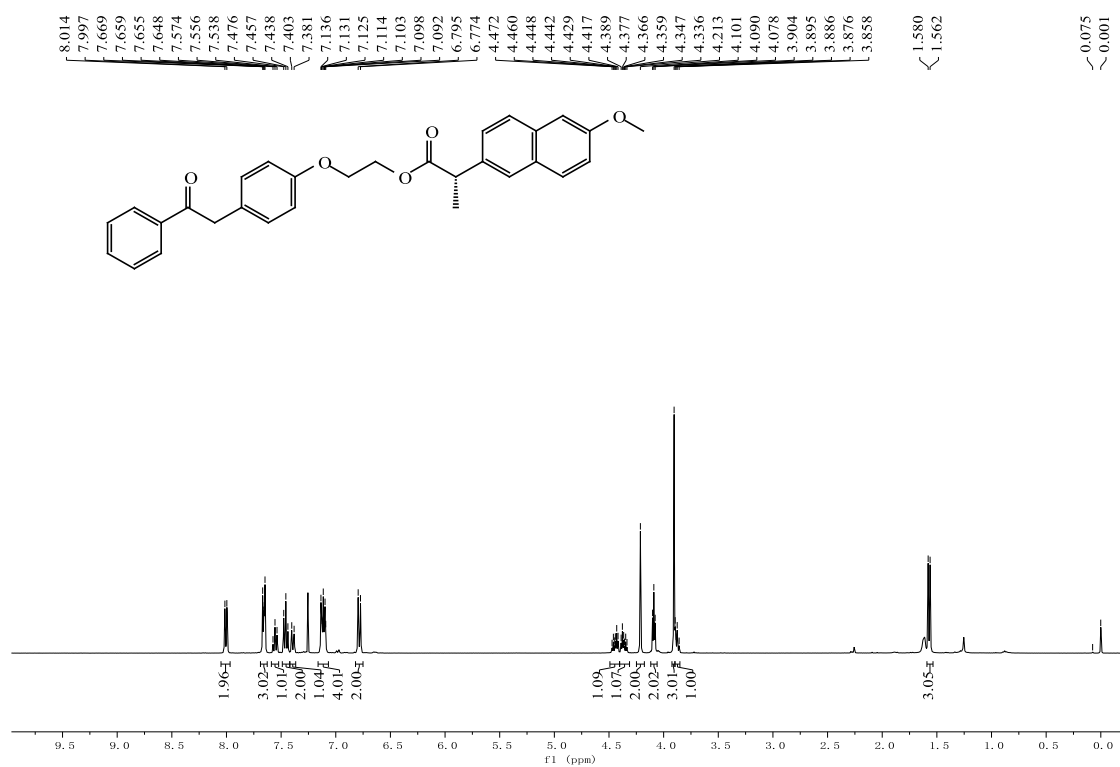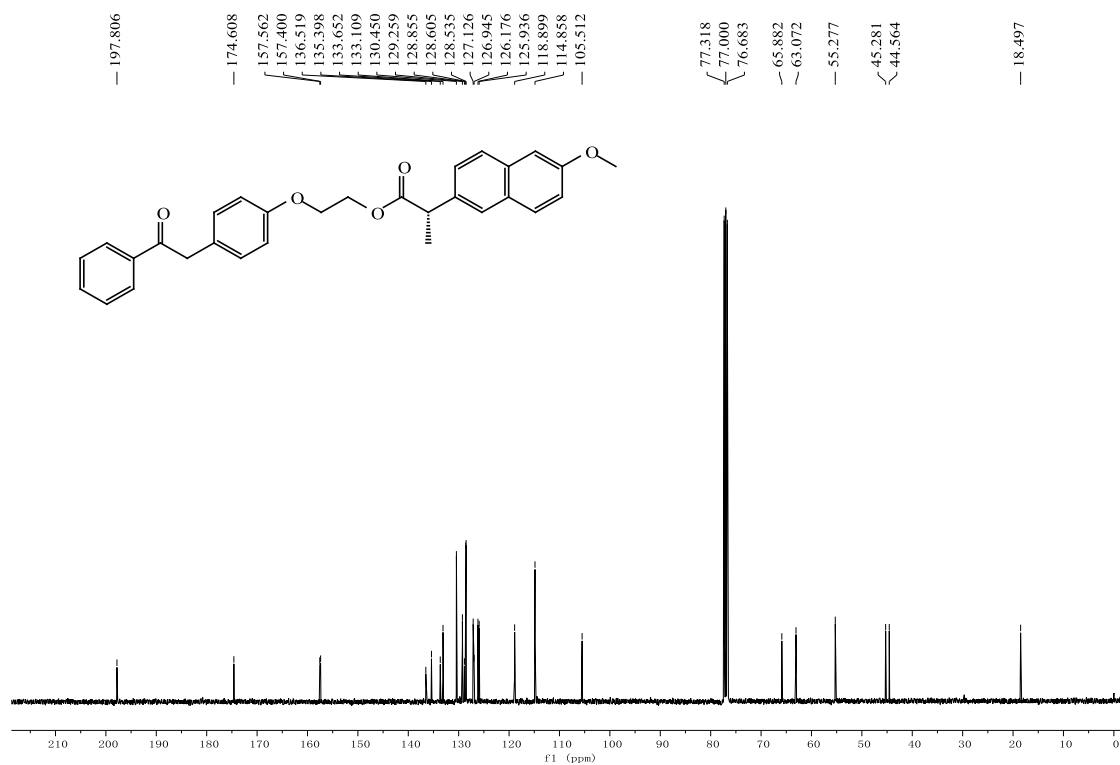

**2-(4-(2-Oxo-2-phenylethyl)phenoxy)ethyl 2-(1-(4-chlorobenzoyl)-5-methoxy-2-methyl-1H-indol-3-yl)acetate (7af)**

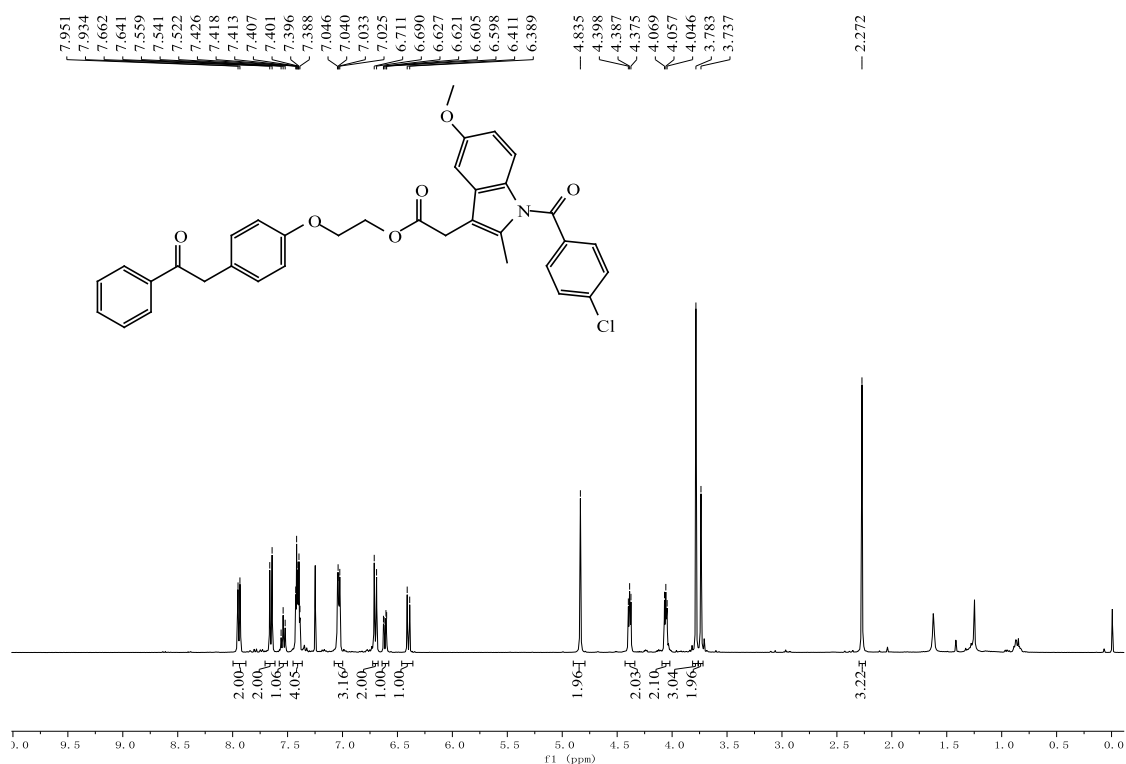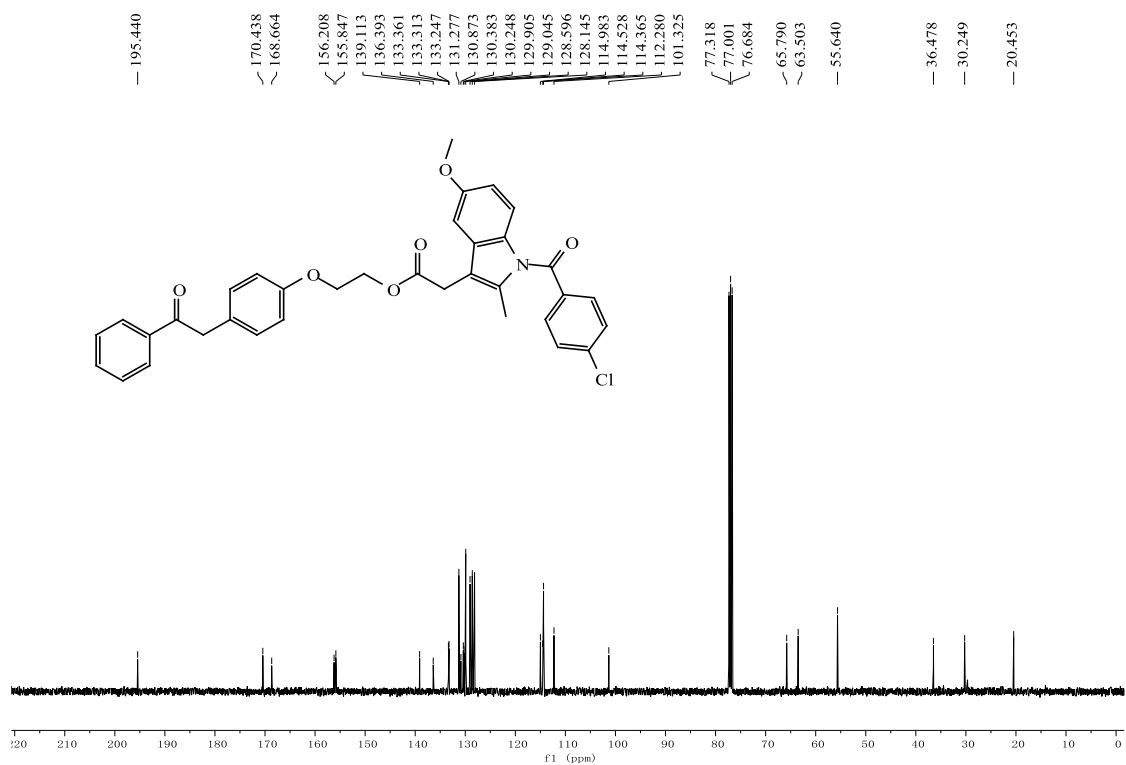

Supplement: d2gc02972c1.pdf [file d2gc02972c1.pdf]
